# Supplementary material for: Xenobiotic Effects of Chlorine Dioxide to Escherichia coli O157:H7 on Non-host Tomato Environment Revealed by Transcriptional Network Modeling: Implications to Adaptation and Selection
Source: Front Microbiol. 2020 Jun 3;11:1122. doi: 10.3389/fmicb.2020.01122 (PMC7286201; doi:10.3389/fmicb.2020.01122)
Supplement: Supplementary file 3 [file Table_3.XLSX]

## Sheet: Table S3 Sheet 1
Additional file 3: Table S3 Sheet 1 Propensity and module of E. coli genes during treatment of 1 µg ClO2 after 1, 2 and 3 hour (hr). Co-expression network of each module was showing in Fig. 7. Different modules were separated by different colors for easy view.
gene_id	1 µg_1 hr_propensity	1 µg_2 hr_propensity	1 µg_3 hr_propensity	1 µg_ctrl_propensity	Module	annotation	highlighted function	function_category	selected_sub-category	KEGG pathway
ECs3595	0.0305271	0.161671	0.232467	-0.638553	1	sigma factor RpoS	biofilm	Pathogenicity	sigma-related	Biofilm formation - Escherichia coli
ECs3553	-0.213474	0.355302	0.263549	-0.815616	1	carbon storage regulator	biofilm	Pathogenicity	Biofilm formation	Biofilm formation - Escherichia coli
ECs3289	-0.0335509	0.193395	0.199418	-0.52544	1	glucose-specific PTS system IIA component	biofilm	Pathogenicity	Biofilm formation	Biofilm formation - Escherichia coli
ECs1420	-0.432328	0.500624	-0.0621225	-0.304006	1	curlin major subunit CsgA	biofilm	Pathogenicity	Biofilm formation	Biofilm formation - Escherichia coli
ECs0613	0.629312	-0.607727	-1.09146	0.285342	1	putative inner membrane component for iron transport	two-component	Pathogenicity	Two-component system	Two-component system
ECs4271	0.64506	-0.449256	-1.20924	0.221626	1	putative ATP binding protein of ABC transporter	two-component	Pathogenicity	Two-component system	Two-component system
ECs5132	-0.0240125	0.187599	0.433487	-1.35073	1	fumarate reductase FrdD	two-component	Stress response	Two-component system	Two-component system
ECs3104	-0.239137	0.185741	0.346261	-0.566853	1	outer membrane protein C OmpC	two-component	Pathogenicity	Two-component system	beta-Lactam resistance
ECs3722	0.666305	-0.539292	-1.18414	0.229026	1	type III secretion protein EpaR2	T3SS	Pathogenicity	T3SS
ECs3460	-0.171049	0.177903	0.204276	-0.331406	1	putative yhbH sigma 54 modulator	sigma	Pathogenicity	sigma-related
ECs4082	-0.0130192	0.166512	0.255325	-0.629635	1	probable sigma-54 modulation protein	sigma	Pathogenicity	sigma-related
ECs0350	0.671871	-0.506327	-1.30533	0.234134	1	putative adhesin	adhesin	Pathogenicity	adhesin
ECs3414	0.6828	-0.657916	-0.883816	0.167559	1	putative LACI-type transcriptional regulator	quorum sensing	Pathogenicity	Quorum sensing
ECs2045	0.203556	0.0720717	0.359002	-1.29281	1	putative ATP-binding component of a transport system	quorum sensing	Pathogenicity	Quorum sensing	Quorum sensing
ECs5276	0.696152	-0.735827	-1.2784	0.28892	1	export and assembly outer membrane protein of type 1 fimbriae	fimbrial	Cell motility	flagellar/fimbrial/curli/pili-related
ECs5278	0.696468	-0.542354	-1.14946	0.176692	1	fimbrial morphology	fimbrial	Cell motility	flagellar/fimbrial/curli/pili-related
ECs1245	-0.236462	0.283209	0.487728	-1.50505	1	MokW protein	host cell-killing modulation protein in Salmonella typhi	Other category
ECs2198	0.133956	0.0863078	0.385743	-1.22066	1	MokW	host cell-killing modulation protein in Salmonella typhi	Other category
ECs0848	0.610803	-0.407462	-1.1514	0.232494	1	hypothetical protein	pathogenicity	Pathogenicity		Pathogenic Escherichia coli infection
ECs1683	0.0978115	0.351927	0.205063	-1.37828	1	putative sporulation protein	sporulation	Other category
ECs1083	0.64506	-0.472513	-1.39156	0.27292	1	putative crossover junction endodeoxyribonuclease	SOS response	Nucleotide metabolism and DNA recombination
ECs2365	0.143946	0.220213	0.308226	-1.41993	1	superoxide dismutase	SOS response	Stress response
ECs0966	0.0152775	0.111209	0.329159	-0.758476	1	cold shock protein	cold shock protein	Stress response
ECs2086	-0.136366	0.187436	0.350598	-0.732619	1	osmotically inducible protein	osmotically inducible	Stress response
ECs0434	0.132956	0.218822	0.152992	-0.78509	1	phosphate starvation-induced protein psiF	phosphate starvation-induced	Stress response
ECs1266	-0.20742	0.546272	0.229605	-1.69419	1	ATP-binding pho regulon component PhoH	phosphate starvation-induced	Transcription and RNA processing
ECs2584	-0.0866351	0.262153	0.327121	-0.966296	1	copper homeostasis protein	stress response	Stress response
ECs0916	0.00170155	0.220906	0.331654	-1.05426	1	putative receptor	receptor	Transport
ECs1756	0.209325	0.328474	0.153182	-1.47399	1	putative outer membrane protein	outer membrane protein	Pathogenicity	outer membrane protein
ECs2445	-0.197691	0.236062	0.332451	-0.703668	1	activator of ntrL gene	outer membrane protein	Pathogenicity
ECs0594	0.632223	-0.643613	-1.16086	0.312925	1	putative outer membrane protein	outer membrane protein	Pathogenicity	outer membrane protein
ECs3345	0.629312	-0.520715	-1.09146	0.247602	1	hydrogenase 4 membrane subunit	membrane	Other category
ECs5093	-0.0292082	0.359971	0.205787	-1.0201	1	low-affinity transport system proline permease II	membrane	Transport
ECs3524	-0.00281379	0.161662	0.37199	-1.00764	1	transport permease protein of gamma-aminobutyrate	membrane	Transport
ECs4137	0.587902	-0.453095	-1.10388	0.27292	1	transmembrane protein affects septum formation and cell membrane permeability	membrane	Transport
ECs3053	0.633309	-0.588374	-1.13094	0.282222	1	putative transport system permease protein	membrane	Transport
ECs4799	0.636963	-0.517137	-1.1085	0.24013	1	putative permease	membrane	Transport
ECs2849	0.677685	-0.569505	-1.2944	0.2523	1	putative colanic acid biosynthesis glycosyl transferase	polysaccharide	Other category
ECs0507	-0.242989	0.225115	0.315743	-0.569836	1	glycoprotein/polysaccharide metabolism	polysaccharide	Carbohydrate metabolism
ECs1769	0.610651	-0.501297	-1.22619	0.296177	1	putative phage replication protein	prophage	Nucleotide metabolism and DNA recombination
ECs0280	0.692885	-0.625075	-1.01349	0.180982	1	putative tail fiber protein	prophage	Other category
ECs0812	0.690084	-0.587205	-1.08895	0.190682	1	NinG protein	prophage	Other category
ECs0835	0.68964	-0.501297	-1.39324	0.224718	1	putative minor tail protein	prophage	Other category
ECs0840	0.614423	-0.604597	-1.10634	0.306821	1	putative tail assembly protein	prophage	Other category
ECs1116	0.697704	-0.694068	-1.16764	0.245521	1	putative minor tail protein	prophage	Other category
ECs1782	0.675832	-0.656517	-1.21435	0.27292	1	putative holin protein	prophage	Other category
ECs2188	0.617533	-0.565415	-1.15677	0.29921	1	putative holin protein	prophage	Other category
ECs3497	0.691384	-0.669135	-1.32949	0.281503	1	holin protein	prophage	Other category
ECs2419	-0.295825	0.437916	0.276367	-1.01739	1	integration host factor IHF alpha subunit	prophage	Pathogenicity
ECs0825	0.687942	-0.559249	-1.03283	0.164117	1	putative terminase large subunit	prophage	Nucleotide metabolism and DNA recombination
ECs0757	0.642215	-0.798347	-0.935451	0.295393	1	putative fumarate hydratase	biosynthesis of antibiotics	Stress response		Biosynthesis of antibiotics
ECs4802	0.665679	-0.740777	-0.852563	0.215761	1	putative aldose-1-epimerase	biosynthesis of antibiotics	Stress response		Biosynthesis of antibiotics
ECs0034	0.080625	0.163064	0.231964	-0.737309	1	dihydrodipicolinate reductase	biosynthesis of antibiotics	Stress response		Biosynthesis of antibiotics
ECs3639	0.0198396	0.21216	0.26874	-0.844725	1	enolase	biosynthesis of antibiotics	Stress response		Biosynthesis of antibiotics
ECs3796	0.105771	0.150123	0.179496	-0.626779	1	fructose-bisphosphate aldolase class II	biosynthesis of antibiotics	Stress response		Biosynthesis of antibiotics
ECs4773	0.076897	0.186658	0.178386	-0.650624	1	acetyl-CoA transferase	biosynthesis of antibiotics	Stress response		Biosynthesis of antibiotics
ECs5192	0.00567264	0.363987	0.173196	-1.0117	1	ammonium transport system structural protein	biosynthesis of antibiotics	Stress response		Biosynthesis of antibiotics
ECs5007	0.101989	0.0509088	0.383597	-0.996785	1	lysine sensitive aspartokinase III	biosynthesis of antibiotics	Stress response		Biosynthesis of antibiotics
ECs1260	0.105063	0.152229	0.251782	-0.819959	1	proline dehydrogenase	biosynthesis of antibiotics	Stress response		Biosynthesis of antibiotics
ECs2082	0.0616638	0.206511	0.261922	-0.902142	1	alcohol dehydrogenase	biosynthesis of antibiotics	Stress response		Biosynthesis of antibiotics
ECs4831	0.664403	-0.585254	-1.20478	0.257171	1	rhamnulokinase	fructose	Carbohydrate metabolism		Fructose and mannose metabolism
ECs4933	-0.0178694	0.208646	0.266768	-0.752193	1	isocitrate lyase	carbon metabolism	Other category		Carbon metabolism
ECs0583	0.665679	-0.740777	-1.14025	0.300319	1	putative carbamate kinase	carbon metabolism	Other category		Carbon metabolism
ECs0764	0.648433	-0.625075	-1.16764	0.286343	1	putative glutamate mutase S	carbon metabolism	Other category		Carbon metabolism
ECs1286	0.63501	-0.743859	-0.893385	0.27292	1	putative (3R)-hydroxymyristol-(acyl carrier protein) dehydratase	fatty acid metabolism	Other category
ECs2014	-0.0285943	0.221671	0.167536	-0.52493	1	acyl carrier protein phosphodiesterase	fatty acid metabolism	Transport
ECs2384	-0.369465	0.352926	0.450874	-1.2819	1	murein lipoprotein	lipoprotein	Other category
ECs1155	0.0463261	0.254688	0.19875	-0.81665	1	curved DNA-binding protein	curved DNA-binding protein	Nucleotide metabolism and DNA recombination
ECs3985	-0.0275288	0.30317	0.169363	-0.727832	1	putative cytochrome	cytochrome	Other category
ECs3522	0.0918245	0.201829	0.355189	-1.3823	1	succinate-semialdehyde dehydrogenase	dehydrogenase	Amino acid and protein metabolism		Alanine, aspartate and glutamate metabolism
ECs2048	0.156851	0.269558	0.266131	-1.5013	1	putative aldehyde dehydrogenase	dehydrogenase	Amino acid and protein metabolism		Arginine and proline metabolism
ECs4934	-0.0237737	0.187478	0.189195	-0.506768	1	isocitrate dehydrogenase kinase/phosphatase	dehydrogenase	Other category
ECs4464	0.10721	0.113653	0.421273	-1.43527	1	aldehyde dehydrogenase B	dehydrogenase; pyruvate	Amino acid and protein metabolism		Pyruvate metabolism
ECs2002	0.00947706	0.276168	0.125421	-0.620898	1	fermentative D-lactate dehydrogenase	dehydrogenase; pyruvate	Other category		Pyruvate metabolism
ECs4881	0.63768	-0.591811	-0.859943	0.196547	1	probable pyruvate formate lyase activating enzyme 2	oxidoreductase; pyruvate	Other category
ECs3160	-0.220226	0.194283	0.273765	-0.438856	1	NADH dehydrogenase I chain N	dehydrogenase; oxidative phosphorylation	Other category		Oxidative phosphorylation
ECs3163	-0.142469	0.305503	0.214964	-0.65371	1	NADH dehydrogenase I chain K	dehydrogenase; oxidative phosphorylation	Other category		Oxidative phosphorylation
ECs1442	0.0295155	0.355881	0.210595	-1.18314	1	glutaredoxin 2	glutaredoxin	Other category
ECs3931	-0.374098	0.306172	0.304963	-0.572608	1	glycogen biosynthesis protein GlgS	glycogen	Other category
ECs4806	0.662038	-0.61147	-1.074	0.238073	1	putative kinase	kinase	Other category
ECs1878	0.049187	0.211664	0.185562	-0.674067	1	probable oxidoreductase	oxidoreductase	Amino acid and protein metabolism		Arginine and proline metabolism
ECs5241	-0.0846594	0.283302	0.31369	-0.993752	1	putative oxidoreductase	oxidoreductase	Other category
ECs0369	0.657483	-0.415355	-1.36339	0.221626	1	putative oxidoreductase subunit	oxidoreductase	Other category
ECs1275	0.549089	-0.311505	-1.19055	0.269139	1	putative oxidoreductase	oxidoreductase	Other category
ECs1008					1	putative amidase	amidase	Stress response
ECs0479	0.0170918	0.261556	0.116484	-0.580252	1	involved in thiamin biosynthesis, alternative pyrimidine biosynthesis	thiamin	Other category		Pantothenate and CoA biosynthesis
ECs3955					1	probable ornithine aminotransferase	ornithine	Amino acid and protein metabolism		Arginine and proline metabolism
ECs2420	-0.121656	0.306433	0.153538	-0.548232	1	phenylalanine tRNA synthetase beta-subunit	phenylalanine	Nucleotide metabolism and DNA recombination		Aminoacyl-tRNA biosynthesis
ECs4892	0.68964	-0.540518	-1.15208	0.186977	1	putative amino acid amidohydrolase	phenylalanine	Amino acid and protein metabolism		Phenylalanine metabolism
ECs0388	0.183552	-0.0821693	0.557843	-2.07069	1	putative propionyl-CoA synthetase	propanoate	Other category		Propanoate metabolism
ECs3523	0.0616118	0.168128	0.4002	-1.37092	1	4-aminobutyrate aminotransferase activity	propanoate	Other category		Propanoate metabolism
ECs2401	0.653028	-0.618696	-0.998746	0.232098	1	putative enzyme	propanoate	Other category		Propanoate metabolism
ECs3057	0.681165	-0.540518	-1.20087	0.212295	1	hypothetical protein	pyrimidine	Nucleotide metabolism and DNA recombination		Pyrimidine metabolism
ECs0191	-0.132993	0.192887	0.256827	-0.507605	1	inhibitor of Rho	inhibitor of Rho	Other category
ECs4477					1	repressor for mtl	repressor	Transcription and RNA processing
ECs0567	-0.387636	0.327102	0.273421	-0.532328	1	repressor of allantoin regulon	repressor	Transcription and RNA processing
ECs5020	0.134404	0.227608	0.402431	-2.2586	1	periplasmic protein of mal regulon	regulon	Transcription and RNA processing
ECs1037	0.0254524	0.133211	0.334987	-0.853899	1	ribosome modulation factor	ribosome	Transcription and RNA processing
ECs0686					1	putative tRNA ligase	tRNA ligase	Transcription and RNA processing
ECs3753	0.0941144	0.17617	0.188229	-0.683491	1	hypothetical protein	selenocompound	Other category		Selenocompound metabolism
ECs0968	0.0932309	0.209634	0.15801	-0.688624	1	ATP-binding component of serine protease	serine protease	Amino acid and protein metabolism
ECs1022	0.656825	-0.618	-1.14618	0.266985	1	putative chaperone	chaperone	Other category
ECs0367	0.672692	-0.812236	-0.924022	0.255528	1	putative transcription factor	TF	Transcription and RNA processing
ECs2925	0.66276	-0.626664	-1.09373	0.248822	1	putative regulator	TF	Transcription and RNA processing
ECs0936	-0.104963	0.223458	0.176369	-0.439646	1	permease of putrescine transport protein	ABC transporter	Transport	ABC transporter	ABC transporters
ECs0360	-0.205278	0.48813	0.108276	-0.851272	1	high-affinity choline transport	transport	Transport
ECs5049	-0.00882828	0.221427	0.407338	-1.40682	1	putative transport protein	transport	Transport
ECs0758	0.642215	-0.535983	-1.34092	0.295393	1	putative transport protein	transport	Transport
ECs0940	0.626431	-0.449488	-1.26139	0.259406	1	putative transport protein	transport	Transport		Ascorbate and aldarate metabolism
ECs0539	-0.040165	0.306608	0.220797	-0.85492	1	putative amino acid/amine transport protein	transport	Transport
ECs1722	0.0395662	0.29925	0.176934	-0.874825	1	cation transport regulator	transport	Transport
ECs0606	0.664403	-0.990719	-1.02246	0.348143	1	hypothetical protein		Unknown
ECs0826	0.642479	-0.7134	-1.15061	0.323182	1	hypothetical protein		Unknown
ECs1026	0.61479	-0.606893	-1.14946	0.31777	1	hypothetical protein		Unknown
ECs1094	0.635688	-0.430393	-1.25059	0.234892	1	hypothetical protein		Unknown
ECs1192	0.653644	-0.604597	-0.924022	0.201461	1	hypothetical protein		Unknown
ECs1193	0.635463	-0.428733	-1.0853	0.19163	1	hypothetical protein		Unknown
ECs1240	0.663545	-0.482218	-1.16544	0.200723	1	hypothetical protein		Unknown
ECs1296	0.67429	-0.755223	-1.12344	0.289727	1	hypothetical protein		Unknown
ECs1298	0.649989	-0.82478	-1.09769	0.337952	1	hypothetical protein		Unknown
ECs1401	0.62153	-0.487675	-1.11726	0.249389	1	hypothetical protein		Unknown
ECs1778	0.670551	-0.513187	-1.20529	0.215909	1	hypothetical protein		Unknown
ECs1951	0.640953	-0.431884	-1.15677	0.205097	1	hypothetical protein		Unknown
ECs2742	0.675155	-0.716948	-1.22562	0.29914	1	hypothetical protein		Unknown
ECs2759	0.69385	-0.638498	-1.18107	0.232098	1	hypothetical protein		Unknown
ECs2801	0.633631	-0.446126	-1.17102	0.2264	1	hypothetical protein		Unknown
ECs2979	0.639229	-0.775358	-0.950202	0.295909	1	hypothetical protein		Unknown
ECs2983	0.666216	-0.587205	-1.14025	0.239472	1	hypothetical protein		Unknown
ECs2984	0.688042	-0.658977	-1.2248	0.259314	1	hypothetical protein		Unknown
ECs3112	0.630671	-0.387184	-1.22986	0.214079	1	hypothetical protein		Unknown
ECs3503	0.672817	-0.505381	-1.03356	0.160915	1	hypothetical protein		Unknown
ECs3869	0.575244	-0.389379	-1.11427	0.259674	1	hypothetical protein		Unknown
ECs4815	0.700192	-0.636476	-1.22029	0.231592	1	hypothetical protein		Unknown
ECs0160	-0.209599	0.191123	0.214372	-0.330455	1	hypothetical protein		Unknown
ECs0383	-0.159485	0.319309	0.213895	-0.661374	1	hypothetical protein		Unknown
ECs0618	-0.352083	0.231426	0.229735	-0.289938	1	hypothetical protein		Unknown
ECs0646	-0.0637453	0.282706	0.144429	-0.558588	1	hypothetical protein		Unknown
ECs1050	-0.214007	0.257076	0.154631	-0.337497	1	hypothetical protein		Unknown
ECs1154	-0.0339163	0.345801	0.167236	-0.838072	1	hypothetical protein		Unknown
ECs1438	-0.0597792	0.335133	0.127387	-0.658591	1	hypothetical protein		Unknown
ECs2493	0.160043	0.413565	0.172857	-1.98814	1	hypothetical protein		Unknown
ECs2504	-0.0206073	0.27005	0.16276	-0.637422	1	hypothetical protein		Unknown
ECs2614	0.113676	0.148901	0.203287	-0.697115	1	hypothetical protein		Unknown
ECs2970	-0.102746	0.226872	0.187638	-0.471148	1	hypothetical protein		Unknown
ECs3309	0.0288739	0.19045	0.249679	-0.748732	1	hypothetical protein		Unknown
ECs3310	-0.0395034	0.273473	0.188383	-0.674008	1	hypothetical protein		Unknown
ECs3752	0.0283546	0.189931	0.246049	-0.736347	1	hypothetical protein		Unknown
ECs3905	0.0890662	0.330699	0.216111	-1.28538	1	hypothetical protein		Unknown
ECs3981	-0.343823	0.283548	0.320583	-0.592543	1	hypothetical protein		Unknown
ECs4402	0.0696959	0.29998	0.105165	-0.751585	1	hypothetical protein		Unknown
ECs4847	0.0838418	0.270518	0.293517	-1.34682	1	hypothetical protein		Unknown
ECs5039	-0.106708	0.259072	0.204392	-0.569568	1	hypothetical protein		Unknown
ECs5090	-0.438309	0.216638	0.211563	-0.170326	1	hypothetical protein		Unknown
ECs5299	-0.025845	0.263855	0.225069	-0.768534	1	hypothetical protein		Unknown
ECs0439	-0.34818	0.488923	0.104708	-0.636147	1	hypothetical protein		Unknown
ECs0509	-0.149353	0.373941	0.207788	-0.823234	1	hypothetical protein		Unknown
ECs0728	-0.636808	0.520883	0.116651	-0.469067	1	hypothetical protein		Unknown
ECs0864	-0.169464	0.374095	0.24167	-0.889239	1	hypothetical protein		Unknown
ECs1692					1	hypothetical protein		Unknown
ECs1710	-0.431923	0.514887	0.365836	-1.61742	1	hypothetical protein		Unknown
ECs2031	-0.16661	0.527174	0.136798	-1.20501	1	hypothetical protein		Unknown
ECs2691	-0.181921	0.379917	0.149652	-0.64033	1	hypothetical protein		Unknown
ECs2692	-0.501291	0.649818	0.250717	-1.83966	1	hypothetical protein		Unknown
ECs2888	-0.245506	0.520534	0.265515	-1.56988	1	hypothetical protein		Unknown
ECs3022	-0.68338	0.633326	0.257946	-1.29776	1	hypothetical protein		Unknown
ECs3527					1	hypothetical protein		Unknown
ECs3533	-0.472791	0.468792	0.37998	-1.28653	1	hypothetical protein		Unknown
ECs3906	-0.128755	0.403504	0.382366	-1.98088	1	hypothetical protein		Unknown
ECs4366	-0.285046	0.45364	0.37011	-1.62659	1	hypothetical protein		Unknown
ECs5028					1	hypothetical protein		Unknown
ECs5195	-0.551083	0.43625	0.272389	-0.64722	1	hypothetical protein		Unknown
ECs0869	-0.297022	0.143116	0.50152	-0.881697	1	hypothetical protein		Unknown
ECs0982	0.126596	0.0557519	0.35199	-0.953135	1	hypothetical protein		Unknown
ECs2382	-0.468586	0.297618	0.40322	-0.716029	1	hypothetical protein		Unknown
ECs3154	-0.138871	0.162161	0.452423	-1.03208	1	hypothetical protein		Unknown
ECs3520					1	hypothetical protein		Unknown
ECs3521					1	hypothetical protein		Unknown
ECs3982	-0.338477	0.227342	0.37781	-0.619374	1	hypothetical protein		Unknown
ECs4213					1	hypothetical protein		Unknown
ECs5050	-0.0659684	0.277056	0.412876	-1.53293	1	hypothetical protein		Unknown
ECs5294	-0.0209414	0.194818	0.321578	-0.87859	1	hypothetical protein		Unknown
ECs5719	-0.0824407	0.241873	0.107899	-0.380697	1	#N/A		Unknown
ECs5391	-0.0810107	0.205338	0.288623	-0.691188	1	#N/A		Unknown
ECs5737	-0.508132	0.421221	0.356972	-0.90594	1	#N/A		Unknown
ECs5777	-0.309127	0.358962	0.339335	-0.917252	1	#N/A		Unknown
ECs0819	0.593425	-0.569505	-1.20738	0.341913	2	endolysin	prophage	Other category
ECs1100	0.582355	-1.01236	-1.33178	0.508825	2	putative holin protein	prophage	Other category
ECs1621	0.654854	-0.634569	-1.55362	0.355986	2	putative holin protein	prophage	Other category
ECs2261	0.647709	-0.604597	-1.32949	0.314484	2	putative holin protein	prophage	Other category
ECs0727	0.669753	-0.82082	-1.76885	0.42707	2	KdpF protein of high-affinity potassium transport system	two-component	Pathogenicity	Two-component system	Two-component system
ECs3850	0.550282	-0.492741	-1.32683	0.383585	2	putative virulence-related membrane protein	two-component	Pathogenicity	Two-component system	Two-component system
ECs0607	0.63768	-0.763661	-1.67087	0.435439	2	putative Vgr protein	secretion	Pathogenicity		Bacterial secretion system
ECs2107	0.571788	-0.77826	-1.63668	0.504721	2	putative adhesin	adhesin	Pathogenicity	adhesin
ECs2590	0.5397	-0.718541	-1.22029	0.455241	2	flagellar biosynthesis protein FlhB	flagellar	Cell motility	flagellar/fimbrial/curli/pili-related	Flagellar assembly
ECs1523	0.648651	-0.562337	-1.51037	0.328878	2	putative crossover junction endodeoxyribonuclease	SOS response	Nucleotide metabolism and DNA recombination
ECs3315	0.663752	-0.802128	-1.23934	0.345679	2	ethanolamine utilization protein EutG	biosynthesis of antibiotics	Stress response		Biosynthesis of antibiotics
ECs1093	0.585162	-0.438885	-1.72339	0.382921	2	putative endopeptidase	endopeptidase	Amino acid and protein metabolism
ECs4748	0.54407	-0.544782	-1.64982	0.459612	2	hypothetical membrane protein	membrane	Other category
ECs0582	0.653644	-0.738128	-1.32949	0.355611	2	putative carboxylase	carbon metabolism	Other category
ECs2862	0.580522	-0.954351	-0.986095	0.42707	2	putative glycosyl transferase	glycosyl transferase	Other category
ECs3944	0.627298	-0.48838	-1.53172	0.327728	2	L-tartrate dehydratase subunit A	glyoxylate and dicarboxylate	Other category		Glyoxylate and dicarboxylate metabolism
ECs3945	0.688735	-0.656517	-1.47672	0.308011	2	L-tartrate dehydratase subunit B	glyoxylate and dicarboxylate	Other category		Glyoxylate and dicarboxylate metabolism
ECs3157	0.549402	-0.65677	-1.17137	0.415463	2	putative sulfatase / phosphatase	phosphatase	Other category
ECs5081	0.675832	-0.415355		0.390703	2	phosphonate metabolism	phosphonate	Other category		Phosphonate and phosphinate metabolism
ECs0403	0.503981	-0.587205	-1.08895	0.419523	2	2,3-dihydroxyphenylpropionate 1,2-dioxygenase	phenylalanine	Amino acid and protein metabolism		Phenylalanine metabolism
ECs0593	0.628111	-0.311676	-1.6427	0.25597	2	putative chaperone	chaperone	Other category
ECs1611	0.620669	-0.477487	-1.46474	0.319987	2	putative replication protein	replication	Nucleotide metabolism and DNA recombination
ECs5158	0.578272	-0.714336	-1.53454	0.466415	2	putative alpha helical protein	alpha helical	Nucleotide metabolism and DNA recombination
ECs0300	0.5819	-0.65589	-1.23418	0.392999	2	putative CI repressor	CI repressor	Transcription and RNA processing
ECs4621	0.599518	-0.899152	-1.074	0.413277	2	putative ARAC-type regulatory protein	TF	Transcription and RNA processing
ECs0797	0.6828	-0.628929	-1.91344	0.364727	2	hypothetical protein		Unknown
ECs0824	0.597763	-0.747489	-1.23122	0.405091	2	hypothetical protein		Unknown
ECs0950	0.58889	-0.45828	-1.35502	0.330078	2	hypothetical protein		Unknown
ECs2740	0.661867	-0.755223	-1.5289	0.385037	2	hypothetical protein		Unknown
ECs2977	0.66848	-0.679617	-1.36814	0.323739	2	hypothetical protein		Unknown
ECs2978	0.647774	-0.842799	-1.23122	0.376104	2	hypothetical protein		Unknown
ECs3728	0.521895	-0.564811	-1.18107	0.413193	2	hypothetical protein		Unknown
ECs4591	0.558628	-0.501787	-1.31369	0.375729	2	hypothetical protein		Unknown
ECs5159	0.535786	-0.767575	-1.02246	0.431525	2	hypothetical protein		Unknown
ECs5160	0.5397	-0.520715	-1.09146	0.356801	2	hypothetical protein		Unknown
ECs5716	0.53065	-0.603096	-1.37244	0.453739	2	#N/A		Unknown
ECs5740	0.550282	-0.681983	-1.32683	0.452578	2	#N/A		Unknown
ECs1451	-0.0356646	-0.440673	-1.42793	0.773695	3	flagellar rod protein FlgB	flagellar	Cell motility	flagellar/fimbrial/curli/pili-related	Flagellar assembly
ECs1453	0.0450033	-0.545408	-1.06963	0.718231	3	flagellar biosynthesis FlgD protein	flagellar	Cell motility	flagellar/fimbrial/curli/pili-related	Flagellar assembly
ECs1455	0.0437204	-0.677719	-1.40261	0.799013	3	flagellar rod protein flgF	flagellar	Cell motility	flagellar/fimbrial/curli/pili-related	Flagellar assembly
ECs1456	0.136387	-0.892279	-0.924022	0.728816	3	flagellar basal body rod protein flgG	flagellar	Cell motility	flagellar/fimbrial/curli/pili-related	Flagellar assembly
ECs1460	-0.149183	-0.677719	-0.932606	0.80656	3	flagellar hook-filament junction protein 1 FlgK	flagellar	Cell motility	flagellar/fimbrial/curli/pili-related	Flagellar assembly
ECs2109	0.153914	-1.39201	-1.82922	0.899015	3	putative fimbrial-like protein	flagellar	Cell motility	flagellar/fimbrial/curli/pili-related
ECs2663	-0.00199601	-0.696767	-1.15929	0.791264	3	flagellar capping protein FliD	flagellar	Cell motility	flagellar/fimbrial/curli/pili-related	Flagellar assembly
ECs2664	0.00400066	-0.619886	-1.06779	0.756202	3	flagellar protein FliS	flagellar	Cell motility	flagellar/fimbrial/curli/pili-related	Flagellar assembly
ECs2689	-0.172096	-0.390268	-0.964876	0.743212	3	flagellar biosynthetic protein FliR	flagellar	Cell motility	flagellar/fimbrial/curli/pili-related	Flagellar assembly
ECs2593	0.132754	-0.863122	-1.30033	0.784928	3	response regulator for chemotaxis CheA sensor	chemotaxis	Stress response		Bacterial chemotaxis
ECs2594	-0.105246	-0.666669	-0.798496	0.761272	3	response regulator for chemotaxis	chemotaxis	Stress response		Bacterial chemotaxis
ECs2595	-0.0793397	-0.677719	-0.837296	0.761972	3	methyl-accepting chemotaxis protein IV	chemotaxis	Stress response		Bacterial chemotaxis
ECs2596	0.0316364	-0.642656	-0.807931	0.698919	3	methyl-accepting chemotaxis protein II	chemotaxis	Stress response		Bacterial chemotaxis
ECs2598	0.0280232	-0.569505	-0.989014	0.71839	3	sensory transducer kinase CheA	chemotaxis	Stress response		Bacterial chemotaxis
ECs2599	0.0145766	-0.798978	-1.1184	0.800016	3	chemotaxis protein MotB	chemotaxis	Stress response		Bacterial chemotaxis
ECs4327	-0.161833	-0.590603	-0.819706	0.768176	3	putative acyltransferase	chemotaxis	Stress response
ECs2600	-0.0673017	-0.505832	-0.766417	0.695538	3	proton conductor component of motor	chemotaxis	Stress response		Bacterial chemotaxis
ECs1139	-0.139596	-0.707338	-0.928323	0.808961	3	putative function in exopolysaccharide production	biofilm	Pathogenicity	Biofilm formation	Biofilm formation - Escherichia coli
ECs2661	-0.11773	-0.774631	-0.716762	0.772041	3	transcription initiation factor alternative sigma factor 28	biofilm	Pathogenicity	sigma-related	Biofilm formation - Escherichia coli
ECs2937	0.00112687	-0.763167	-0.50513	0.661427	3	putative 2-component sensor protein	two-component	Pathogenicity	Two-component system
ECs2884	-0.0844548	-0.482494	-0.747852	0.691288	3	hypothetical protein	two-component	Pathogenicity	Two-component system	Two-component system
ECs4583	0.0822747	-0.467315	-1.19221	0.697194	3	type III secretion system EscR protein	T3SS	Pathogenicity	T3SS	Bacterial secretion system
ECs0101	-0.150318	-0.503107	-0.767278	0.728518	3	hypothetical protein	secretion	Pathogenicity		Bacterial secretion system
ECs4301					3	ATP-binding component of leucine transport	quorum sensing	Pathogenicity	Quorum sensing	Quorum sensing
ECs4302	-0.133245	-0.411281	-0.86076	0.714461	3	ATP-binding component of high-affinity branched-chain amino acid transport system	quorum sensing	Pathogenicity	Quorum sensing	Quorum sensing
ECs4305	0.00543399	-0.627152	-0.92126	0.730922	3	periplasmic binding protein of high-affinity leucine-specific transport system	quorum sensing	Pathogenicity	Quorum sensing	Quorum sensing
ECs4588	0.0131671	-0.732738	-0.987625	0.765158	3	Ler protein	quorum sensing	Pathogenicity	Quorum sensing	Quorum sensing
ECs0661	0.096963	-0.59087	-1.03391	0.699303	3	hypothetical protein	cationic antimicrobial peptide	Stress response		Cationic antimicrobial peptide (CAMP resistance
ECs0083	0.12759	-0.807662	-0.810418	0.691543	3	fruR leader peptide	pathogenicity	Pathogenicity
ECs2110	0.118486	-1.1598	-1.73808	0.881326	3	putative outer membrane protein	outer membrane protein	Pathogenicity	outer membrane protein
ECs4437	-0.0480871	-0.393376	-0.970346	0.695521	3	putative outer membrane protein	outer membrane protein	Pathogenicity	outer membrane protein
ECs0960	-0.0890823	-0.369339	-0.880655	0.686661	3	putative surface protein	outer membrane protein	Pathogenicity
ECs4331	-0.0565978	-0.503908	-0.823334	0.703491	3	putative surfactin synthetase	surfactin	Other category
ECs0772	-0.0556123	-0.517898	-0.702186	0.678143	3	inner membrane protein TolQ	membrane	Cell division
ECs4330	-0.130264	-0.842372	-0.955794	0.8377	3	hypothetical membrane protein	membrane	Other category
ECs4336	-0.153448	-0.652887	-0.875686	0.791713	3	hypothetical membrane protein	membrane	Other category
ECs5258	-0.00674577	-0.554468	-0.747852	0.678385	3	putative membrane protein	membrane	Other category
ECs2268	0.549269	-0.78308	-0.814823	0.364727	3	putative crossover junction endodeoxyribonuclease	SOS response	Nucleotide metabolism and DNA recombination
ECs2303	0.578053	-0.98947	-0.815605	0.391233	3	acid shock protein	acid shock protein	Stress response
ECs3819	0.0617907	-0.596103	-0.825377	0.675757	3	galactose-proton symport of transport system	galactose	Transport
ECs2850					3	putative galactokinase	galactose	Other category
ECs2899	0.49578	-0.703037	-0.416327	0.233074	3	tagatose-bisphosphate aldolase 1	galactose	Carbohydrate metabolism		Galactose metabolism
ECs3959	0.00373795	-0.739142	-0.713727	0.713232	3	evolved beta-D-galactosidase beta subunit	galactose	Carbohydrate metabolism		Galactose metabolism
ECs4354	0.655871	-0.688648	-0.692221	0.14558	3	phosphotransferase system HPr enzyme	energy metabolism	Other category
ECs4332	0.149739	-0.703037	-0.917102	0.678385	3	putative (3R)-hydroxymyristoyl-[acyl carrier protein] dehydratase	fatty acid metabolism	Transport
ECs4338	-0.175427	-0.542694	-0.874542	0.771717	3	putative 3-oxoacyl-(acyl-carrier-protein) synthase II	fatty acid metabolism	Other category		Fatty acid metabolism
ECs2866	0.103597	-0.604597	-1.32949	0.745076	3	probable protein-tyrosine-phosphatase	phosphatase	Amino acid and protein metabolism
ECs5078	0.151042	-0.755223	-0.941117	0.695192	3	phosphonate metabolism	phosphonate	Other category		Phosphonate and phosphinate metabolism
ECs5082	0.0854443	-1.15729	-2.79847	0.941969	3	phosphonate metabolism	phosphonate	Other category		Phosphonate and phosphinate metabolism
ECs5079	0.0450033	-0.950873	-2.36891	0.916056	3	ATP-binding component of phosphonate transport	phosphonate	Transport		Phosphonate and phosphinate metabolism
ECs0647	0.115989	-0.592205	-0.985739	0.680875	3	putative oxidoreductase	oxidoreductase	Other category
ECs3941	0.0677673	-0.612819	-0.965661	0.706877	3	putative kinase	folate	Other category		Folate biosynthesis
ECs0488	-0.215483	-0.766674	-0.693057	0.799559	3	putative polymerase/proteinase	proteinase	Amino acid and protein metabolism
ECs0993	-0.00608515	-0.688546	-0.641625	0.686783	3	cytidylate kinase	kinase	Nucleotide metabolism and DNA recombination		Pyrimidine metabolism
ECs2478	-0.0300935	-0.592105	-0.924954	0.738023	3	putative transposase OrfB protein of insertion sequence IS629	transposase OrfB protein of insertion sequence IS629	Nucleotide metabolism and DNA recombination
ECs3688					3	methyl-directed mismatch repair	mismatch repair	Nucleotide metabolism and DNA recombination		Mismatch repair
ECs4133	-0.100167	-0.484015	-0.795344	0.709483	3	site-specific DNA inversion stimulation factor	DNA inversion	Nucleotide metabolism and DNA recombination
ECs5168	-0.00842186	-0.598833	-0.89086	0.72359	3	hypothetical protein	ascorbate and aldarate metabolism	Other category		Ascorbate and aldarate metabolism
ECs0579	0.5397	-0.703037	-0.670242	0.297612	3	ureidoglycolate dehydrogenase	purine	Nucleotide metabolism and DNA recombination		Purine metabolism
ECs3741	0.63814	-0.767116	-0.54103	0.132468	3	putative dehydrogenase	purine	Nucleotide metabolism and DNA recombination		Purine metabolism
ECs0284	0.653144	-0.716109	-0.80192	0.20578	3	DNA-invertase	DNA-invertase	Nucleotide metabolism and DNA recombination
ECs0324	0.0574473	-0.583516	-1.03942	0.717606	3	putative regulator	TF	Transcription and RNA processing
ECs2328	-0.0281264	-0.623822	-0.860661	0.732452	3	repressor of malX and Y genes	TF	Transcription and RNA processing
ECs3100	-0.146575	-0.624799	-0.884802	0.784297	3	putative ATP-binding component of a transport system	ABC transporter	Transport	ABC transporter	ABC transporters
ECs0922	-0.19891	-0.415355	-0.957924	0.759453	3	proton motive force efflux pump	transport	Transport
ECs4797					3	hypothetical protein		Unknown
ECs5011	0.5397	-1.08033	-0.824393	0.455241	3	hypothetical protein		Unknown
ECs0085	0.0275189	-0.762308	-0.613168	0.681089	3	hypothetical protein		Unknown
ECs0222	0.0593331	-0.895721	-1.03283	0.785805	3	hypothetical protein		Unknown
ECs0340	0.00111466	-0.700159	-1.46014	0.827997	3	hypothetical protein		Unknown
ECs1346	-0.0908548	-0.548203	-0.701836	0.702027	3	hypothetical protein		Unknown
ECs1348	-0.192668	-0.638498	-0.814823	0.78988	3	hypothetical protein		Unknown
ECs1350	-0.129871	-0.818834	-1.37942	0.890735	3	hypothetical protein		Unknown
ECs1855	0.0649678	-0.546194	-1.05441	0.706294	3	hypothetical protein		Unknown
ECs2289	-0.0492408	-0.81938	-0.949027	0.80214	3	hypothetical protein		Unknown
ECs2335	-0.0415572	-0.696042	-0.750343	0.731688	3	hypothetical protein		Unknown
ECs2396	0.0263455	-0.86734	-0.42908	0.647613	3	hypothetical protein		Unknown
ECs2711	-0.006989	-0.696157	-0.57074	0.668958	3	hypothetical protein		Unknown
ECs3066	-0.204547	-0.775727	-0.776218	0.816059	3	hypothetical protein		Unknown
ECs3068	-0.137054	-0.685018	-0.783901	0.774446	3	hypothetical protein		Unknown
ECs3123	-0.0940242	-0.723656	-0.7554	0.760623	3	hypothetical protein		Unknown
ECs3138	0.0616638	-0.441992	-1.19546	0.699867	3	hypothetical protein		Unknown
ECs3965	0.0624004	-0.718736	-0.94554	0.73196	3	hypothetical protein		Unknown
ECs3978	-0.225287	-0.715177	-0.706182	0.794826	3	hypothetical protein		Unknown
ECs4333	-0.153448	-0.77203	-0.852563	0.813304	3	hypothetical protein		Unknown
ECs4334	-0.158563	-0.682834	-0.888931	0.802948	3	hypothetical protein		Unknown
ECs4335	0.0811246	-1.05262	-1.08437	0.810958	3	hypothetical protein		Unknown
ECs4584	0.0146893	-0.845055	-1.21327	0.822424	3	hypothetical protein		Unknown
ECs4585	-0.0971388	-0.655128	-1.19565	0.82411	3	hypothetical protein		Unknown
ECs4586	-0.0386531	-0.692039	-1.39224	0.834565	3	hypothetical protein		Unknown
ECs4587	-0.0360777	-0.670127	-1.13653	0.795755	3	hypothetical protein		Unknown
ECs5464	-0.0575368	-0.609438	-0.686644	0.701005	3	#N/A		Unknown
ECs0002	-0.397026	-0.140716	-0.461102	0.594013	4	aspartokinase I-homoserine dehydrogenase I	biosynthesis of antibiotics	Stress response		Biosynthesis of antibiotics
ECs0527	-0.404489	-0.409779	-0.308398	0.648627	4	adenylate kinase	biosynthesis of antibiotics	Stress response		Biosynthesis of antibiotics
ECs1832	-0.699936	-0.385556	-0.09079	0.626014	4	tryptophan synthase alpha protein	biosynthesis of antibiotics	Stress response		Biosynthesis of antibiotics
ECs1833	-0.706686	-0.413108	-0.217005	0.694564	4	tryptophan synthase beta protein	biosynthesis of antibiotics	Stress response		Biosynthesis of antibiotics
ECs2411	-0.402144	-0.305026	-0.440567	0.65853	4	3-deoxy-D-arabinoheptulosonate-7-phosphate synthase	biosynthesis of antibiotics	Stress response		Biosynthesis of antibiotics
ECs3675	-0.815563	-0.136719	-0.100213	0.552485	4	N-acetylglutamate synthase	biosynthesis of antibiotics	Stress response		Biosynthesis of antibiotics
ECs3774	-0.33734	-0.244083	-0.39361	0.594935	4	glycine decarboxylase	biosynthesis of antibiotics	Stress response		Biosynthesis of antibiotics
ECs4052	-0.756523	-0.116699	-0.364618	0.647728	4	argininosuccinate synthetase	biosynthesis of antibiotics	Stress response		Biosynthesis of antibiotics
ECs4886	-0.470185	-0.156964	-0.142042	0.4857	4	acetylornithine deacetylase	biosynthesis of antibiotics	Stress response		Biosynthesis of antibiotics
ECs4887	-0.949562	-0.158794	-0.357591	0.702294	4	N-acetyl-gamma-glutamylphosphate reductase	biosynthesis of antibiotics	Stress response		Biosynthesis of antibiotics
ECs4889	-1.01675	-0.0857085	-0.246799	0.63813	4	argininosuccinate lyase	biosynthesis of antibiotics	Stress response		Biosynthesis of antibiotics
ECs5231					4	ornithine carbamoyltransferase 1	biosynthesis of antibiotics	Stress response		Biosynthesis of antibiotics
ECs4210					4	acetylornithine delta-aminotransferase	biosynthesis of antibiotics	Stress response		Biosynthesis of antibiotics
ECs3776	-1.17415	-1.41149	-1.40597	1.1515	4	aminomethyltransferase	biosynthesis of antibiotics	Stress response		Biosynthesis of antibiotics
ECs0411	-0.429273	-0.394113	-0.670242	0.763888	4	alcohol dehydrogenase class III	biosynthesis of antibiotics	Stress response		Biosynthesis of antibiotics
ECs0585	-0.341309	-0.356356	-0.63496	0.71633	4	phosphoribosylaminoimidazole carboxylase	biosynthesis of antibiotics	Stress response		Biosynthesis of antibiotics
ECs4708	-0.4344	-0.623419	-0.63496	0.819027	4	ketol-acid reductoisomerase	biosynthesis of antibiotics	Stress response		Biosynthesis of antibiotics
ECs4888	-0.711549	-0.409843	-0.610383	0.82057	4	acetylglutamate kinase	biosynthesis of antibiotics	Stress response		Biosynthesis of antibiotics
ECs2690	-0.377154	-0.134452	-0.381716	0.553822	4	transcriptional regulator for ctr capsule biosynthesis	biofilm	Pathogenicity	Biofilm formation	Biofilm formation - Escherichia coli
ECs1449	-0.206054	-0.620653	-0.694069	0.763316	4	flagellin synthesis regulatory protein sigma-28 inhibitor flgM	biofilm	Pathogenicity	sigma-related	Biofilm formation - Escherichia coli
ECs2602	-0.305594	-0.738675	-0.494713	0.771305	4	regulator of flagellar biosynthesis FlhD	biofilm	Pathogenicity	Biofilm formation	Biofilm formation - Escherichia coli
ECs3107	-0.26235	-0.455695	-0.49956	0.683195	4	sensor for ctr capsule biosynthesis	biofilm	Pathogenicity	Biofilm formation	Biofilm formation - Escherichia coli
ECs4054	-0.534584	-0.272074	-0.317699	0.640371	4	protein-export protein SecG	quorum sensing	Pathogenicity	Quorum sensing	Quorum sensing
ECs4640	-0.303827	-0.400196	-0.5758	0.702437	4	60 KD inner-membrane protein	quorum sensing	Pathogenicity	Quorum sensing	Quorum sensing
ECs2112	-0.328279	-1.77934	-2.2464	1.0996	4	putative fimbrial chaperone protein precursor	fimbrial	Cell motility	flagellar/fimbrial/curli/pili-related
ECs2113	-2.0267	-2.8779	-2.4974	1.30285	4	putative type 1 fimbrial protein precursor	fimbrial	Cell motility	flagellar/fimbrial/curli/pili-related
ECs2314	-1.25432	-1.73453	-1.56956	1.19082	4	response transcriptional regulatory protein RstB sensor	two-component	Pathogenicity	Two-component system	Two-component system
ECs2315	-1.26134	-1.7188	-1.79222	1.20343	4	sensor histidine protein kinase RstA regulator	two-component	Pathogenicity	Two-component system	Two-component system
ECs2662	-0.997839	-1.33434	-1.21627	1.11058	4	flagellin	two-component	Pathogenicity	flagellar/fimbrial/curli/pili-related	Two-component system
ECs5224	-0.407363	-0.129493	-0.643334	0.65011	4	pyrBI operon leader peptide	pathogenicity	Nucleotide metabolism and DNA recombination
ECs1837	-1.58077	-1.24627	-1.14932	1.14441	4	trp operon leader peptide	pathogenicity	Amino acid and protein metabolism
ECs4626	-0.861894	-1.1238	-1.53388	1.10134	4	heat shock protein IbpB	heat shock protein	Stress response	HSP
ECs2539	-0.675808	-0.338423	-0.3135	0.699936	4	heat shock protein HtpX	heat shock protein	Stress response	HSP
ECs4441	-0.381188	-0.271113	-0.188489	0.533017	4	cold shock protein 7.4	cold shock protein	Stress response
ECs1354	-0.49275	-0.397983	-0.255773	0.650295	4	putative tellurium resistance protein TerC	tellurium resistance	Pathogenicity
ECs3399	-0.416676	-0.205774	-0.634615	0.683553	4	extragenic suppressor protein SuhB	streptomycin	Stress response		Streptomycin biosynthesis
ECs2449	-0.413213	-0.543811	-0.531672	0.766446	4	spheroplast protein Y	inhibitor of the extracytoplasmic stress response	Other category
ECs3144	-0.69298	-0.702015	-0.180782	0.756721	4	hypothetical protein	cationic antimicrobial peptide	Stress response		Cationic antimicrobial peptide (CAMP resistance
ECs3674	-0.461332	-0.389687	-0.451106	0.709883	4	putative amidase	cationic antimicrobial peptide	Stress response		Cationic antimicrobial peptide (CAMP resistance
ECs4425	-0.301944	-0.484184	-0.367762	0.661422	4	hypothetical protein	cationic antimicrobial peptide	Stress response		Cationic antimicrobial peptide (CAMP resistance
ECs4783	-0.661192	-0.337349	-0.397217	0.725746	4	protein disulfide isomerase I	cationic antimicrobial peptide	Stress response		Cationic antimicrobial peptide (CAMP resistance
ECs0673	-0.263639	-0.611218	-0.759599	0.79512	4	peptidoglycan synthetase penicillin-binding protein 2	beta-Lactam resistance	Stress response		beta-Lactam resistance
ECs4238	-0.376979	-0.372795	-0.590438	0.720944	4	peptidoglycan synthetase	beta-Lactam resistance	Stress response		beta-Lactam resistance
ECs1351	-0.404975	-0.305764	-0.587906	0.705477	4	putative tellurium resistance protein TerZ	tellurium resistance	Stress response
ECs1353	-0.572743	-0.563097	-0.578711	0.824404	4	putative tellurium resistance protein TerB	tellurium resistance	Stress response
ECs0051	-0.339995	-0.432366	-0.431557	0.68019	4	dihydrofolate reductase type I; trimethoprim resistance	trimethoprim resistance	Stress response		Folate biosynthesis
ECs4884	-0.395961	-0.658499	-0.529619	0.789767	4	membrane protein	lipopolysaccharide	Stress response		Lipopolysaccharide biosynthesis
ECs0177					4	CDP-diglyceride synthetase	glycerophospholipid	Other category		Glycerophospholipid metabolism
ECs4269	-0.320897	-0.22653	-0.507874	0.622221	4	sn-glycerol-3-phosphate dehydrogenase	glycerophospholipid	Other category		Glycerophospholipid metabolism
ECs5025	-0.622775	-0.328005	-0.281137	0.67092	4	diacylglycerol kinase	glycerophospholipid	Other category		Glycerolipid metabolism
ECs3126	-0.600104	-1.32772	-1.07916	1.0382	4	anaerobic sn-glycerol-3-phosphate dehydrogenase large subunit	glycerophospholipid	Other category		Glycerophospholipid metabolism
ECs0892	-0.683692	-0.378212	-0.184911	0.663689	4	outer membrane protein X	outer membrane protein	Pathogenicity	outer membrane protein
ECs3197	-0.393274	-0.491728	-0.221605	0.636337	4	membrane protein required for colicin V production	membrane	Other category
ECs3272	-0.464064	-0.290415	-0.148074	0.55009	4	permease of transport system for 3 nucleosides	membrane	Transport
ECs2338	-0.211017	-0.408386	-0.727812	0.712752	4	putative membrane protein	membrane	Other category
ECs0518	-0.338723	-0.394916	-0.392565	0.653496	4	mechanosensitive channel protein	membrane	Transport
ECs4680	-0.437005	-0.578603	-0.368482	0.731961	4	membrane-bound ATP synthase subunit a AtpB	oxidative phosphorylation	Other category		Oxidative phosphorylation
ECs4328	-0.300308	-0.572437	-0.697438	0.782965	4	putative acyl carrier protein	fatty acid metabolism	Other category
ECs4324	-0.354754	-0.573602	-0.501711	0.748631	4	hypothetical lipoprotein	lipoprotein	Other category
ECs4337	-0.261661	-0.495397	-0.601249	0.724905	4	hypothetical lipoprotein	lipoprotein	Other category
ECs3067	-0.37064	-0.385389	-0.123442	0.543587	4	putative lipoprotein	lipoprotein	Transport
ECs5172	-0.531884	-0.586777	-0.440272	0.782375	4	probable hexulose-6-phosphate synthase	hexulose	Other category		Ascorbate and aldarate metabolism
ECs5340	-0.247141	-0.370481	-0.729791	0.713649	4	2-deoxyribose-5-phosphate aldolase	phosphonate; pentose	Carbohydrate metabolism		Pentose phosphate pathway
ECs0176	-0.169785	-0.640799	-0.50857	0.704996	4	undecaprenyl pyrophosphate synthetase	phosphonate	Other category		Terpenoid backbone biosynthesis
ECs5075	-0.384559	-0.464145	-0.67821	0.774176	4	phosphonate metabolism	phosphonate	Other category		Phosphonate and phosphinate metabolism
ECs5083	-0.0915722	-1.37513	-2.50549	1.01789	4	phosphonate metabolism	phosphonate	Other category		Phosphonate and phosphinate metabolism
ECs5084	-0.552834	-1.64402	-2.36891	1.1392	4	phosphonate metabolism	phosphonate	Other category		Phosphonate and phosphinate metabolism
ECs5080	-0.227556	-1.08033	-2.21069	1.01486	4	ATP-binding component of phosphonate transport	phosphonate	Transport
ECs1138	-0.308977	-0.368084	-0.50669	0.672464	4	putative phosphatase	phosphatase	Other category
ECs4132	-0.300459	-0.588485	-0.74618	0.798101	4	putative dehydrogenase	dehydrogenase	Other category
ECs4240	-0.452523	-0.61912	-0.47107	0.779204	4	putative dehydrogenase	dehydrogenase	Other category
ECs4339	-0.234793	-0.541769	-0.573512	0.721205	4	putative beta-hydroxydecanoyl-ACP dehydrase	dehydrase	Other category
ECs5226	-0.769521	-0.244252	-0.989869	0.856302	4	putative oxidoreductase	oxidoreductase	Other category
ECs0026					4	30S ribosomal subunit protein S20	30S ribosome	Transcription and RNA processing		Ribosome
ECs4065	-0.334854	-0.307581	-0.289111	0.578247	4	50S ribosomal subunit protein L21	50S ribosome	Transcription and RNA processing		Ribosome
ECs4512					4	50S ribosomal subunit protein L28	50S ribosome	Transcription and RNA processing		Ribosome
ECs4638	-0.299585	-0.246958	-0.104952	0.443414	4	50S ribosomal subunit protein L34	50S ribosome	Transcription and RNA processing		Ribosome
ECs0715	-0.333702	-0.271426	-0.247745	0.543907	4	flavodoxin 1	flavodoxin	Other category
ECs1652	-0.573079	-0.280162	-0.0743889	0.540973	4	putative catalase	catalase	Other category
ECs2491	-0.312227	-0.195815	-0.21476	0.483638	4	putative scaffolding protein in the formation of a murein-synthesizing holoenzyme	murein	Other category
ECs3620	-0.611029	-0.32289	-0.337683	0.687716	4	putative 6-pyruvoyl tetrahydrobiopterin synthase	folate	Other category		Folate biosynthesis
ECs3080	-0.401213	-0.300089	-0.429161	0.652409	4	putative sulfatase	sulfatase	Other category
ECs4319	-0.492955	-0.259906	-0.393988	0.65229	4	hypothetical protein	sulfur relay system	Other category		Sulfur relay system
ECs0704	-0.295897	-0.375482	-0.636905	0.708437	4	asparagine synthetase B	asparagine	Amino acid and protein metabolism		Alanine, aspartate and glutamate metabolism
ECs0003	-0.348807	-0.224863	-0.355563	0.575707	4	homoserine kinase	homoserine kinase	Amino acid and protein metabolism		Biosynthesis of amino acids
ECs0004	-0.337941	-0.257184	-0.390181	0.599426	4	threonine synthase	threonine synthase	Amino acid and protein metabolism		Biosynthesis of amino acids
ECs1836	-1.93382	-1.0913	-1.14254	1.14634	4	anthranilate synthase component I	anthranilate	Amino acid and protein metabolism		Biosynthesis of amino acids
ECs0075	-0.199483	-0.607572	-0.585249	0.729678	4	isopropylmalate isomerase subunit	isopropylmalate	Amino acid and protein metabolism		Biosynthesis of amino acids
ECs0076	-0.406283	-0.492741	-0.649188	0.781402	4	3-isopropylmalate isomerase (dehydratase) subunit	isopropylmalate	Amino acid and protein metabolism		Biosynthesis of amino acids
ECs0077	-0.379378	-0.370016	-0.526214	0.702217	4	3-isopropylmalate dehydrogenase	isopropylmalate	Amino acid and protein metabolism		Biosynthesis of amino acids
ECs0078	-0.258174	-0.33776	-0.643702	0.684074	4	2-isopropylmalate synthase	isopropylmalate	Amino acid and protein metabolism		Biosynthesis of amino acids
ECs3360	-0.123485	-0.376994	-0.825013	0.691336	4	uracil phosphoribosyltransferase	pyrimidine	Nucleotide metabolism and DNA recombination		Pyrimidine metabolism
ECs0036	-1.08637	-0.18917	-0.364326	0.739109	4	carbamoyl-phosphate synthase large subunit	pyrimidine	Nucleotide metabolism and DNA recombination		Pyrimidine metabolism
ECs0265	-0.441553	-0.0527256	-0.245273	0.471625	4	guanine-hypoxanthine phosphoribosyltransferase	purine	Nucleotide metabolism and DNA recombination		Purine metabolism
ECs4239	-0.323625	-0.252514	-0.185476	0.500811	4	hypothetical protein	purine	Nucleotide metabolism and DNA recombination		Purine metabolism
ECs0588	-0.325917	-0.435355	-0.413989	0.670432	4	cysteine tRNA synthetase	cysteine	Nucleotide metabolism and DNA recombination		Aminoacyl-tRNA biosynthesis
ECs2744	-0.387612	-0.549662	-0.455063	0.737953	4	putative transposase OrfA protein of insertion sequence IS629	transposase OrfA protein of insertion sequence IS629	Nucleotide metabolism and DNA recombination
ECs3994	-0.269154	-0.882039	-0.407512	0.762621	4	putative formate acetyltransferase 3	pyruvate	Other category		Pyruvate metabolism
ECs0457	-0.247576	-0.64817	-0.464472	0.721676	4	tRNA-guanine transglycosylase	guanine	Transcription and RNA processing
ECs0147	-0.350021	-0.329523	-0.485565	0.665726	4	poly(A) polymerase I	RNA degradation	Transcription and RNA processing		RNA degradation
ECs0875	-0.329288	-0.281661	-0.555498	0.662657	4	putative ATP-dependent RNA helicase	RNA degradation	Transcription and RNA processing		RNA degradation
ECs0063	-0.304542	-0.0916032	-0.63176	0.593041	4	probable ATP-dependent RNA helicase	RNA helicase	Transport
ECs4852	-0.396772	-1.43303	-1.26707	1.02841	4	glycerol facilitator protein	glycerol	Other category
ECs2712	-0.184187	-0.274411	-0.859772	0.686052	4	putative cytochrome	cytochrome	Other category
ECs1830	-0.93538	-1.23735	-1.2653	1.09933	4	putative structural proteins	cell division	Cell division
ECs3966	-0.308025	-0.301843	-0.546509	0.66032	4	putative enzyme	enzyme	Other category
ECs0963	-1.29582	-1.52848	-1.33258	1.16411	4	putative enzyme	enzyme	Other category
ECs4136	-0.177908	-1.30054	-1.8077	1.00525	4	putative transcriptional regulator	TF	Transcription and RNA processing
ECs0649	-0.636904	-0.388437	-0.00877151	0.566569	4	regulator of nucleoside diphosphate kinase	TF	Transcription and RNA processing
ECs0501	-0.283232	-0.690666	-0.589561	0.779587	4	putative LRP-like transcriptional regulator	TF	Transcription and RNA processing
ECs5167	-0.177727	-0.484702	-0.6409	0.702088	4	putative DEOR-type transcriptional regulator	TF	Transcription and RNA processing
ECs0943					4	arginine 3rd transport system periplasmic binding protein	ABC transporter	Transport	ABC transporter	ABC transporters
ECs1495	-0.299496	-0.236999	-0.282076	0.530809	4	putative ATP-binding component of a transport system	ABC transporter	Transport	ABC transporter	ABC transporters
ECs0502	-0.408003	-0.422348	-0.613519	0.752244	4	ATP-binding component of a transport system	ABC transporter	Transport	ABC transporter	ABC transporters
ECs0944	-0.382101	-0.344517	-0.455485	0.67177	4	arginine 3rd transport system permease protein	ABC transporter	Transport	ABC transporter	ABC transporters
ECs1494	-0.339212	-0.352106	-0.500021	0.674942	4	hypothetical protein	ABC transporter	Transport	ABC transporter	ABC transporters
ECs4073					4	hypothetical protein	ABC transporter	Transport	ABC transporter	ABC transporters
ECs2816	-0.48577	-0.266863	-0.709463	0.746037	4	putative amino acid/amine transport protein	transport	Transport
ECs1054	-0.462532	-0.395706	-0.309441	0.662131	4	putative carrier/transport protein	transport	Transport
ECs2369	-0.431876	-0.207466	-0.455098	0.633571	4	putative transport protein	transport	Transport
ECs2525	-0.474678	-0.104688	-0.251638	0.515665	4	putative transport protein	transport	Transport
ECs5219	-0.385441	-1.3405	-1.68239	1.05253	4	Mg2+ transport ATPase	transport	Transport
ECs4135	-0.904501	-1.3705	-1.49097	1.12668	4	putative transport protein	transport	Transport
ECs1721	-0.330378	-0.278267	-0.550005	0.660036	4	sodium-calcium/proton antiporter	transport	Transport
ECs0983	-0.337333	-0.18536	-0.656663	0.655468	4	putative transport	transport	Transport
ECs3970	-0.426741	-0.431291	-0.499849	0.728492	4	putative transport protein	transport	Transport
ECs0251	-0.196512	-0.426547	-0.598411	0.679095	4	hypothetical protein		Unknown
ECs0285	-0.00795641	-0.747305	-0.372958	0.615655	4	hypothetical protein		Unknown
ECs0674	-0.330215	-0.406784	-0.694586	0.744504	4	hypothetical protein		Unknown
ECs0675	-0.391001	-0.441186	-0.540589	0.733027	4	hypothetical protein		Unknown
ECs0915	-0.203428	-0.514	-0.653732	0.723715	4	hypothetical protein		Unknown
ECs1137	-0.304164	-0.377105	-0.484486	0.666851	4	hypothetical protein		Unknown
ECs2336	-0.364079	-0.466393	-0.561398	0.738438	4	hypothetical protein		Unknown
ECs2339	-0.386145	-0.445928	-0.733197	0.782159	4	hypothetical protein		Unknown
ECs2340	-0.425291	-0.584126	-0.657981	0.812642	4	hypothetical protein		Unknown
ECs2495	-0.43494	-0.417283	-0.452895	0.711858	4	hypothetical protein		Unknown
ECs3531	-0.716351	-0.428572	-0.450653	0.78371	4	hypothetical protein		Unknown
ECs3977	-0.302663	-0.472342	-0.648741	0.744281	4	hypothetical protein		Unknown
ECs4069	-0.142649	-0.54487	-0.628012	0.702734	4	hypothetical protein		Unknown
ECs4326	-0.255863	-0.38571	-0.585445	0.68368	4	hypothetical protein		Unknown
ECs4535	-0.172618	-0.400992	-0.653209	0.676575	4	hypothetical protein		Unknown
ECs5225	-0.395205	-0.337007	-0.666383	0.734485	4	hypothetical protein		Unknown
ECs0429	-1.30655	-1.22913	-1.12521	1.12103	4	hypothetical protein		Unknown
ECs1488	-0.868256	-1.10565	-1.51754	1.09897	4	hypothetical protein		Unknown
ECs3037	-0.467766	-1.71583	-1.65947	1.09573	4	hypothetical protein		Unknown
ECs3270	-1.20845	-1.01816	-1.44327	1.11999	4	hypothetical protein		Unknown
ECs0988	-0.361394	-0.339726	-0.306931	0.608059	4	hypothetical protein		Unknown
ECs1466	-0.433225	-0.353925	-0.13163	0.557573	4	hypothetical protein		Unknown
ECs1654	-0.393218	-0.324327	-0.262442	0.594179	4	hypothetical protein		Unknown
ECs1829					4	hypothetical protein		Unknown
ECs2535	-0.39912	-0.187864	-0.395013	0.592273	4	hypothetical protein		Unknown
ECs2630	-0.364757	-0.333117	-0.264777	0.588773	4	hypothetical protein		Unknown
ECs2653	-0.567797	-0.22888	-0.460718	0.683574	4	hypothetical protein		Unknown
ECs3379	-0.348803	-0.269667	-0.334284	0.586522	4	hypothetical protein		Unknown
ECs3669	-0.544365	-0.450515	-0.256465	0.682646	4	hypothetical protein		Unknown
ECs4782	-0.382093	-0.292373	-0.309665	0.597564	4	hypothetical protein		Unknown
ECs4839	-0.39328	-0.259205	-0.171721	0.523624	4	hypothetical protein		Unknown
ECs5486	-0.578999	-0.687999	-0.145312	0.711907	4	#N/A		Unknown
ECs5362	-0.411529	-0.290444	-0.345177	0.620974	4	#N/A		Unknown
ECs5701	-0.308358	-0.286847	-0.207239	0.521345	4	#N/A		Unknown
ECs5774	-1.01822	-1.95222	-2.41475	1.21678	4	#N/A		Unknown
ECs5463	-0.460396	-0.441636	-0.56869	0.760764	4	#N/A		Unknown
ECs5744	-0.293518	-0.469833	-0.525293	0.70635	4	#N/A		Unknown
ECs5729	-0.831435	-0.334767	-0.603807	0.818714	4	#N/A		Unknown
ECs0473	0.210233	0.125868	0.139773	-0.698353	5	putative NAD(P)H-dependent xylose reductase	xylose	Carbohydrate metabolism
ECs4448	0.449393	0.106021	0.074915	-1.24696	5	D-xylose isomerase	xylose	Carbohydrate metabolism		Fructose and mannose metabolism
ECs4447	0.537118	0.135989	-0.124179	-1.1347	5	xylulokinase	xylose	Carbohydrate metabolism		Pentose and glucuronate interconversions
ECs5014	0.43979	0.16111	0.0654879	-1.39083	5	xylose-proton symport	xylose	Transport
ECs4451					5	putative membrane component of xylose transport system	xylose	Transport	ABC transporter	ABC transporters
ECs4694	0.0679613	-0.440806	0.344584	-0.142123	5	ribokinase	pentose	Carbohydrate metabolism		Pentose phosphate pathway
ECs2128	0.0289729	-0.623177	0.229282	0.156813	5	altronate oxidoreductase	pentose	Carbohydrate metabolism		Pentose and glucuronate interconversions
ECs3974	-0.0778609	-0.538987	0.211691	0.21615	5	uronate isomerase	pentose	Carbohydrate metabolism		Pentose and glucuronate interconversions
ECs3061	0.552533	0.148011	-0.103306	-1.33118	5	fructose-specific PTS system IIA component	fructose	Carbohydrate metabolism	PTS system	Fructose and mannose metabolism
ECs1158	0.415099	0.128413	0.0344021	-1.03609	5	periplasmic glucose-1-phosphatase	glucose; glycolysis	Carbohydrate metabolism		Glycolysis / Gluconeogenesis
ECs3041	0.223795	-0.728805	0.346849	-0.152448	5	ATP-binding component of methyl-galactoside transport system	galactoside	Transport	ABC transporter	ABC transporters
ECs4691	-0.169943	-0.525498	0.270293	0.208299	5	ATP-binding component of D-ribose high-affinity transport system	D-ribose	Transport	ABC transporter	ABC transporters
ECs4011	0.0799665	-0.842386	0.320943	0.0964995	5	N-acetylgalactosamine-specific PTS system enzyme IIB component	galactose; PTS system	Carbohydrate metabolism	PTS system	Galactose metabolism
ECs4013	0.0085217	-0.692108	0.368947	0.0303581	5	N-acetylgalactosamine-specific PTS system enzyme IID component	galactose; PTS system	Carbohydrate metabolism	PTS system	Galactose metabolism
ECs3042	0.0892081	-0.459517	0.433132	-0.322928	5	galactose-binding transport protein	galactose; chemotaxis	Stress response		Bacterial chemotaxis
ECs3043	-0.166745	-0.692987	0.50356	-0.0343785	5	mgl repressor	galactose operon inducer	Transcription and RNA processing
ECs5101	0.523842	0.319393	-0.078693	-2.65166	5	alpha-galactosidase	galactose	Carbohydrate metabolism		Galactose metabolism
ECs3698	0.327582	-0.271879	0.337889	-0.759828	5	low-affinity L-arabinose transport system proton symport protein	L-arabinose	Transport
ECs4603	-0.264	-1.01416	0.776629	-0.444225	5	hexose phosphate transport protein	hexose	Pathogenicity	Two-component system	Two-component system
ECs3181	0.33551	-0.0565523	0.170737	-0.698965	5	phosphotransacetylase	carbon metabolism	Other category		Carbon metabolism
ECs5133	0.340353	0.0822462	0.235721	-1.31295	5	fumarate reductase FrdC	two-component; fumarate reductase	Stress response	Two-component system	Two-component system
ECs5134	0.41034	0.0661097	0.175418	-1.31386	5	iron-sulfur protein subunit of fumarate reductase FrdB	two-component; fumarate reductase	Stress response	Two-component system	Two-component system
ECs5135	0.313407	0.0973222	0.144432	-0.915294	5	flavoprotein subunit of fumarate reductase FrdA	two-component; fumarate reductase	Stress response	Two-component system	Two-component system
ECs0654	0.357378	0.174608	0.0277953	-0.950856	5	citrate lyase alpha chain	two-component	Stress response	Two-component system	Two-component system
ECs0694	0.270604	0.0338514	0.201031	-0.795355	5	putative periplasmic binding transport protein	two-component	Stress response	Two-component system	Two-component system
ECs2071	0.22297	0.0123559	0.198944	-0.631176	5	cryptic nitrate reductase 2 alpha subunit	two-component	Pathogenicity	Two-component system	Two-component system
ECs2046	0.200903	0.0746426	0.28162	-0.956442	5	putative transport system permease protein	quorum sensing	Pathogenicity	Quorum sensing	Quorum sensing
ECs2121	0.288635	0.0822368	0.27771	-1.27878	5	putative transport system permease protein	quorum sensing	Pathogenicity	Quorum sensing	Quorum sensing
ECs2122	0.273019	0.127753	0.287859	-1.45571	5	putative transport system permease protein	quorum sensing	Pathogenicity	Quorum sensing	Quorum sensing
ECs2098					5	glutamate decarboxylase isozyme	quorum sensing	Pathogenicity	Quorum sensing	Quorum sensing
ECs2900	0.185343	0.139905	0.207808	-0.852944	5	hypothetical protein	biosynthesis of antibiotics	Stress response		Biosynthesis of antibiotics
ECs5051	0.21711	0.178163	0.288476	-1.42884	5	acetyl-CoA synthetase	biosynthesis of antibiotics	Stress response		Biosynthesis of antibiotics
ECs2429	0.178829	0.249236	0.098816	-0.840065	5	6-phosphofructokinase II	biosynthesis of antibiotics	Stress response		Biosynthesis of antibiotics
ECs2022	0.345421	0.0278622	0.113098	-0.755637	5	glyceraldehyde 3-phosphate dehydrogenase C	biosynthesis of antibiotics	Stress response		Biosynthesis of antibiotics
ECs2488	0.222899	0.0635004	0.187081	-0.705301	5	glyceraldehyde-3-phosphate dehydrogenase A	biosynthesis of antibiotics	Stress response		Biosynthesis of antibiotics
ECs0745	0.168964	0.234453	0.0860319	-0.743157	5	citrate synthase	biosynthesis of antibiotics	Stress response		Biosynthesis of antibiotics
ECs4128					5	acetyl CoA carboxylase biotin carboxylase subunit	biosynthesis of antibiotics	Stress response		Biosynthesis of antibiotics
ECs1812	0.420951	0.0906717	-0.0595534	-0.72583	5	hypothetical protein	pathogenicity	Pathogenicity		Pathogenic Escherichia coli infection
ECs2355	0.330757	0.167664	0.0369416	-0.868884	5	superoxide dismutase precursor (Cu-Zn)	SOS response	Stress response
ECs0890	0.276913	0.280687	0.152511	-1.53674	5	global regulator protein Dps	stress response	Stress response
ECs2754	0.338722	-0.0300331	0.202765	-0.848552	5	prophage maintenance protein	prophage	Other category
ECs5313					5	putative carbon starvation protein	carbon starvation-induced	Stress response
ECs4377	0.20038	0.116232	0.21273	-0.844117	5	outer membrane protein Slp	outer membrane protein	Pathogenicity	outer membrane protein
ECs5102	0.474967	0.299137	-0.0973863	-1.66284	5	melibiose permease II	membrane	Transport
ECs4393	0.336992	0.317358	-0.0431291	-1.19267	5	putative membrane protein	membrane	Other category
ECs4646	0.301608	0.166886	0.225091	-1.44209	5	low affinity tryptophan permease	membrane	Transport
ECs4481					5	L-lactate permease	membrane	Transport
ECs5207	0.223192	-0.295435	0.219108	-0.257342	5	putative transport system permease protein	membrane	Transport
ECs4673					5	membrane-bound ATP synthase epsilon-subunit AtpC	oxidative phosphorylation	Other category		Oxidative phosphorylation
ECs0986	0.188119	0.0889044	0.20741	-0.732934	5	formate acetyltransferase 1	pyruvate	Other category		Pyruvate metabolism
ECs2705	0.318864	0.177243	0.148163	-1.21126	5	hypothetical protein	pyruvate	Other category		Pyruvate metabolism
ECs4483	0.194391	-0.225521	0.200187	-0.253528	5	L-lactate dehydrogenase	pyruvate	Other category		Pyruvate metabolism
ECs2370	0.341834	0.23445	0.0523518	-1.1798	5	cyclopropane fatty acyl phospholipid synthase	fatty acid metabolism	Other category
ECs3227	0.264634	-0.0214562	0.190975	-0.641416	5	long-chain fatty acid transport protein FadL	fatty acid transport	Transport
ECs1704	0.218934	0.0589273	0.219309	-0.770515	5	dihydroxyacetone kinase	glycerolipid	Other category		Glycerolipid metabolism
ECs3875	0.105459	-0.208774	0.215965	-0.177132	5	hydrogenase-2 operon protein HybG	hydrogenase	Nucleotide metabolism and DNA recombination
ECs2452	0.373318	0.213868	0.197024	-2.09475	5	putative aldehyde dehydrogenase	dehydrogenase	Amino acid and protein metabolism		Arginine and proline metabolism
ECs1047					5	methylglyoxal synthase	propanoate	Other category		Propanoate metabolism
ECs4695	-0.170941	-0.460107	0.304583	0.135961	5	regulator for rbs operon	regulator of operon	Transcription and RNA processing
ECs3975	-0.132255	-0.775127	0.291081	0.265058	5	transport protein of hexuronates	hexuronates	Transport
ECs4644	0.312357	0.0257729	0.24453	-1.04269	5	tryptophanase leader peptide	tryptophanase	Pathogenicity
ECs4645	0.394364	0.189067	0.179583	-1.92054	5	tryptophanase	tryptophanase	Amino acid and protein metabolism		Tryptophan metabolism
ECs3024					5	putative oxidoreductase	oxidoreductase	Other category
ECs3896	0.263051	0.248627	0.184029	-1.44803	5	2,5-diketo-D-gluconate reductase	reductase	Other category
ECs5054	0.220927	0.241425	0.0555306	-0.81554	5	formate-dependent nitrite reductase NrfC	reductase	Other category
ECs5111	0.395176	0.0980703	0.0939783	-1.04741	5	lysine tRNA synthetase	tRNA synthetase	Nucleotide metabolism and DNA recombination		Aminoacyl-tRNA biosynthesis
ECs0395	0.470542	0.0569503	0.0715309	-1.16055	5	thiogalactoside acetyltransferase	acetyltransferase	Other category
ECs2126	0.418728	0.0876116	0.0693949	-1.02959	5	putative enzyme	enzyme	Other category
ECs2387	0.405588	0.20701	-0.113142	-0.864318	5	selenocysteine lyase	selenocysteine lyase	Other category		Selenocompound metabolism
ECs4848					5	putative regulator	TF	Transcription and RNA processing
ECs2450	0.345468	0.234995	0.200396	-2.04619	5	hypothetical protein	arginine and proline metabolism	Amino acid and protein metabolism		Arginine and proline metabolism
ECs2451	0.352746	0.231206	0.195096	-2.03152	5	hypothetical protein	arginine and proline metabolism	Amino acid and protein metabolism		Arginine and proline metabolism
ECs2453	0.397174	0.147917	0.201816	-1.8108	5	hypothetical protein	arginine and proline metabolism	Amino acid and protein metabolism		Arginine and proline metabolism
ECs3040	0.0374823	-0.398212	0.406765	-0.253395	5	methyl-galactoside transport system permease protein	ABC transporter	Transport	ABC transporter	ABC transporters
ECs3087	0.0782066	-0.166893	0.283789	-0.299599	5	heme exporter protein C	ABC transporter	Transport	ABC transporter	ABC transporters
ECs3088	0.108311	-0.310782	0.189354	-0.0549284	5	heme exporter protein C	ABC transporter	Transport	ABC transporter	ABC transporters
ECs5018	0.259317	-0.365344	0.64293	-2.24551	5	ATP-binding component of transport system for maltose	ABC transporter	Transport	ABC transporter	ABC transporters
ECs5206	0.241276	-0.33059	0.21082	-0.237906	5	putative ATP-binding component of a transport system	ABC transporter	Transport
ECs4296					5	ATP-binding component of sn-glycerol 3-phosphate transport system	ABC transporter	Transport	ABC transporter	ABC transporters
ECs0317					5	hypothetical protein		Unknown
ECs1159					5	hypothetical protein		Unknown
ECs2320					5	hypothetical protein		Unknown
ECs2386	0.420748	0.161932	-0.135515	-0.745438	5	hypothetical protein		Unknown
ECs2388	0.296272	0.312168	-0.00840365	-1.11753	5	hypothetical protein		Unknown
ECs2431	0.205139	0.0915534	0.208298	-0.782091	5	hypothetical protein		Unknown
ECs2492	0.339871	0.290683	0.10989	-1.75449	5	hypothetical protein		Unknown
ECs3401	0.243598	0.138421	0.154375	-0.850277	5	hypothetical protein		Unknown
ECs3989	0.256814	0.262366	0.0566965	-0.987675	5	hypothetical protein		Unknown
ECs4112					5	hypothetical protein		Unknown
ECs2028	0.243704	-0.250463	0.204146	-0.308945	5	hypothetical protein		Unknown
ECs2774	0.0336949	-0.286786	0.195277	-0.00491008	5	hypothetical protein		Unknown
ECs3749	0.354817	-0.813811	0.22407	-0.100148	5	hypothetical protein		Unknown
ECs5009	-0.0631016	-0.256955	0.260335	-0.0240552	5	hypothetical protein		Unknown
ECs5298	0.312186	-0.26854	0.324301	-0.68492	5	hypothetical protein		Unknown
ECs5311					5	hypothetical protein		Unknown
ECs5312					5	hypothetical protein		Unknown
ECs5045	0.111648	0.370032	-0.543685	-0.131634	6	redox-sensing activator of soxS	SOS response	Stress response
ECs3448	0.0943588	0.477333	-0.321393	-0.540232	6	putative thioredoxin-like protein	SOS response	Stress response
ECs2570					6	Holliday junction helicase subunit A	SOS response	Nucleotide metabolism and DNA recombination		Homologous recombination
ECs3483	-0.0812751	0.239654	-0.249763	0.0288582	6	putative DNA damage-inducible protein	SOS response	Nucleotide metabolism and DNA recombination
ECs5040	0.090941	0.223022	-0.262096	-0.104566	6	excision nuclease subunit A	SOS response	Nucleotide metabolism and DNA recombination		Nucleotide excision repair
ECs4871	0.0598242	0.465746	-0.0125895	-1.00546	6	hydroperoxidase HPI(I)	SOS response	Amino acid and protein metabolism		Phenylalanine metabolism
ECs0645	0.0139645	0.492185	-0.202569	-0.6113	6	alkyl hydroperoxide reductase F52a subunit	SOS response	Other category
ECs5044	-0.26917	0.223473	-0.0274225	-0.00454368	6	regulation of superoxide response regulon	SOS response	Transcription and RNA processing
ECs0253	0.11167	0.395058	-0.0395426	-0.800429	6	damage-inducible protein DinJ	SOS response	Stress response
ECs0929	-0.128316	0.826527	-0.313418	-2.22623	6	glutaredoxin1 redox coenzyme for glutathione-dependent ribonucleotide reductase	SOS response	Nucleotide metabolism and DNA recombination
ECs0128					6	glucose dehydrogenase	biosynthesis of antibiotics	Stress response		Biosynthesis of antibiotics
ECs4869					6	aspartokinase II / homoserine dehydrogenase II	biosynthesis of antibiotics	Stress response		Biosynthesis of antibiotics
ECs4286	0.179395	0.320352	-0.469077	-0.188426	6	gluconokinase 2	biosynthesis of antibiotics	Stress response		Biosynthesis of antibiotics
ECs1849	0.0612724	0.331309	0.0289844	-0.652315	6	aconitate hydrase 1	biosynthesis of antibiotics	Stress response		Biosynthesis of antibiotics
ECs3327	0.140602	0.307068	-0.0284505	-0.630384	6	transketolase 2 isozyme	biosynthesis of antibiotics	Stress response		Biosynthesis of antibiotics
ECs4702	0.0794331	0.30196	-0.159906	-0.321543	6	acetolactate synthase II large subunit	biosynthesis of antibiotics	Stress response		Biosynthesis of antibiotics
ECs5036					6	tyrosine aminotransferase	biosynthesis of antibiotics	Stress response		Biosynthesis of antibiotics
ECs3463	0.0653195	0.758345	-0.803862	-0.977662	6	chorismate mutase-T / prephenate dehydrogenase	biosynthesis of antibiotics	Stress response		Biosynthesis of antibiotics
ECs3464	0.182181	0.703067	-0.759014	-1.05633	6	3-deoxy-D-arabinoheptulosonate-7-phosphate synthase	biosynthesis of antibiotics	Stress response		Biosynthesis of antibiotics
ECs1175					6	recombination protein Bet	prophage	Nucleotide metabolism and DNA recombination
ECs3001	0.0795872	0.230988	-0.0719079	-0.305763	6	recombination protein Bet	prophage	Nucleotide metabolism and DNA recombination
ECs1883	-0.202	0.416538	0.0161437	-0.450698	6	phage shock protein	phage shock protein	Stress response
ECs0744	0.0487308	0.273634	-0.234802	-0.155631	6	putative fimbrial-like protein	fimbrial	Cell motility	flagellar/fimbrial/curli/pili-related
ECs1419	0.0106624	0.369041	-0.367546	-0.148597	6	minor curlin subunit precursor CsgB	biofilm	Pathogenicity	Biofilm formation	Biofilm formation - Escherichia coli
ECs4552	0.104787	0.282247	-0.511637	-0.0147624	6	EscF protein	T3SS	Pathogenicity	T3SS	Bacterial secretion system
ECs4791					6	histidine protein kinase sensor GlnL	two-component	Pathogenicity	Two-component system	Two-component system
ECs4792					6	glutamine synthetase	two-component	Pathogenicity	Two-component system	Two-component system
ECs1176					6	host-nuclease inhibitor protein Gam	pathogenicity	Pathogenicity
ECs3000	0.126613	0.258077	-0.183567	-0.280749	6	putative host-nuclease inhibitor protein Gam	pathogenicity	Pathogenicity
ECs1177					6	Kil protein	pathogenicity	Pathogenicity
ECs4432	0.319695	0.48963	-0.327345	-1.16498	6	putative resistance protein	resistance	Stress response
ECs1772	0.288146	0.615816	-0.692221	-1.02386	6	putative colonization factor	colonization	Other category
ECs1181					6	putative anti-termination protein N	anti-termination	Nucleotide metabolism and DNA recombination
ECs0358	-0.0070023	0.410792	-0.0289578	-0.63452	6	NAD+-dependent betaine aldehyde dehydrogenase	osmoprotectant glycine betaine	Amino acid and protein metabolism		Glycine, serine and threonine metabolism
ECs2515	0.0417458	0.275945	0.0762652	-0.574148	6	putative outer membrane protein	outer membrane protein	Pathogenicity	outer membrane protein
ECs3368					6	putative membrane protein	membrane	Other category
ECs4855	0.266943	0.23556	-0.627917	-0.0688296	6	hypothetical membrane protein	membrane	Other category
ECs4758					6	regulator for metE and metH	methionine	Transcription and RNA processing
ECs1059					6	putative division inhibition protein	cell division inhibition	Cell division
ECs1728	0.284353	0.270725	-0.454165	-0.270109	6	nitrite extrusion protein	nitrite extrusion	Other category		Nitrogen metabolism
ECs2709	-0.059565	0.742791	-0.516499	-0.991321	6	putative reductase	reductase	Other category
ECs2053	0.172035	0.250483	0.079974	-0.779369	6	putative oxidoreductase	oxidoreductase	Other category
ECs4372	0.174387	0.229838	-0.118059	-0.382487	6	glutathione oxidoreductase	glutathione	Other category		Glutathione metabolism
ECs2604	0.114348	0.256732	0.0398465	-0.587644	6	trehalose-6-phosphate synthase	trehalose	Carbohydrate metabolism		Starch and sucrose metabolism
ECs2693	0.17772	0.288403	-0.0248853	-0.665844	6	hypothetical protein	fructose and mannose	Carbohydrate metabolism		Fructose and mannose metabolism
ECs2548					6	phosphoprotein phosphatase 1	phosphatase	Other category
ECs0478	0.16998	0.258622	-0.0759713	-0.49239	6	4-methyl-5(beta-hydroxyethyl)-thiazole monophosphate synthesis	monophosphate	Other category
ECs0263	-0.00417393	0.280884	-0.102258	-0.247237	6	probable peptide chain release factor	peptide chain release	Amino acid and protein metabolism
ECs0538	0.199892	0.312093	0.0801082	-1.05995	6	putative glutaminase	arginine	Amino acid and protein metabolism		Arginine biosynthesis
ECs0552					6	putative protease	protease	Amino acid and protein metabolism
ECs0357	0.0254689	0.405824	-0.149882	-0.476151	6	choline dehydrogenase	choline	Amino acid and protein metabolism		Glycine, serine and threonine metabolism
ECs3779					6	proline aminopeptidase P II	proline	Amino acid and protein metabolism
ECs0619	0.0792163	0.286584	0.0924499	-0.704237	6	hypothetical protein	glutathione	Amino acid and protein metabolism		Glutathione metabolism
ECs0422					6	taurine dioxygenase	sulfur	Other category		Sulfur metabolism
ECs1018					6	alkanesulfonate monooxygenase	sulfur	Other category		Sulfur metabolism
ECs0700	0.145344	0.27161	-0.0187837	-0.571301	6	oxygenase	terpenoid-quinone biosynthesis	Other category		Ubiquinone and other terpenoid-quinone biosynthesis
ECs3778					6	2-octaprenyl-6-methoxyphenol 4-monoxygenase	terpenoid-quinone biosynthesis	Other category		Ubiquinone and other terpenoid-quinone biosynthesis
ECs1174					6	exonuclease	exonuclease	Nucleotide metabolism and DNA recombination
ECs4153	-0.00929824	0.285526	0.0102894	-0.401932	6	10-formyltetrahydrofolate:L-methionyl-tRNA(fMet) N-formyltransferase	Aminoacyl-tRNA biosynthesis	Nucleotide metabolism and DNA recombination		Aminoacyl-tRNA biosynthesis
ECs0528	-0.142274	0.408767	-0.21886	-0.19688	6	ferrochelatase	porphyrin and chlorophyll metabolism	Other category		Porphyrin and chlorophyll metabolism
ECs0882	0.138324	0.261263	-0.151253	-0.341447	6	putative enzyme	enzyme	Other category
ECs2359	0.134676	0.397928	-0.13412	-0.673184	6	N-ethylmaleimide reductase	nitrotoluene degradation	Other category		Nitrotoluene degradation
ECs2405	0.177792	0.291398	0.049934	-0.839486	6	putative flavoprotein	flavoprotein	Other category
ECs3445	0.136798	0.423192	0.00095393	-1.07872	6	putative formate acetyltransferase	formate acetyltransferase	Other category
ECs3984	0.0959441	0.263866	0.0803961	-0.652052	6	putative transferase	transferase	Other category
ECs2361					6	RNase T	Rnase	Transcription and RNA processing
ECs4048	-0.0985726	0.282122	-0.126583	-0.123243	6	ribosome-binding factor A	ribosome-binding	Transcription and RNA processing
ECs2362	0.224831	0.22104	-0.348658	-0.192955	6	probable ATP-dependent helicase Lhr	helicase	Nucleotide metabolism and DNA recombination
ECs3604	0.0190903	0.243882	-0.0155688	-0.323924	6	adenosine 5'-phosphosulfate kinase	purine	Nucleotide metabolism and DNA recombination		Purine metabolism
ECs5215	-0.00955037	0.225665	0.0211859	-0.308137	6	anaerobic ribonucleoside-triphosphate reductase	purine	Nucleotide metabolism and DNA recombination		Purine metabolism
ECs2708	0.48144	0.552862	-0.669471	-1.61767	6	hypothetical protein	purine	Nucleotide metabolism and DNA recombination		Purine metabolism
ECs4598					6	putative DNA-binding protein	DNA-binding protein	Nucleotide metabolism and DNA recombination
ECs2817	0.178349	0.234659	-0.0298298	-0.531764	6	putative transcriptional regulator LYSR-type	TF	Transcription and RNA processing
ECs2988	0.074502	0.305619	-0.330922	-0.147802	6	regulatory protein CII	TF	Transcription and RNA processing
ECs3534	0.114054	0.386172	-0.489001	-0.201847	6	putative transcriptional regulator	TF	Transcription and RNA processing
ECs0070	0.226246	0.399449	-0.596088	-0.302013	6	putative ATP-binding component of a transport system	ABC transporter	Transport	ABC transporter	ABC transporters
ECs0415	-0.030759	0.30905	-0.194004	-0.164149	6	putative periplasmic-iron-binding protein	ABC transporter	Transport	ABC transporter	ABC transporters
ECs0421	0.125479	0.316407	-0.0563643	-0.574378	6	taurine transport system permease protein	ABC transporter	Transport	ABC transporter	ABC transporters
ECs2655	0.0844175	0.236706	-0.0395168	-0.366606	6	putative ATP-binding component of a transport system	ABC transporter	Transport	ABC transporter	ABC transporters
ECs3295	-0.316996	0.257173	-0.0697208	0.0266425	6	sulfate transport system permease T protein	ABC transporter	Transport	ABC transporter	ABC transporters
ECs2389	0.24073	0.33593	0.000748264	-1.0447	6	putative ATP-binding component of a transport system	ABC transporter	Transport
ECs0071	0.140313	0.620344	-1.19026	-0.327137	6	putative transport system permease protein	ABC transporter	Transport	ABC transporter	ABC transporters
ECs3541					6	high-affinity glycine betaine / proline transport system protein	ABC transporter	Transport	ABC transporter	ABC transporters
ECs0927					6	putative transport protein	transport	Transport
ECs3271	0.0293421	0.376887	-0.0191939	-0.622412	6	high affinity manganese transport protein	transport	Transport
ECs3034	-0.0714527	0.254427	-0.00757767	-0.244858	6	putative seritonin transporter	transport	Transport
ECs5300					6	putative transport protein	transport	Transport
ECs0006	-0.176397	0.432691	-0.177911	-0.251966	6	hypothetical protein		Unknown
ECs0069	0.130196	0.243654	-0.115091	-0.343443	6	hypothetical protein		Unknown
ECs0497					6	hypothetical protein		Unknown
ECs0713	-0.12059	0.221984	-0.090841	-0.0552365	6	hypothetical protein		Unknown
ECs0871	0.113838	0.253753	-0.0345326	-0.451593	6	hypothetical protein		Unknown
ECs1000					6	hypothetical protein		Unknown
ECs1049					6	hypothetical protein		Unknown
ECs1163					6	hypothetical protein		Unknown
ECs1711	0.17481	0.241425	-0.0640501	-0.483781	6	hypothetical protein		Unknown
ECs2212	0.014971	0.389641	-0.0475679	-0.580313	6	hypothetical protein		Unknown
ECs2282	-0.10679	0.234344	0.0445496	-0.243998	6	hypothetical protein		Unknown
ECs2358	0.19558	0.30853	-0.0338597	-0.742311	6	hypothetical protein		Unknown
ECs2385	0.19354	0.361332	0.0526817	-1.15498	6	hypothetical protein		Unknown
ECs2390	0.199842	0.376668	0.0414273	-1.21046	6	hypothetical protein		Unknown
ECs2391	0.190245	0.398084	0.00867412	-1.16513	6	hypothetical protein		Unknown
ECs2432					6	hypothetical protein		Unknown
ECs2671	0.195384	0.227439	-0.165012	-0.351235	6	hypothetical protein		Unknown
ECs2909	0.258231	0.247049	-0.211038	-0.437291	6	hypothetical protein		Unknown
ECs3179	0.0617794	0.23233	-0.0514784	-0.311003	6	hypothetical protein		Unknown
ECs3528					6	hypothetical protein		Unknown
ECs3834	0.0149136	0.245094	0.001539	-0.345004	6	hypothetical protein		Unknown
ECs4033	0.123185	0.335735	0.0177902	-0.76775	6	hypothetical protein		Unknown
ECs4111	-0.105078	0.324717	-0.0303952	-0.300232	6	hypothetical protein		Unknown
ECs4294	-0.0751552	0.37364	-0.0735929	-0.373085	6	hypothetical protein		Unknown
ECs5285	0.0938995	0.239195	0.0778806	-0.584451	6	hypothetical protein		Unknown
ECs0259	0.0806937	0.268269	-0.24988	-0.169967	6	hypothetical protein		Unknown
ECs0260	0.0937935	0.31959	-0.258698	-0.262599	6	hypothetical protein		Unknown
ECs1172					6	hypothetical protein		Unknown
ECs1616	0.146069	0.253695	-0.356127	-0.132545	6	hypothetical protein		Unknown
ECs1673	0.0453469	0.23029	-0.234318	-0.0896637	6	hypothetical protein		Unknown
ECs1940					6	hypothetical protein		Unknown
ECs1956					6	hypothetical protein		Unknown
ECs2710	0.0696959	0.43754	-0.626567	-0.14422	6	hypothetical protein		Unknown
ECs3449	0.0395109	0.350222	-0.604384	0.011494	6	hypothetical protein		Unknown
ECs3535	0.0624408	0.32486	-0.379552	-0.124147	6	hypothetical protein		Unknown
ECs3706	0.197225	0.256901	-0.495018	-0.0951679	6	hypothetical protein		Unknown
ECs4051					6	hypothetical protein		Unknown
ECs4115					6	hypothetical protein		Unknown
ECs4140	-0.340424	0.218479	-0.5909	0.392373	6	hypothetical protein		Unknown
ECs5030	-0.00677444	0.233898	-0.716543	0.238595	6	hypothetical protein		Unknown
ECs5042	-0.182534	0.360295	-0.379021	0.0447314	6	hypothetical protein		Unknown
ECs5193	0.288592	0.239496	-0.380034	-0.290315	6	hypothetical protein		Unknown
ECs1939	0.0578103	0.515226	-0.376603	-0.515967	6	hypothetical protein		Unknown
ECs5726	0.258327	0.559444	-1.03009	-0.440689	6	#N/A		Unknown
ECs5773	0.123917	0.280721	-0.876303	0.14482	6	#N/A		Unknown
ECs5735	-0.0724786	0.341954	-0.400031	-0.00278619	6	#N/A		Unknown
ECs5763	-0.464255	0.315831	-0.0945556	0.0624145	6	#N/A		Unknown
ECs5775	-0.0480871	0.2591	0.0336499	-0.33734	6	#N/A		Unknown
ECs0837	0.705135	-0.657367	-0.976792	0.164439	7	putative tail length tape measure protein precursor	prophage	Other category
ECs0838	0.758975	-0.569505	-0.95407	0.0193965	7	putative minor tail protein	prophage	Other category
ECs0841	0.782646	-0.83087	-1.65107	0.262869	7	putative tail assembly protein	prophage	Other category
ECs0844	0.793427	-0.709267	-2.12731	0.26042	7	putative tail fiber protein	prophage	Other category
ECs1115	0.750722	-0.791144	-0.994738	0.151364	7	putative minor tail protein	prophage	Other category
ECs1530	0.876502	-0.82082	-1.95118	0.139388	7	putative holin	prophage	Other category
ECs1559					7	putative tail assembly protein	prophage	Other category
ECs1622	0.702825	-0.773418	-1.21063	0.277762	7	putative endolysin	prophage	Other category
ECs1646	0.745144	-0.720736	-1.08895	0.161694	7	tail assembly protein	prophage	Other category
ECs1647	0.762843	-0.82082	-1.03488	0.155137	7	tail assembly protein	prophage	Other category
ECs2953	0.711256	-0.552885	-1.13467	0.154438	7	putative minor tail protein	prophage	Other category
ECs2954	0.75248	-0.633357	-1.15061	0.129026	7	putative minor tail protein	prophage	Other category
ECs2734	0.814544	-0.628346	-1.51754	0.10438	7	putative head completion protein	prophage	Other category
ECs1773					7	putative prophage maintenance protein	prophage	Other category
ECs1590	0.681802	-0.245082	-0.477496	-0.345264	7	putative major head protein	prophage	Other category
ECs1977	0.731388	-0.111412	-0.619632	-0.529847	7	putative head-tail adaptor	prophage	Other category
ECs1980	0.698821	-0.116112	-0.401636	-0.655067	7	major tail protein	prophage	Other category
ECs1983	0.727575	-0.147673	-0.649421	-0.440228	7	putative tail length tape measure protein	prophage	Other category
ECs1984	0.676608	-0.102355	-0.455682	-0.538011	7	putative minor tail protein	prophage	Other category
ECs1985	0.667533	-0.0302986	-0.525879	-0.549439	7	putative minor tail protein	prophage	Other category
ECs1986	0.650857	-0.0494205	-0.45488	-0.543841	7	putative tail assembly protein	prophage	Other category
ECs1987	0.621193	0.0451701	-0.428406	-0.65285	7	putative tail assembly protein	prophage	Other category
ECs1992	0.650982	-0.166203	-0.558959	-0.288858	7	putative tail fiber protein	prophage	Other category
ECs1974	0.724898	-0.171158	-0.577595	-0.463713	7	putative portal protein	prophage	Nucleotide metabolism and DNA recombination
ECs1769	0.610651	-0.501297	-1.22619	0.296177	7	putative phage replication protein	prophage	Nucleotide metabolism and DNA recombination
ECs0825	0.687942	-0.559249	-1.03283	0.164117	7	putative terminase large subunit	prophage	Nucleotide metabolism and DNA recombination
ECs2188	0.617533	-0.565415	-1.15677	0.29921	7	putative holin protein	prophage	Other category
ECs0840	0.614423	-0.604597	-1.10634	0.306821	7	putative tail assembly protein	prophage	Other category
ECs0835	0.68964	-0.501297	-1.39324	0.224718	7	putative minor tail protein	prophage	Other category
ECs0280	0.692885	-0.625075	-1.01349	0.180982	7	putative tail fiber protein	prophage	Other category
ECs0812	0.690084	-0.587205	-1.08895	0.190682	7	NinG protein	prophage	Other category
ECs3497	0.691384	-0.669135	-1.32949	0.281503	7	holin protein	prophage	Other category
ECs1116	0.697704	-0.694068	-1.16764	0.245521	7	putative minor tail protein	prophage	Other category
ECs1782	0.675832	-0.656517	-1.21435	0.27292	7	putative holin protein	prophage	Other category
ECs1100	0.582355	-1.01236	-1.33178	0.508825	7	putative holin protein	prophage	Other category
ECs0819	0.593425	-0.569505	-1.20738	0.341913	7	endolysin	prophage	Other category
ECs2261	0.647709	-0.604597	-1.32949	0.314484	7	putative holin protein	prophage	Other category
ECs1621	0.654854	-0.634569	-1.55362	0.355986	7	putative holin protein	prophage	Other category
ECs1541	0.63961	-0.292752	-0.841752	0.013811	7	putative terminase small subunit	prophage	Nucleotide metabolism and DNA recombination
ECs1574	0.650201	-0.289585	-0.691076	-0.0822836	7	putative integrase	prophage	Nucleotide metabolism and DNA recombination
ECs1592	0.64506	-0.233033	-0.788025	-0.0680069	7	putative head portal protein	prophage	Nucleotide metabolism and DNA recombination
ECs1597	0.646504	-0.37569	-0.812898	0.0468818	7	putative terminase small subunit	prophage	Nucleotide metabolism and DNA recombination
ECs1791					7	putative terminase small subunit	prophage	Nucleotide metabolism and DNA recombination
ECs1970	0.63961	-0.292752	-0.841752	0.013811	7	putative terminase small subunit	prophage	Nucleotide metabolism and DNA recombination
ECs2252	0.63961	-0.292752	-0.841752	0.013811	7	putative terminase small subunit	prophage	Nucleotide metabolism and DNA recombination
ECs2762	0.639426	-0.360696	-0.8086	0.0469632	7	putative phage replication protein	prophage	Nucleotide metabolism and DNA recombination
ECs0283	0.732071	-0.446126	-0.999167	0.0150906	7	putative tail fiber protein	prophage	Other category
ECs0836	0.700893	-0.55547	-0.968581	0.120534	7	putative minor tail protein	prophage	Other category
ECs1113	0.627298	-0.321326	-1.12626	0.153375	7	putative minor tail protein	prophage	Other category
ECs1213	0.666383	-0.348663	-0.769872	-0.0263232	7	putative endolysin	prophage	Other category
ECs1558					7	putative tail assembly protein	prophage	Other category
ECs1591	0.689818	-0.401369	-0.838577	-0.000776134	7	putative prohead protease	prophage	Other category
ECs1593	0.678047	-0.415355	-0.828466	0.0250835	7	putative head-tail adaptor	prophage	Other category
ECs1613	0.69479	-0.602953	-0.788848	0.0853211	7	Ren protein	prophage	Other category
ECs1638	0.757241	-0.552885	-0.798202	-0.0546537	7	minor tail protein	prophage	Other category
ECs1639	0.642215	-0.535983	-0.647769	0.072249	7	minor tail protein	prophage	Other category
ECs1644	0.6828	-0.582409	-0.709463	0.0593456	7	minor tail protein	prophage	Other category
ECs1962	0.830922	-0.490517	-0.732825	-0.316238	7	putative holin protein	prophage	Other category
ECs2164	0.711395	-0.306461	-0.89782	-0.0850203	7	putative minor tail protein	prophage	Other category
ECs2165	0.656895	-0.431355	-0.829033	0.0713668	7	putative minor tail protein	prophage	Other category
ECs2727	0.613466	-0.302368	-1.1073	0.156332	7	putative minor tail protein	prophage	Other category
ECs2968	0.669261	-0.345786	-0.791092	-0.0234455	7	putative endolysin	prophage	Other category
ECs2980	0.570683	-0.185243	-1.13328	0.146357	7	hypothetical protein NinE	prophage	Other category
ECs2985	0.655047	-0.430061	-1.01037	0.140431	7	Ren protein	prophage	Other category
ECs4550	0.775422	-0.595148	-1.41535	0.137578	7	EspF protein	T3SS	Pathogenicity	T3SS	Pathogenic Escherichia coli infection
ECs3722	0.666305	-0.539292	-1.18414	0.229026	7	type III secretion protein EpaR2	T3SS	Pathogenicity	T3SS
ECs0607	0.63768	-0.763661	-1.67087	0.435439	7	putative Vgr protein	secretion	Pathogenicity		Bacterial secretion system
ECs4259	0.363429	-0.0773663	0.152255	-0.688375	7	maltodextrin phosphorylase	biofilm	Pathogenicity	Biofilm formation	Biofilm formation - Escherichia coli
ECs2119	0.626556	-0.259716	-0.0571263	-0.725559	7	putative SORC-type transcriptional regulator	biofilm	Pathogenicity	Biofilm formation	Biofilm formation - Escherichia coli
ECs0350	0.671871	-0.506327	-1.30533	0.234134	7	putative adhesin	adhesin	Pathogenicity	adhesin
ECs2107	0.571788	-0.77826	-1.63668	0.504721	7	putative adhesin	adhesin	Pathogenicity	adhesin
ECs0595	0.81691	-0.82082	-1.25803	0.123388	7	SfmH protein	adhesion	Pathogenicity
ECs0596	0.70115	-0.900863	-1.22029	0.32293	7	putative fimbrial-like protein	fimbrial	Cell motility	flagellar/fimbrial/curli/pili-related
ECs1027	0.751914	-0.948159	-1.16222	0.250941	7	putative fimbrial-like protein	fimbrial	Cell motility	flagellar/fimbrial/curli/pili-related
ECs5274	0.890073	-0.698024	-1.64606	0.0100528	7	fimbrial protein	fimbrial	Cell motility	flagellar/fimbrial/curli/pili-related
ECs5277	0.735444	-0.899512	-1.10311	0.245521	7	fimbrial morphology	fimbrial	Cell motility	flagellar/fimbrial/curli/pili-related
ECs5275	0.719168	-0.900863	-2.03122	0.416021	7	periplasmic chaperone required for type 1 fimbriae	fimbrial	Pathogenicity	flagellar/fimbrial/curli/pili-related
ECs5278	0.696468	-0.542354	-1.14946	0.176692	7	fimbrial morphology	fimbrial	Cell motility	flagellar/fimbrial/curli/pili-related
ECs5276	0.696152	-0.735827	-1.2784	0.28892	7	export and assembly outer membrane protein of type 1 fimbriae	fimbrial	Cell motility	flagellar/fimbrial/curli/pili-related
ECs0257	0.750104	-0.595148	-1.07888	0.0931266	7	flagellar biosynthesis	flagellar	Cell motility	flagellar/fimbrial/curli/pili-related
ECs2590	0.5397	-0.718541	-1.22029	0.455241	7	flagellar biosynthesis protein FlhB	flagellar	Cell motility	flagellar/fimbrial/curli/pili-related	Flagellar assembly
ECs2044	0.389979	-0.0819505	0.225037	-0.965649	7	putative transport protein	quorum sensing	Pathogenicity	Quorum sensing	Quorum sensing
ECs2047	0.511902	-0.0318879	0.103149	-1.18648	7	putative transport system permease protein	quorum sensing	Pathogenicity	Quorum sensing	Quorum sensing
ECs2118	0.510185	-0.0676609	0.151551	-1.25415	7	putative kinase	quorum sensing	Pathogenicity	Quorum sensing	Quorum sensing
ECs2120	0.562865	-0.0849776	0.139514	-1.45763	7	putative ATP-binding component of a transport system	quorum sensing	Pathogenicity	Quorum sensing	Quorum sensing
ECs2123	0.619335	-0.0567807	0.111493	-1.92727	7	putative LACI-type transcriptional regulator	quorum sensing	Pathogenicity	Quorum sensing	Quorum sensing
ECs2124	0.643186	-0.0281165	0.0750724	-2.1365	7	hypothetical protein	quorum sensing	Pathogenicity	Quorum sensing	Quorum sensing
ECs2125	0.534206	0.0518546	0.173657	-2.26995	7	hypothetical protein	quorum sensing	Pathogenicity	Quorum sensing	Quorum sensing
ECs3414	0.6828	-0.657916	-0.883816	0.167559	7	putative LACI-type transcriptional regulator	quorum sensing	Pathogenicity	Quorum sensing
ECs0726	0.727752	-0.738128	-1.32949	0.255528	7	high-affinity potassium-transporting ATPase A chain	two-component	Pathogenicity	Two-component system	Two-component system
ECs0653	0.488296	-0.122467	0.248134	-1.39897	7	hypothetical protein	two-component	Stress response	Two-component system	Two-component system
ECs1130	0.611863	-0.189143	0.217369	-1.92032	7	probable Ni/Fe-hydrogenase 1 b-type cytochrome subunit	two-component	Stress response	Two-component system	Two-component system
ECs1135	0.593062	-0.109671	0.0867864	-1.32322	7	probable third cytochrome oxidase subunit II	two-component	Stress response	Two-component system	Two-component system
ECs1134	0.603415	-0.0689074	0.0968567	-1.60681	7	probable third cytochrome oxidase subunit I	two-component	Pathogenicity	Two-component system	Two-component system
ECs0613	0.629312	-0.607727	-1.09146	0.285342	7	putative inner membrane component for iron transport	two-component	Pathogenicity	Two-component system	Two-component system
ECs0727	0.669753	-0.82082	-1.76885	0.42707	7	KdpF protein of high-affinity potassium transport system	two-component	Pathogenicity	Two-component system	Two-component system
ECs3850	0.550282	-0.492741	-1.32683	0.383585	7	putative virulence-related membrane protein	two-component	Pathogenicity	Two-component system	Two-component system
ECs4271	0.64506	-0.449256	-1.20924	0.221626	7	putative ATP binding protein of ABC transporter	two-component	Pathogenicity	Two-component system	Two-component system
ECs0655	0.762843	-0.290192	-0.852563	-0.237906	7	citrate lyase beta chain	two-component	Pathogenicity	Two-component system	Two-component system
ECs0848	0.610803	-0.407462	-1.1514	0.232494	7	hypothetical protein	pathogenicity	Pathogenicity		Pathogenic Escherichia coli infection
ECs1083	0.64506	-0.472513	-1.39156	0.27292	7	putative crossover junction endodeoxyribonuclease	SOS response	Nucleotide metabolism and DNA recombination
ECs2268	0.549269	-0.78308	-0.814823	0.364727	7	putative crossover junction endodeoxyribonuclease	SOS response	Nucleotide metabolism and DNA recombination
ECs1523	0.648651	-0.562337	-1.51037	0.328878	7	putative crossover junction endodeoxyribonuclease	SOS response	Nucleotide metabolism and DNA recombination
ECs2303	0.578053	-0.98947	-0.815605	0.391233	7	acid shock protein	acid shock protein	Stress response
ECs1864	0.686303	-0.538415	-0.906631	0.113492	7	putative multidrug-efflux transport protein	beta-Lactam resistance	Stress response		beta-Lactam resistance
ECs0119	0.597035	-0.10072	-0.192544	-0.644962	7	pyruvate dehydrogenase dihydrolipoyltransacetylase component	biosynthesis of antibiotics	Stress response		Biosynthesis of antibiotics
ECs0757	0.642215	-0.798347	-0.935451	0.295393	7	putative fumarate hydratase	biosynthesis of antibiotics	Stress response		Biosynthesis of antibiotics
ECs4802	0.665679	-0.740777	-0.852563	0.215761	7	putative aldose-1-epimerase	biosynthesis of antibiotics	Stress response		Biosynthesis of antibiotics
ECs3315	0.663752	-0.802128	-1.23934	0.345679	7	ethanolamine utilization protein EutG	biosynthesis of antibiotics	Stress response		Biosynthesis of antibiotics
ECs0843	0.789511	-1.1359	-1.16764	0.245521	7	putative outer membrane protein precursor	outer membrane protein	Pathogenicity	outer membrane protein
ECs2915	0.727252	-0.696068	-1.05323	0.169887	7	putative outer membrane protein	outer membrane protein	Pathogenicity	outer membrane protein
ECs0594	0.632223	-0.643613	-1.16086	0.312925	7	putative outer membrane protein	outer membrane protein	Pathogenicity	outer membrane protein
ECs1898	0.627042	-0.281823	-1.09373	0.118769	7	outer membrane protein	outer membrane protein	Pathogenicity	outer membrane protein
ECs3635	0.877619	-1.05586	-1.86079	0.202961	7	hypothetical membrane protein	membrane	Other category
ECs0798	0.748658	-0.806834	-1.12626	0.199895	7	putative membrane pump protein	membrane	Transport
ECs0396	0.442091	0.00944008	0.116283	-1.0414	7	galactoside permease	membrane	Transport
ECs4394	0.497883	0.0378617	-0.0469508	-0.877699	7	putative transport system permease protein	membrane	Transport
ECs3345	0.629312	-0.520715	-1.09146	0.247602	7	hydrogenase 4 membrane subunit	membrane	Other category
ECs4748	0.54407	-0.544782	-1.64982	0.459612	7	hypothetical membrane protein	membrane	Other category
ECs4137	0.587902	-0.453095	-1.10388	0.27292	7	transmembrane protein affects septum formation and cell membrane permeability	membrane	Transport
ECs3053	0.633309	-0.588374	-1.13094	0.282222	7	putative transport system permease protein	membrane	Transport
ECs4799	0.636963	-0.517137	-1.1085	0.24013	7	putative permease	membrane	Transport
ECs2956	0.695402	-0.255012	-0.779232	-0.154524	7	hypothetical membrane protein	membrane	Other category
ECs3578	0.690522	-0.305354	-0.470629	-0.310227	7	membrane-spanning protein of hydrogenase 3	membrane	Other category
ECs2011	0.671036	-0.18174	-0.94919	-0.0875217	7	putative phosphatidate cytidiltransferase	glycerophospholipid	Other category		Glycerophospholipid metabolism
ECs2739	0.802064			0.637563	7	putative endopeptidase	endopeptidase	Amino acid and protein metabolism
ECs1093	0.585162	-0.438885	-1.72339	0.382921	7	putative endopeptidase	endopeptidase	Amino acid and protein metabolism
ECs1286	0.63501	-0.743859	-0.893385	0.27292	7	putative (3R)-hydroxymyristol-(acyl carrier protein) dehydratase	fatty acid metabolism	Transport
ECs1285	0.799211	-0.715459	-0.970346	0.0216053	7	putative 3-oxoacyl-(acyl carrier protein) reductase	fatty acid metabolism	Stress response
ECs4693	0.611446	-0.697413	-0.158915	-0.132608	7	D-ribose periplasmic binding protein	D-ribose; chemotaxis	Stress response		Bacterial chemotaxis
ECs5017	0.40957	-0.053177	0.400759	-2.526	7	periplasmic maltose-binding protein	maltose; chemotaxis	Stress response		Bacterial chemotaxis
ECs5019					7	maltose high-affinity receptor LamB	maltose	Pathogenicity
ECs4830	0.762843	-0.892279	-0.924022	0.144302	7	L-rhamnose isomerase	fructose	Carbohydrate metabolism		Fructose and mannose metabolism
ECs3060	0.545419	0.0195776	-0.0225618	-1.08869	7	fructose-1-phosphate kinase	fructose	Carbohydrate metabolism		Fructose and mannose metabolism
ECs3243					7	sucrose-6 phosphate hydrolase	fructose	Carbohydrate metabolism		Starch and sucrose metabolism
ECs2482	0.599359	-0.332039	0.126933	-0.947582	7	putative aldolase	fructose	Stress response
ECs3242	0.782468	-0.287431	-0.0478814	-1.58044	7	putative fructokinase	fructose	Carbohydrate metabolism		Starch and sucrose metabolism
ECs4831	0.664403	-0.585254	-1.20478	0.257171	7	rhamnulokinase	fructose	Carbohydrate metabolism		Fructose and mannose metabolism
ECs4826	0.798561	-0.92618	-1.05323	0.136788	7	fructose-specific PTS system enzyme IIA component	fructose	Carbohydrate metabolism	PTS system
ECs4882	0.738746	-0.857188	-1.14025	0.236552	7	PTS system fructose-like IIB component 2	fructose	Carbohydrate metabolism	PTS system
ECs3059	0.519063	-0.049215	0.0748418	-1.07114	7	fructose-specific PTS transport system protein	fructose	Carbohydrate metabolism	PTS system	Fructose and mannose metabolism
ECs5000	0.722021	-0.456177	-0.893385	-0.00151715	7	sorbose-permease PTS system IIC component	fructose	Carbohydrate metabolism	PTS system	Fructose and mannose metabolism
ECs5001	0.703251	-0.283892	-1.37169	0.072249	7	sorbose-permease PTS system IIB component	fructose	Carbohydrate metabolism	PTS system	Fructose and mannose metabolism
ECs0397	0.447798	0.00463842	0.202173	-1.40203	7	beta-D-galactosidase	galactose	Carbohydrate metabolism		Galactose metabolism
ECs2850					7	putative galactokinase	galactose	Other category
ECs2899	0.49578	-0.703037	-0.416327	0.233074	7	tagatose-bisphosphate aldolase 1	galactose	Carbohydrate metabolism		Galactose metabolism
ECs2852	0.717034	-0.882378	-1.06827	0.257882	7	putative colanic acid biosynthsis UDP-glucose lipid carrier transferase	UDP-glucose	Other category
ECs4449	0.440408	0.0211064	0.102414	-1.02313	7	xylose binding protein transport system	xylose	Transport	ABC transporter	ABC transporters
ECs4450	0.594872	-0.0776828	-0.0602936	-0.948003	7	putative ATP-binding protein of xylose transport system	xylose	Transport	ABC transporter	ABC transporters
ECs3241	0.650483	-0.257891	0.153947	-1.5464	7	sucrose transport protein	sucrose	Transport
ECs1896	0.568687	-0.252836	-1.48855	0.27292	7	putative beta-phosphoglucomutase	starch and sucrose	Carbohydrate metabolism		Starch and sucrose metabolism
ECs2849	0.677685	-0.569505	-1.2944	0.2523	7	putative colanic acid biosynthesis glycosyl transferase	glycosyl transferase	Other category
ECs2862	0.580522	-0.954351	-0.986095	0.42707	7	putative glycosyl transferase	glycosyl transferase	Other category
ECs0764	0.648433	-0.625075	-1.16764	0.286343	7	putative glutamate mutase S	carbon metabolism	Other category		Carbon metabolism
ECs0583	0.665679	-0.740777	-1.14025	0.300319	7	putative carbamate kinase	carbon metabolism	Other category		Carbon metabolism
ECs1131	0.616551	-0.204761	0.212963	-1.85168	7	processing of HyaA and HyaB proteins	HyaA; HyaB	Other category
ECs1132	0.607794	-0.297302	0.238747	-1.55926	7	hydrogenase 1 formation factor HyaE	HyaE	Other category
ECs1133	0.713673	-0.371845	0.120593	-1.51301	7	hydrogenase-1 cofactor biosynthesis protein hyaF	HyaF	Other category
ECs1128	0.592544	0.056941	0.062863	-2.02536	7	hydrogenase-1 small subunit	hydrogenase; nitrotoluene degradation	Other category		Nitrotoluene degradation
ECs1129	0.543362	0.0372019	0.155601	-2.07141	7	hydrogenase-1 large subunit	hydrogenase; nitrotoluene degradation	Other category		Nitrotoluene degradation
ECs3577	0.723451	-0.203433	-0.495459	-0.495988	7	hydrogenase 3 large subunit	hydrogenase	Other category
ECs3576	0.736673	-0.13137	-0.519788	-0.619669	7	formate hydrogenlyase subunit-7 component F	hydrogenlyase	Other category
ECs0405	0.689512	-0.579658	-0.852563	0.108617	7	2-keto-4-pentenoate hydratase	hydratase; phenylalanine	Amino acid and protein metabolism		Phenylalanine metabolism
ECs0402	0.702218	-0.763661	-1.48855	0.330078	7	3-(3-hydroxyphenyl)propionate hydroxylase	hydroxylase; phenylalanine	Amino acid and protein metabolism		Phenylalanine metabolism
ECs0569	0.829092	-1.1223	-0.999888	0.125595	7	hydroxypyruvate isomerase	hydroxypyruvate; glyoxylate and dicarboxylate metabolism	Other category		Glyoxylate and dicarboxylate metabolism
ECs3944	0.627298	-0.48838	-1.53172	0.327728	7	L-tartrate dehydratase subunit A	dehydratase; glyoxylate and dicarboxylate metabolism	Other category		Glyoxylate and dicarboxylate metabolism
ECs3945	0.688735	-0.656517	-1.47672	0.308011	7	L-tartrate dehydratase subunit B	dehydratase; glyoxylate and dicarboxylate metabolism	Other category		Glyoxylate and dicarboxylate metabolism
ECs2509	0.573222	-0.125403	0.155726	-1.45715	7	putative tartrate dehydrogenase	dehydrogenase; glyoxylate and dicarboxylate metabolism	Other category		Glyoxylate and dicarboxylate metabolism
ECs5061	0.67273	-0.308993	-0.00426403	-0.949254	7	selenopolypeptide subunit of formate dehydrogenase H	dehydrogenase	Other category
ECs3741	0.63814	-0.767116	-0.54103	0.132468	7	putative dehydrogenase	dehydrogenase; purine	Nucleotide metabolism and DNA recombination		Purine metabolism
ECs0579	0.5397	-0.703037	-0.670242	0.297612	7	ureidoglycolate dehydrogenase	dehydrogenase; purine	Nucleotide metabolism and DNA recombination		Purine metabolism
ECs3567	0.766297	-0.652436	-1.23072	0.135922	7	putative oxidoreductase	oxidoreductase	Other category
ECs2483	0.73476	-0.502086	-0.099697	-0.706884	7	putative oxidoreductase	oxidoreductase	Other category
ECs1275	0.549089	-0.311505	-1.19055	0.269139	7	putative oxidoreductase	oxidoreductase	Other category
ECs0369	0.657483	-0.415355	-1.36339	0.221626	7	putative oxidoreductase subunit	oxidoreductase	Other category
ECs4892	0.68964	-0.540518	-1.15208	0.186977	7	putative amino acid amidohydrolase	phenylalanine	Amino acid and protein metabolism		Phenylalanine metabolism
ECs0403	0.503981	-0.587205	-1.08895	0.419523	7	2,3-dihydroxyphenylpropionate 1,2-dioxygenase	phenylalanine	Amino acid and protein metabolism		Phenylalanine metabolism
ECs3157	0.549402	-0.65677	-1.17137	0.415463	7	putative sulfatase / phosphatase	phosphatase	Other category
ECs5081	0.675832	-0.415355		0.390703	7	phosphonate metabolism	phosphonate	Other category		Phosphonate and phosphinate metabolism
ECs4354	0.655871	-0.688648	-0.692221	0.14558	7	phosphotransferase system HPr enzyme	phosphotransferase	Other category
ECs0386	0.444839	-0.235035	0.462772	-2.41827	7	putative citrate synthase	propanoate	Other category		Propanoate metabolism
ECs0385	0.547012	-0.285587	0.35582	-1.97245	7	putative phosphonomutase 2	propanoate	Other category		Propanoate metabolism
ECs0387	0.508901	-0.260721	0.408725	-2.30248	7	hypothetical protein	propanoate	Other category		Propanoate metabolism
ECs2480	0.458532	-0.228546	0.221768	-0.882763	7	hypothetical protein	propanoate	Other category		Propanoate metabolism
ECs2401	0.653028	-0.618696	-0.998746	0.232098	7	putative enzyme	propanoate	Other category		Propanoate metabolism
ECs0331	0.64506	-0.341247	-0.932606	0.075094	7	putative NADH-dependent flavin oxidoreductase	flavin	Other category
ECs0047	0.762843	-0.836568	-1.20478	0.208381	7	putative ferredoxin	ferredoxin	Other category
ECs3566	0.857968	-0.759596	-1.45059	0.065437	7	putative flavodoxin	flavodoxin	Other category
ECs1283	0.721343	-0.663191	-1.2703	0.222909	7	hemolysin activator-related protein	hemolysin	Other category
ECs1136	0.605177	-0.174622	0.00679889	-0.946205	7	phosphoanhydride phosphorylase	riboflavin	Other category		Riboflavin metabolism
ECs5158	0.578272	-0.714336	-1.53454	0.466415	7	putative alpha helical protein	alpha helical protein	Nucleotide metabolism and DNA recombination
ECs3591	0.719168	-0.613181	-1.01962	0.135719	7	hypothetical protein	aminobenzoate degradation	Other category		Aminobenzoate degradation
ECs2454					7	acetylornithine delta-aminotransferase	arginine and proline metabolism	Amino acid and protein metabolism		Arginine and proline metabolism
ECs0582	0.653644	-0.738128	-1.32949	0.355611	7	putative carboxylase	carboxylase	Other category
ECs0043	0.70758	-0.7583	-1.39618	0.304668	7	putative carnitine transporter	carnitine	Transport
ECs0300	0.5819	-0.65589	-1.23418	0.392999	7	putative CI repressor	CI repressor	Transcription and RNA processing
ECs3387	0.435976	-0.00507555	0.0827411	-0.88137	7	putative thiosulfate sulfurtransferase	cysteine and methionine metabolism	Amino acid and protein metabolism		Cysteine and methionine metabolism
ECs3318	0.707052	-0.650194	-0.876094	0.122637	7	detox protein	detox	Other category
ECs2512	0.444264	-0.240079	0.168386	-0.673406	7	putative diogenase beta subunit	diogenase	Other category
ECs1636	0.700145	-0.238573	-0.327475	-0.568869	7	DNA packaging protein	DNA packaging	Nucleotide metabolism and DNA recombination
ECs2173	0.696885	-0.222451	-0.336433	-0.569073	7	putative DNA-packaging protein	DNA packaging	Nucleotide metabolism and DNA recombination
ECs0284	0.653144	-0.716109	-0.80192	0.20578	7	DNA-invertase	DNA-invertase	Nucleotide metabolism and DNA recombination
ECs1777	0.711923	-0.353479	-1.52466	0.136344	7	endonuclease	endonuclease	Nucleotide metabolism and DNA recombination
ECs1777	0.711923	-0.353479	-1.52466	0.136344	7	endonuclease	endonuclease	Nucleotide metabolism and DNA recombination
ECs1022	0.656825	-0.618	-1.14618	0.266985	7	putative chaperone	chaperone	Other category
ECs0593	0.628111	-0.311676	-1.6427	0.25597	7	putative chaperone	chaperone	Other category
ECs3220	0.63768	-0.278154	-1.26541	0.147757	7	putative chaperone	chaperone	Other category
ECs4881	0.63768	-0.591811	-0.859943	0.196547	7	probable pyruvate formate lyase activating enzyme 2	pyruvate	Other category
ECs3316	0.696885	-0.864305	-1.11919	0.293973	7	ethanolamine utilization protein EutJ	ethanolamine	Stress response
ECs1610	0.920163	-0.533138	-3.56061	0.0216053	7	excisionase	excisionase	Nucleotide metabolism and DNA recombination
ECs3580	0.684591	-0.322981	-0.885353	-0.0255733	7	formate hydrogenlyase subunit-7 component B	formate	Other category
ECs2481	0.713506	-0.471613	-0.0615233	-0.736768	7	putative kinase	kinase	Other category
ECs4806	0.662038	-0.61147	-1.074	0.238073	7	putative kinase	kinase	Other category
ECs0504	0.646136	0.0422648	-1.14704	-0.194257	7	nitrogen regulatory protein P-II 2	nitrogen	Transcription and RNA processing
ECs3054	0.67429	-0.398548	-1.12344	0.127208	7	hypothetical protein	purine	Nucleotide metabolism and DNA recombination		Purine metabolism
ECs3057	0.681165	-0.540518	-1.20087	0.212295	7	hypothetical protein	pyrimidine	Nucleotide metabolism and DNA recombination		Pyrimidine metabolism
ECs1612	0.639229	-0.369892	-1.16378	0.175281	7	replication protein P	replication	Nucleotide metabolism and DNA recombination
ECs2205	0.713309	-0.347106	-0.848853	-0.0800447	7	putative replication protein	replication	Nucleotide metabolism and DNA recombination
ECs1611	0.620669	-0.477487	-1.46474	0.319987	7	putative replication protein	replication	Nucleotide metabolism and DNA recombination
ECs2103	0.573096	0.0461226	-0.0818489	-1.13112	7	putative sulfatase	sulfatase	Other category
ECs0580	0.781535	-0.802128	-1.52702	0.234453	7	multicopy suppressor fdrA	suppressor	Nucleotide metabolism and DNA recombination
ECs0686					7	putative tRNA ligase	tRNA ligase	Transcription and RNA processing
ECs4624	0.709418	-0.732364	-1.32372	0.278683	7	putative transcriptional regulator	TF	Transcription and RNA processing
ECs1091	0.448367	-0.0502526	0.123951	-0.93322	7	putative transcriptional regulator	TF	Transcription and RNA processing
ECs2925	0.66276	-0.626664	-1.09373	0.248822	7	putative regulator	TF	Transcription and RNA processing
ECs0367	0.672692	-0.812236	-0.924022	0.255528	7	putative transcription factor	TF	Transcription and RNA processing
ECs4621	0.599518	-0.899152	-1.074	0.413277	7	putative ARAC-type regulatory protein	TF	Transcription and RNA processing
ECs1388	0.73299	-0.475979	-0.702623	-0.103558	7	putative transcriptional regulator	TF	Transcription and RNA processing
ECs1588	0.635504	-0.124959	-0.779232	-0.154524	7	putative transcriptional activator	TF	Transcription and RNA processing
ECs5098	0.677321	-0.318555	-0.764733	-0.0721137	7	putative ARAC-type regulatory protein	TF	Transcription and RNA processing
ECs5325	0.547135	-0.0556992	-1.47374	0.162572	7	putative regulator	TF	Transcription and RNA processing
ECs1694	0.762843	-0.569505	-1.2944	0.118769	7	molybdenum transport protein	transport	Transport
ECs0572	0.753274	-0.712606	-1.11207	0.151559	7	putative transport protein	transport	Transport
ECs2851	0.796745	-0.892279	-1.32949	0.201461	7	probable export protein	transport	Transport
ECs0758	0.642215	-0.535983	-1.34092	0.295393	7	putative transport protein	transport	Transport
ECs0940	0.626431	-0.449488	-1.26139	0.259406	7	putative transport protein	transport	Transport		Ascorbate and aldarate metabolism
ECs0346	0.706532	-0.541094	-0.720474	-0.000455981	7	putative transporter	transport	Transport
ECs3252	0.667533	-0.397336	-0.870913	0.0497761	7	putative receptor protein	transport	Transport
ECs4222	0.664403	-0.479893	-0.868312	0.103021	7	putative transport protein	transport	Transport
ECs0366	0.845081	-1.08033	-1.87421	0.267189	7	hypothetical protein		Unknown
ECs0368	0.806646	-0.882378	-2.16688	0.302334	7	hypothetical protein		Unknown
ECs0581	0.745749	-0.909373	-1.12344	0.238434	7	hypothetical protein		Unknown
ECs1291	0.762843	-0.657916	-1.22029	0.141584	7	hypothetical protein		Unknown
ECs1293	0.69746	-0.795819	-0.827562	0.180138	7	hypothetical protein		Unknown
ECs1295	0.858153	-0.92618	-1.65107	0.167559	7	hypothetical protein		Unknown
ECs1531	0.760648	-0.677061	-1.3601	0.187104	7	hypothetical protein		Unknown
ECs1581	0.771976	-0.606893	-1.55493	0.176692	7	hypothetical protein		Unknown
ECs1582	0.779372	-0.703037	-1.36339	0.167559	7	hypothetical protein		Unknown
ECs1783	0.767208	-0.812977	-1.36602	0.230018	7	hypothetical protein		Unknown
ECs1950	0.73815	-0.545408	-1.11615	0.100307	7	hypothetical protein		Unknown
ECs2117	0.710787	-0.688648	-0.908444	0.14558	7	hypothetical protein		Unknown
ECs2187	0.791759	-0.855791	-1.40883	0.214232	7	hypothetical protein		Unknown
ECs2260	0.766364	-0.812915	-1.35811	0.22967	7	hypothetical protein		Unknown
ECs2758	0.787024	-0.753227	-1.70864	0.237329	7	hypothetical protein		Unknown
ECs2955	0.748028	-0.8282	-0.928936	0.147757	7	hypothetical protein		Unknown
ECs3003	0.722646	-0.639437	-1.08371	0.161915	7	hypothetical protein		Unknown
ECs3496	0.796955	-0.856137	-1.45241	0.214461	7	hypothetical protein		Unknown
ECs3504	0.73483	-0.73105	-1.14579	0.198387	7	hypothetical protein		Unknown
ECs4593	0.735444	-0.787594	-1.57311	0.306145	7	hypothetical protein		Unknown
ECs5066	0.762843	-0.86734	-1.4587	0.27292	7	hypothetical protein		Unknown
ECs5161	0.726029	-0.739851	-1.12827	0.210788	7	hypothetical protein		Unknown
ECs5303	0.782261	-0.763661	-1.73987	0.253117	7	hypothetical protein		Unknown
ECs2511	0.443752	-0.248129	0.206382	-0.755234	7	hypothetical protein		Unknown
ECs4390	0.434401	-0.0359831	0.245489	-1.38881	7	hypothetical protein		Unknown
ECs5108					7	hypothetical protein		Unknown
ECs5109					7	hypothetical protein		Unknown
ECs1387	0.672298	-0.196399	-0.499177	-0.356622	7	hypothetical protein		Unknown
ECs1394	0.715483	-0.219769	-0.668812	-0.305469	7	hypothetical protein		Unknown
ECs1395	0.64506	-0.233033	-0.481	-0.266077	7	hypothetical protein		Unknown
ECs1794					7	hypothetical protein		Unknown
ECs1975	0.645545	-0.0314803	-0.595441	-0.418288	7	hypothetical protein		Unknown
ECs1976	0.740185	-0.0242489	-0.589103	-0.747375	7	hypothetical protein		Unknown
ECs1978	0.787401	-0.184506	-0.686253	-0.54982	7	hypothetical protein		Unknown
ECs1979	0.717587	0.0277414	-0.652698	-0.693268	7	hypothetical protein		Unknown
ECs1993	0.793504	-0.258069	-0.497813	-0.66139	7	hypothetical protein		Unknown
ECs2169	0.660652	-0.242603	-0.499896	-0.276746	7	hypothetical protein		Unknown
ECs2494	0.654303	-0.0932713	-0.444245	-0.497417	7	hypothetical protein		Unknown
ECs2695	0.722262	-0.225036	-0.545499	-0.416846	7	hypothetical protein		Unknown
ECs3817	0.775509	-0.180003	-0.628262	-0.568601	7	hypothetical protein		Unknown
ECs4389	0.641183	-0.22686	-0.305857	-0.435828	7	hypothetical protein		Unknown
ECs4392	0.666386	-0.0496495	-0.189898	-1.03453	7	hypothetical protein		Unknown
ECs3869	0.575244	-0.389379	-1.11427	0.259674	7	hypothetical protein		Unknown
ECs0606	0.664403	-0.990719	-1.02246	0.348143	7	hypothetical protein		Unknown
ECs1298	0.649989	-0.82478	-1.09769	0.337952	7	hypothetical protein		Unknown
ECs1026	0.61479	-0.606893	-1.14946	0.31777	7	hypothetical protein		Unknown
ECs1240	0.663545	-0.482218	-1.16544	0.200723	7	hypothetical protein		Unknown
ECs1778	0.670551	-0.513187	-1.20529	0.215909	7	hypothetical protein		Unknown
ECs3112	0.630671	-0.387184	-1.22986	0.214079	7	hypothetical protein		Unknown
ECs1094	0.635688	-0.430393	-1.25059	0.234892	7	hypothetical protein		Unknown
ECs2801	0.633631	-0.446126	-1.17102	0.2264	7	hypothetical protein		Unknown
ECs1193	0.635463	-0.428733	-1.0853	0.19163	7	hypothetical protein		Unknown
ECs1951	0.640953	-0.431884	-1.15677	0.205097	7	hypothetical protein		Unknown
ECs1401	0.62153	-0.487675	-1.11726	0.249389	7	hypothetical protein		Unknown
ECs1192	0.653644	-0.604597	-0.924022	0.201461	7	hypothetical protein		Unknown
ECs2983	0.666216	-0.587205	-1.14025	0.239472	7	hypothetical protein		Unknown
ECs3503	0.672817	-0.505381	-1.03356	0.160915	7	hypothetical protein		Unknown
ECs2979	0.639229	-0.775358	-0.950202	0.295909	7	hypothetical protein		Unknown
ECs0826	0.642479	-0.7134	-1.15061	0.323182	7	hypothetical protein		Unknown
ECs2742	0.675155	-0.716948	-1.22562	0.29914	7	hypothetical protein		Unknown
ECs1296	0.67429	-0.755223	-1.12344	0.289727	7	hypothetical protein		Unknown
ECs2759	0.69385	-0.638498	-1.18107	0.232098	7	hypothetical protein		Unknown
ECs4815	0.700192	-0.636476	-1.22029	0.231592	7	hypothetical protein		Unknown
ECs2984	0.688042	-0.658977	-1.2248	0.259314	7	hypothetical protein		Unknown
ECs3728	0.521895	-0.564811	-1.18107	0.413193	7	hypothetical protein		Unknown
ECs5159	0.535786	-0.767575	-1.02246	0.431525	7	hypothetical protein		Unknown
ECs0824	0.597763	-0.747489	-1.23122	0.405091	7	hypothetical protein		Unknown
ECs0950	0.58889	-0.45828	-1.35502	0.330078	7	hypothetical protein		Unknown
ECs5160	0.5397	-0.520715	-1.09146	0.356801	7	hypothetical protein		Unknown
ECs4591	0.558628	-0.501787	-1.31369	0.375729	7	hypothetical protein		Unknown
ECs2978	0.647774	-0.842799	-1.23122	0.376104	7	hypothetical protein		Unknown
ECs2977	0.66848	-0.679617	-1.36814	0.323739	7	hypothetical protein		Unknown
ECs0797	0.6828	-0.628929	-1.91344	0.364727	7	hypothetical protein		Unknown
ECs2740	0.661867	-0.755223	-1.5289	0.385037	7	hypothetical protein		Unknown
ECs5011	0.5397	-1.08033	-0.824393	0.455241	7	hypothetical protein		Unknown
ECs4797					7	hypothetical protein		Unknown
ECs0830	0.6828	-0.56439	-0.837296	0.105866	7	hypothetical protein		Unknown
ECs1194	0.65852	-0.373263	-1.02558	0.106545	7	hypothetical protein		Unknown
ECs1313	0.651252	-0.337704	-1.17179	0.140275	7	hypothetical protein		Unknown
ECs1314	0.635688	-0.154139	-1.60727	0.137254	7	hypothetical protein		Unknown
ECs1389	0.711052	-0.421684	-0.664737	-0.117672	7	hypothetical protein		Unknown
ECs1511	0.643403	-0.256485	-0.676886	-0.104789	7	hypothetical protein		Unknown
ECs1513	0.732228	-0.43566	-0.978229	0.000200496	7	hypothetical protein		Unknown
ECs1528	0.64506	-0.350816	-0.757253	0.00721653	7	hypothetical protein		Unknown
ECs1545	0.684775	-0.395785	-1.09769	0.100822	7	hypothetical protein		Unknown
ECs1547	0.688735	-0.305119	-0.906631	-0.0375771	7	hypothetical protein		Unknown
ECs1580	0.64506	-0.274276	-0.72473	-0.0665874	7	hypothetical protein		Unknown
ECs1586	0.64506	-0.492316	-0.607441	0.0216053	7	hypothetical protein		Unknown
ECs1594	0.689341	-0.37674	-0.609154	-0.140451	7	hypothetical protein		Unknown
ECs1595	0.700711	-0.368287	-0.676284	-0.129538	7	hypothetical protein		Unknown
ECs1774	0.528336	-0.00425587	-1.09065	0.0455299	7	hypothetical protein		Unknown
ECs1796	0.710657	-0.23728	-0.861074	-0.160474	7	hypothetical protein		Unknown
ECs1798	0.714053	-0.313572	-0.834864	-0.114846	7	hypothetical protein		Unknown
ECs1893	0.692639	-0.258786	-1.02813	-0.0318568	7	hypothetical protein		Unknown
ECs1930	0.696885	-0.138368	-1.00141	-0.159501	7	hypothetical protein		Unknown
ECs1948	0.63814	-0.233033	-0.924022	0.00571615	7	hypothetical protein		Unknown
ECs1949	0.667533	-0.21056	-1.52324	0.113071	7	hypothetical protein		Unknown
ECs1963	0.682323	-0.517854	-0.749211	0.0436687	7	hypothetical protein		Unknown
ECs2202	0.6527	-0.440201	-1.11003	0.179754	7	hypothetical protein		Unknown
ECs2203	0.697328	-0.283044	-1.08798	-0.000234276	7	hypothetical protein		Unknown
ECs2245	0.712276	-0.308812	-0.840799	-0.112047	7	hypothetical protein		Unknown
ECs2247	0.715318	-0.241508	-0.865302	-0.164703	7	hypothetical protein		Unknown
ECs2952	0.6828	-0.454576	-0.644924	-0.0495485	7	hypothetical protein		Unknown
ECs4235	0.636549	-0.503908	-0.786966	0.127208	7	hypothetical protein		Unknown
ECs4813	0.54252	-0.303237	-1.12344	0.255825	7	hypothetical protein		Unknown
ECs5288	0.658483	-0.288603	-1.06228	0.0631992	7	hypothetical protein		Unknown
ECs5406	0.810852	-0.624256	-1.44446	0.0938715	7	#N/A		Unknown
ECs5715	0.789994	-0.640795	-1.40078	0.130172	7	#N/A		Unknown
ECs5742	0.702218	-0.73289	-1.21662	0.26554	7	#N/A		Unknown
ECs5757	0.612017	-0.0338347	-0.113678	-1.00047	7	#N/A		Unknown
ECs5716	0.53065	-0.603096	-1.37244	0.453739	7	#N/A		Unknown
ECs5740	0.550282	-0.681983	-1.32683	0.452578	7	#N/A		Unknown
ECs5738	0.697955	-0.580032	-0.839559	0.0895505	7	#N/A		Unknown
ECs4012	0.197488	-1.04892	0.0526359	0.329558	8	N-acetylgalactosamine-specific PTS system enzyme IIC component	galactose	Carbohydrate metabolism	PTS system	Galactose metabolism
ECs4014	0.0945792	-0.859797	0.225864	0.200881	8	N-acetyl-galactosamine / galactosamine PTS system enzyme IIA component	galactose	Carbohydrate metabolism	PTS system	Galactose metabolism
ECs4018	0.0789983	-0.811518	0.0391282	0.362265	8	galactosamine-specific PTS system enzyme IIB component	galactose	Carbohydrate metabolism	PTS system	Galactose metabolism
ECs3958	0.229203	-0.741356	-0.712475	0.592057	8	evolved beta-D-galactosidase alpha subunit	galactose	Carbohydrate metabolism		Galactose metabolism
ECs4010	0.0820672	-1.23671	0.286705	0.251955	8	putative tagatose 6-phosphate kinase 2	galactose	Carbohydrate metabolism		Galactose metabolism
ECs4015	0.22742	-0.847365	-0.016885	0.300996	8	N-acetylgalactosamine-6-phosphate deacetylase	galactose	Carbohydrate metabolism		Galactose metabolism
ECs4017					8	tagatose-1,6-bisphosphate aldolase	galactose	Carbohydrate metabolism		Galactose metabolism
ECs3809	0.268825	-0.77932	-0.674488	0.56483	8	mannitol-specific PTS system enzyme II component	fructose	Carbohydrate metabolism	PTS system	Fructose and mannose metabolism
ECs4016	0.145857	-0.919012	-0.155826	0.471299	8	putative tagatose-6-phosphate aldose/ketose isomerase	tagatose	Carbohydrate metabolism
ECs4690	0.130007	-1.09943	-0.289949	0.584815	8	membrane-associated component of D-ribose high-affinity transport system	D-ribose	Transport	ABC transporter	ABC transporters
ECs4692	0.107933	-0.698574	0.0938133	0.258114	8	D-ribose high-affinity transport system permease protein	D-ribose	Transport	ABC transporter	ABC transporters
ECs2844	0.272845	-0.816515	-0.90958	0.631592	8	O antigen polymerase	lipopolysaccharide biosynthesis	Other category
ECs2843	0.263842	-0.724782	-0.903093	0.613279	8	putative glycosyl transferase	glycosyl transferase	Other category
ECs1520					8	prophage maintenance protein	prophage	Other category
ECs1624	0.63279		-2.36891	0.749002	8	lipoprotein Rz1 precursor	prophage	Stress response
ECs1625	0.336101	-0.692566	-1.41746	0.646296	8	Bor protein precursor	prophage	Other category
ECs1452	0.233999	-0.944199	-1.17661	0.730571	8	flagellar rod protein FlgC	flagellar	Cell motility	flagellar/fimbrial/curli/pili-related	Flagellar assembly
ECs1459	0.441638	-0.73656	-1.08676	0.524234	8	flagellar basal body protein FlgJ	flagellar	Cell motility	flagellar/fimbrial/curli/pili-related
ECs2108	0.318349	-1.13272	-1.43272	0.747697	8	putative fimbrial-like protein	fimbrial	Cell motility	flagellar/fimbrial/curli/pili-related
ECs0608	0.203227	-0.716109	-0.80192	0.625039	8	putative 2-component sensor protein	two-component	Pathogenicity	Two-component system	Two-component system
ECs2867	0.369801	-1.21386	-1.24561	0.703077	8	putative polysaccharide export protein	biofilm	Pathogenicity	Biofilm formation	Biofilm formation - Escherichia coli
ECs2819	0.349915	-0.741472	-0.766615	0.522374	8	his operon leader peptide	pathogenicity	Transcription and RNA processing
ECs5315	0.200724	-0.977474	-1.12044	0.746043	8	methyl-accepting chemotaxis protein I	chemotaxis	Stress response		Bacterial chemotaxis
ECs3997	-0.00658738	-0.739474	-0.0549035	0.458062	8	threonine dehydratase	biosynthesis of antibiotics	Stress response		Biosynthesis of antibiotics
ECs3127	0.187479	-0.990719	-0.720987	0.674907	8	anaerobic sn-glycerol-3-phosphate dehydrogenase membrane anchor subunit	glycerophospholipid	Other category		Glycerophospholipid metabolism
ECs3124	0.225474	-0.7145	-0.203411	0.381664	8	glycerophosphodiester phosphodiesterase	glycerophospholipid	Other category		Glycerophospholipid metabolism
ECs3995	-0.0111314	-0.962112	-0.196568	0.592442	8	putative kinase	propanoate	Other category		Propanoate metabolism
ECs0401	0.188534	-0.737547	-0.341602	0.485972	8	transcriptional regulator for mhp operon	regulator of operon	Transcription and RNA processing
ECs3563	0.207343	-0.873513	-0.105011	0.385495	8	regulator for gut operon	regulator of operon	Transcription and RNA processing
ECs3998	0.139965	-0.892279	-0.194508	0.489143	8	transcriptional activator of tdc operon	regulator of operon	Transcription and RNA processing
ECs3748	0.514652	-0.697376	0.0235134	-0.154687	8	putative synthases	synthases	Other category
ECs3960	0.346328	-0.83187	-1.22029	0.644862	8	putative oxidoreductase	oxidoreductase	Other category
ECs3630					8	putative oxidoreductase	oxidoreductase	Other category
ECs0289	0.235962	-0.822528	-0.901524	0.654204	8	putative integrase	integrase	Nucleotide metabolism and DNA recombination
ECs3058	0.333847	-0.710819	-0.807101	0.537071	8	putative kinase	pyrimidine	Nucleotide metabolism and DNA recombination		Pyrimidine metabolism
ECs2859	0.256026	-0.962994	-0.676284	0.616253	8	putative transferase	transferase	Other category
ECs2863	0.465592	-0.792649	-0.824393	0.455241	8	putative transferase	transferase	Other category
ECs5085	0.357378	-1.24826	-1.79083	0.775012	8	putative transcriptional regulator	TF	Transcription and RNA processing
ECs4349	0.48212	-0.91956	-0.22324	0.210729	8	putative GntR family regulatory protein	TF	Transcription and RNA processing
ECs4615	-0.0590642	-0.963249	-0.0401786	0.53562	8	putative transcriptional regulator	TF	Transcription and RNA processing
ECs3631	0.376891	-0.801307	-0.63634	0.477167	8	putative transport protein	transport	Transport
ECs3969					8	hypothetical protein		Unknown
ECs0290	0.343499	-0.773705	-0.904909	0.571568	8	hypothetical protein		Unknown
ECs0432	0.282987	-0.823554	-0.743198	0.585839	8	hypothetical protein		Unknown
ECs1366	0.166002	-0.723961	-0.796319	0.647461	8	hypothetical protein		Unknown
ECs2748	0.418747	-0.891783	-1.38066	0.630339	8	hypothetical protein		Unknown
ECs2865	0.411445	-0.82082	-0.852563	0.518042	8	hypothetical protein		Unknown
ECs5010	0.27449	-0.903708	-1.05323	0.678385	8	hypothetical protein		Unknown
ECs5234	0.349147	-0.614206	-1.51345	0.627954	8	hypothetical protein		Unknown
ECs5256	0.393483	-0.703037	-0.859943	0.501928	8	hypothetical protein		Unknown
ECs5257	0.193177	-0.720328	-0.684631	0.601195	8	hypothetical protein		Unknown
ECs5739	0.258596	-0.712987	-1.32455	0.688237	8	#N/A		Unknown
ECs5760	0.213556	-0.706391	-0.738135	0.599681	8	#N/A		Unknown
ECs5179	-0.363019	0.120426	0.0621131	0.0830428	9	50S ribosomal subunit protein L9	50S ribosome	Transcription and RNA processing		Ribosome
ECs1467	-0.583628	-0.129741	0.160433	0.299103	9	50S ribosomal subunit protein L32	50S ribosome	Transcription and RNA processing		Ribosome
ECs3472	-0.321462	-0.188111	0.0359166	0.326224	9	30S ribosomal subunit protein S16	30S ribosome	Transcription and RNA processing		Ribosome
ECs3948					9	30S ribosomal subunit protein S21	30S ribosome	Transcription and RNA processing		Ribosome
ECs4046	-0.356454	-0.065377	-0.00814965	0.297788	9	30S ribosomal subunit protein S15	30S ribosome	Transcription and RNA processing		Ribosome
ECs4103	-0.472258	0.00887613	0.161715	0.145609	9	30S ribosomal subunit protein S9	30S ribosome	Transcription and RNA processing		Ribosome
ECs4193	-0.483106	-0.0182867	0.085832	0.245354	9	30S ribosomal subunit protein S12	30S ribosome	Transcription and RNA processing		Ribosome
ECs3419					9	regulatory protein P-II for glutamine synthetase	two-component	Stress response	Two-component system	Two-component system
ECs0165					9	periplasmic serine protease Do; heat shock protein HtrA	heat shock protein	Pathogenicity	Two-component system	Two-component system
ECs0662	-0.408791	-0.00488993	0.174188	0.11133	9	cold shock protein	cold shock protein	Stress response
ECs5334					9	hyperosmotically inducible periplasmic protein	hyperosmotically inducible	Other category
ECs1856	-0.775091	0.214104	-0.13632	0.328565	9	osmotically inducible lipoprotein	osmotically inducible	Stress response
ECs4214					9	peptidyl-prolyl cis-trans isomerase A	cationic antimicrobial peptide	Stress response		Cationic antimicrobial peptide (CAMP resistance
ECs0187	-0.316575	0.00422216	0.0413866	0.183792	9	acetylCoA carboxylase carboxytransferase alpha subunit	biosynthesis of antibiotics	Stress response		Biosynthesis of antibiotics
ECs3810	-0.326606	-0.126	-0.0993332	0.385949	9	transketolase 1 isozyme	biosynthesis of antibiotics	Stress response		Biosynthesis of antibiotics
ECs4679					9	membrane-bound ATP synthase subunit c AtpE	oxidative phosphorylation	Other category		Oxidative phosphorylation
ECs4057	-0.339843	-0.00673297	-0.158908	0.352337	9	cell division protein HflB/FtsH protease	cell division	Cell division
ECs5128	-0.510054	0.0166522	0.238818	0.070807	9	elongation factor P	elongation factor	Nucleotide metabolism and DNA recombination
ECs0781					9	putative homeobox protein	homeobox	Other category
ECs1715	-0.316256	-0.0365136	0.00645301	0.245452	9	glutamyl-tRNA reductase	porphyrin and chlorophyll metabolism	Other category		Porphyrin and chlorophyll metabolism
ECs2873	-0.340239	-0.144314	-0.0641871	0.380241	9	uridine/cytidine kinase	pyrimidine	Nucleotide metabolism and DNA recombination		Pyrimidine metabolism
ECs2435	-0.551516	0.042577	-0.20806	0.431304	9	part of a kinase	kinase	Other category
ECs2306					9	possible chaperone	chaperone	Other category
ECs4918	-0.237695	-0.175029	0.200123	0.119224	9	putative transcriptional regulator	TF	Transcription and RNA processing
ECs0135	-0.412572	-0.146328	0.0663199	0.318965	9	aspartate 1-decarboxylase	beta-Alanine	Amino acid and protein metabolism		beta-Alanine metabolism
ECs0969	-0.362983	0.113131	-0.132383	0.253032	9	protein chain initiation factor IF-1	protein chain initiation factor	Amino acid and protein metabolism
ECs4686	-0.318697	0.0218314	-0.297309	0.400806	9	asparagine synthetase A	asparagine	Amino acid and protein metabolism		Biosynthesis of amino acids
ECs0451	-0.423515	0.246617	-0.141802	0.161076	9	branched chain amino acid transport system II carrier protein	amino acid transport	Transport
ECs0945	-0.407157	0.0174223	-0.189152	0.383162	9	arginine 3rd transport system permease protein	ABC transporter	Transport	ABC transporter	ABC transporters
ECs4071	-0.299616	-0.0839399	-0.144132	0.375647	9	hypothetical protein	ABC transporter	Transport	ABC transporter	ABC transporters
ECs0790	-0.324616	0.0640496	0.143243	0.0302539	9	hypothetical protein		Unknown
ECs0817					9	hypothetical protein		Unknown
ECs3073	-0.319377	0.168144	0.0734729	-0.00931946	9	hypothetical protein		Unknown
ECs4699	-0.51423	-0.0357995	-0.0460096	0.372022	9	hypothetical protein		Unknown
ECs4895	-0.355493	-0.0750052	0.206462	0.105517	9	hypothetical protein		Unknown
ECs5032	-0.393701	0.194641	-0.156047	0.209995	9	hypothetical protein		Unknown
ECs5780	-0.417399	0.210562	0.00729363	0.0703215	9	#N/A		Unknown
ECs1253					10	hypothetical protein	pyrimidine	Nucleotide metabolism and DNA recombination		Pyrimidine metabolism
ECs1254	0.375727	0.33186	-0.747203	-0.314867	10	putative enzyme	pyrimidine	Nucleotide metabolism and DNA recombination		Pyrimidine metabolism
ECs1255	0.311916	0.342331	-0.670242	-0.275646	10	putative acetyltransferase	pyrimidine	Nucleotide metabolism and DNA recombination		Pyrimidine metabolism
ECs1257					10	putative synthetase	pyrimidine	Nucleotide metabolism and DNA recombination		Pyrimidine metabolism
ECs1258	0.461175	0.262044	-0.917102	-0.248377	10	hypothetical protein	pyrimidine	Nucleotide metabolism and DNA recombination		Pyrimidine metabolism
ECs1793					10	major head protein/prohead protease	prophage	Amino acid and protein metabolism
ECs1937	0.412592	0.373886	-1.0009	-0.315881	10	phage superinfection exclusion protein	prophage	Stress response
ECs3222	0.558543	0.0734919	-1.30533	-0.0147624	10	putative fimbrial-like protein	fimbrial	Cell motility	flagellar/fimbrial/curli/pili-related
ECs1989	0.515392	0.190333	-0.399012	-0.674008	10	putative copper/zinc-superoxide dismutase	SOS response	Other category
ECs0639					10	putative aminotransferase	stress	Stress response
ECs3267	0.348867	0.243306	-1.02813	0.00204474	10	putative PTS system enzyme IIB component	carbohydrate metabolism	Carbohydrate metabolism	PTS system
ECs4870	0.676717	0.157814	-0.59155	-0.9175	10	5,10-methylenetetrahydrofolate reductase	carbon metabolism	Other category		Carbon metabolism
ECs1892	0.416567	0.0607279	-1.11615	0.142867	10	putative oxidoreductase	oxidoreductase	Other category
ECs2381	0.415534	0.301462	-0.637838	-0.414257	10	putative oxidoreductase Fe-S subunit	oxidoreductase	Other category
ECs4916					10	thiamin biosynthesis protein ThiE	thiamine	Other category		Thiamine metabolism
ECs2583	0.362519	0.385213	-1.21515	-0.158657	10	putative cytochrome C-type protein	cytochrome	Other category
ECs3818	0.487404	0.263696	-0.442629	-0.713524	10	methionine adenosyltransferase 1	methionine	Amino acid and protein metabolism		Biosynthesis of amino acids
ECs4759					10	tetrahydropteroyltriglutamate methyltransferase	methionine	Amino acid and protein metabolism		Biosynthesis of amino acids
ECs5099	0.633432	0.189624	-0.261891	-1.53047	10	biodegradative arginine decarboxylase	arginine degradation	Amino acid and protein metabolism		Arginine and proline metabolism
ECs3540					10	ATP-binding component of glycine betaine / proline transport system	ABC transporter	Transport	ABC transporter	ABC transporters
ECs3542					10	high-affinity glycine betaine / proline transport system protein	ABC transporter	Transport	ABC transporter	ABC transporters
ECs5097	0.476967	0.425838	-0.371774	-1.47415	10	putative amino acid/amine transport protein	transport	Transport
ECs0505	0.353912	0.371529	-0.617997	-0.453294	10	probable ammonium transporter	transport	Transport
ECs1890	0.382379	0.225833	-1.07888	-0.00218359	10	putative binding-protein dependent transport protein	transport	Transport
ECs2302					10	putative transport protein	transport	Transport
ECs0261	0.336759	0.281866	-0.789301	-0.140742	10	hypothetical protein		Unknown
ECs0262	0.440327	0.233586	-1.04248	-0.111154	10	hypothetical protein		Unknown
ECs0881	0.618821	0.170434	-0.354787	-1.09498	10	hypothetical protein		Unknown
ECs0928					10	hypothetical protein		Unknown
ECs1618	0.468604	0.277792	-1.08309	-0.208918	10	hypothetical protein		Unknown
ECs1936	0.539424	0.335135	-1.18826	-0.414179	10	hypothetical protein		Unknown
ECs3952	1.43343	1.3558	0.517101	0.743657	10	hypothetical protein		Unknown
ECs3953	1.88995	1.38874	0.491804	0.317315	10	hypothetical protein		Unknown
ECs3988	1.5159	1.28543	0.800656	0.446611	10	hypothetical protein		Unknown
ECs4479	1.58309	1.143	0.309011	1.03164	10	hypothetical protein		Unknown
ECs5761	1.76541	1.24169	0.806194	0.255153	10	#N/A		Unknown

## Sheet: Table S3 Sheet 2
Additional file 3: Table S3 Sheet 2 Propensity and module of E. coli genes during treatment of 5 µg ClO2 after 1, 2 and 3 hour (hr). Co-expression network of each module was showing in Fig. 7. Different modules were separated by different colors for easy view.
gene_id	5 µg_1 hr_propensity	5 µg_2 hr_propensity	5 µg_3 hr_propensity	5 µg_ctrl_propensity	Module	annotation	highlighted_function	function_category	selected_sub-category	KEGG_pathway
ECs3497	1.03185	1.65606	0.513157	0.838414	1	holin protein	prophage	Other category	prophage
ECs0818	0.763958	1.34838	0.948874	0.956978	1	holin protein S	prophage	Other category	prophage
ECs2980	0.799046	2.07187	0.577804	0.605152	1	hypothetical protein NinE	prophage	Other category	prophage
ECs1644	1.10789	1.75438	0.513424	0.664248	1	minor tail protein	prophage	Other category	prophage
ECs1638	0.920259	1.99041	0.63879	0.496001	1	minor tail protein	prophage	Other category	prophage
ECs1617	0.78104	1.70285	1.09975	0.436288	1	NinE protein	prophage	Other category	prophage
ECs1937	1.26907	1.52463	0.911289	0.305582	1	phage superinfection exclusion protein	prophage	Stress response	prophage
ECs1213	0.867594	1.92046	0.638575	0.618459	1	putative endolysin	prophage	Other category	prophage
ECs2968	0.878467	1.92102	0.629472	0.61627	1	putative endolysin	prophage	Other category	prophage
ECs1622	0.915438	1.95237	0.526327	0.655784	1	putative endolysin	prophage	Other category	prophage
ECs2734	1.02795	1.97158	0.492849	0.556502	1	putative head completion protein	prophage	Other category	prophage
ECs1530	1.00894	1.91497	0.431872	0.695017	1	putative holin	prophage	Other category	prophage
ECs1782	1.03151	1.6571	0.491475	0.860456	1	putative holin protein	prophage	Other category	prophage
ECs2261	1.04331	1.5674	0.525064	0.900486	1	putative holin protein	prophage	Other category	prophage
ECs1621	0.857504	2.00855	0.552255	0.633478	1	putative holin protein	prophage	Other category	prophage
ECs1100	0.915365	1.6721	0.484484	0.972546	1	putative holin protein	prophage	Other category	prophage
ECs1092	0.832216	2.04998	0.707819	0.456197	1	putative lipoprotein Rz1 protein precursor	prophage	Transport	prophage
ECs1110	1.1706	1.62811	0.455871	0.783013	1	putative major head protein	prophage	Other category	prophage
ECs2730	1.17615	1.61611	0.458031	0.786724	1	putative major head protein	prophage	Other category	prophage
ECs0836	1.09271	1.8514	0.536179	0.561556	1	putative minor tail protein	prophage	Other category	prophage
ECs1116	1.05368	1.91669	0.477257	0.599815	1	putative minor tail protein	prophage	Other category	prophage
ECs2165	1.01415	1.99475	0.476675	0.56507	1	putative minor tail protein	prophage	Other category	prophage
ECs2724	1.14146	1.78392	0.51617	0.598111	1	putative minor tail protein	prophage	Other category	prophage
ECs2948	1.14146	1.78392	0.51617	0.598111	1	putative minor tail protein	prophage	Other category	prophage
ECs2953	1.20949	1.83913	0.392023	0.604462	1	putative minor tail protein	prophage	Other category	prophage
ECs1554	0.858338	1.94173	0.676888	0.56714	1	putative minor tail protein	prophage	Other category	prophage
ECs1115	0.979633	2.07927	0.475633	0.519343	1	putative minor tail protein	prophage	Other category	prophage
ECs0835	0.902724	1.91837	0.575265	0.650692	1	putative minor tail protein	prophage	Other category	prophage
ECs0839	0.980166	1.83522	0.508178	0.722313	1	putative minor tail protein	prophage	Other category	prophage
ECs1591	0.984789	1.83595	0.452379	0.775293	1	putative prohead protease	prophage	Other category	prophage
ECs2237	0.836501	1.93209	0.706488	0.567972	1	putative tail assembly protein	prophage	Other category	prophage
ECs1558	0.878418	1.91264	0.606133	0.648929	1	putative tail assembly protein	prophage	Other category	prophage
ECs2721	1.15509	1.42266	0.697585	0.745823	1	putative tail assembly protein	prophage	Other category	prophage
ECs2945	1.15509	1.42266	0.697585	0.745823	1	putative tail assembly protein	prophage	Other category	prophage
ECs1559	0.97731	2.15823	0.469766	0.451	1	putative tail assembly protein	prophage	Other category	prophage
ECs0840	0.878985	1.99335	0.511178	0.669215	1	putative tail assembly protein	prophage	Other category	prophage
ECs0841	0.994168	1.94065	0.478621	0.636232	1	putative tail assembly protein	prophage	Other category	prophage
ECs0844	1.01967	2.0736	0.379205	0.584697	1	putative tail fiber protein	prophage	Other category	prophage
ECs1123	0.963963	1.68352	0.537239	0.856232	1	putative tail fiber protein	prophage	Other category	prophage
ECs0837	1.00233	1.88351	0.501666	0.659339	1	putative tail length tape measure protein precursor	prophage	Other category	prophage
ECs2725	1.21412	1.48112	0.635471	0.693279	1	putative tail length tape measure protein precursor	prophage	Other category	prophage
ECs0825	0.926861	1.95696	0.587447	0.575558	1	putative terminase large subunit	prophage	Nucleotide metabolism and DNA recombination	prophage
ECs2985	0.96739	2.0058	0.50542	0.572262	1	Ren protein	prophage	Other category	prophage
ECs1613	0.987764	1.8971	0.64235	0.513739	1	Ren protein	prophage	Other category	prophage
ECs1646	0.914447	2.00501	0.517739	0.614543	1	tail assembly protein	prophage	Other category	prophage
ECs1647	0.906355	1.95047	0.615788	0.573275	1	tail assembly protein	prophage	Other category	prophage
ECs1651	0.821535	1.99032	0.744215	0.487149	1	tail fiber assembly protein	prophage	Other category	prophage
ECs4552	0.959236	1.7514	0.864207	0.452555	1	EscF protein	T3SS	Pathogenicity	T3SS	Bacterial secretion system
ECs4554	1.18283	1.30599	0.654947	0.875557	1	EspB protein	T3SS	Pathogenicity	T3SS
ECs4555	1.10028	1.66696	0.527527	0.742415	1	EspD protein	T3SS	Pathogenicity	T3SS
ECs4550	0.915232	2.09473	0.524539	0.519264	1	EspF protein	T3SS	Pathogenicity	T3SS	Pathogenic Escherichia coli infection
ECs3730	0.742765	1.91187	0.679788	0.711963	1	type III secretion protein ATP synthetase EivC	T3SS	Pathogenicity	T3SS
ECs3731	0.73972	2.06975	0.678725	0.562498	1	type III secretion protein EivA	T3SS	Pathogenicity	T3SS	Bacterial secretion system
ECs3734	0.692102	1.632	1.06642	0.631579	1	type III secretion protein EivF	T3SS	Pathogenicity	T3SS
ECs3729	0.990548	1.73272	0.531262	0.787257	1	type III secretion protein EivI	T3SS	Pathogenicity	T3SS
ECs3726	0.845747	1.92642	0.640538	0.63306	1	type III secretion protein EpaO	T3SS	Pathogenicity	T3SS	Bacterial secretion system
ECs3725	0.849523	1.90044	0.669937	0.623685	1	type III secretion protein EpaP	T3SS	Pathogenicity	T3SS
ECs3724	0.902097	2.00784	0.527487	0.614267	1	type III secretion protein EpaQ	T3SS	Pathogenicity	T3SS
ECs3723	0.833174	1.87284	0.839904	0.489346	1	type III secretion protein EpaR1	T3SS	Pathogenicity	T3SS
ECs3722	0.851457	2.11384	0.587672	0.500083	1	type III secretion protein EpaR2	T3SS	Pathogenicity	T3SS
ECs4568	0.875368	1.94065	0.566981	0.665795	1	type III secretion system protein EscN	T3SS	Pathogenicity	T3SS	Bacterial secretion system
ECs4271	1.08243	1.77887	0.525659	0.653764	1	putative ATP binding protein of ABC transporter	two-component system	Pathogenicity	two-component system	Two-component system
ECs0655	1.07432	1.77683	0.527152	0.662523	1	citrate lyase beta chain	two-component system	Pathogenicity	two-component system	Two-component system
ECs5135	0.71159	1.23031	0.929925	1.14559	1	flavoprotein subunit of fumarate reductase FrdA	two-component system	Stress response	two-component system	Two-component system
ECs5133	0.710627	1.36611	1.09774	0.838606	1	fumarate reductase FrdC	two-component system	Stress response	two-component system	Two-component system
ECs0652	1.04832	1.94512	0.467635	0.587722	1	hypothetical protein	two-component system	Pathogenicity	two-component system	Two-component system
ECs4925	1.07009	1.83369	0.532686	0.605719	1	hypothetical protein	two-component system	Stress response	two-component system	Two-component system
ECs0611	0.884301	2.08776	0.48914	0.594919	1	hypothetical protein	two-component system	Pathogenicity	two-component system	Two-component system
ECs5134	0.699904	1.45178	0.9768	0.892894	1	iron-sulfur protein subunit of fumarate reductase FrdB	two-component system	Stress response	two-component system	Two-component system
ECs0727	1.21348	1.73437	0.421389	0.671594	1	KdpF protein of high-affinity potassium transport system	two-component system	Pathogenicity	two-component system	Two-component system
ECs0612	0.808934	2.19066	0.483223	0.578393	1	putative resistance protein	two-component system	Pathogenicity	two-component system	Two-component system
ECs0610	0.961887	2.03091	0.539411	0.517864	1	putative resistance protein	two-component system	Pathogenicity	two-component system	Two-component system
ECs3464	0.749517	1.70892	0.909458	0.662076	1	3-deoxy-D-arabinoheptulosonate-7-phosphate synthase	antibiotics biosynthesis	Stress response	antibiotics biosynthesis	Biosynthesis of antibiotics
ECs3315	1.04634	1.94932	0.453021	0.600987	1	ethanolamine utilization protein EutG	antibiotics biosynthesis	Stress response	antibiotics biosynthesis	Biosynthesis of antibiotics
ECs4286	0.740338	1.99816	0.884195	0.416361	1	gluconokinase 2	antibiotics biosynthesis	Stress response	antibiotics biosynthesis	Biosynthesis of antibiotics
ECs2853	0.74103	1.64695	0.956877	0.681473	1	phosphomannomutase	antibiotics biosynthesis	Stress response	antibiotics biosynthesis	Biosynthesis of antibiotics
ECs1285	0.924272	2.09089	0.56151	0.474993	1	putative 3-oxoacyl-(acyl carrier protein) reductase	antibiotics biosynthesis	Stress response	antibiotics biosynthesis
ECs4804	1.05648	1.94384	0.533211	0.511911	1	putative aldolase	antibiotics biosynthesis	Stress response	antibiotics biosynthesis
ECs0757	0.984789	1.95451	0.502552	0.607313	1	putative fumarate hydratase	antibiotics biosynthesis	Stress response	antibiotics biosynthesis	Biosynthesis of antibiotics
ECs5231	0.63401	1.23768	1.06194	1.0799	1	ornithine carbamoyltransferase 1	antibiotics biosynthesis	Stress response	antibiotics biosynthesis	Biosynthesis of antibiotics
ECs4357	1.15803	1.39457	0.595536	0.877025	1	HicA-like protein	antibiotics resistance	Pathogencity	antibiotics resistance
ECs2092	1.08184	1.45248	0.972048	0.504627	1	hypothetical protein	antibiotics resistance	Stress response	antibiotics resistance	Vancomycin resistance
ECs5276	0.933631	2.11978	0.451845	0.552103	1	export and assembly outer membrane protein of type 1 fimbriae	fimbrial	Cell motility	cell motility
ECs5278	0.916457	2.10473	0.48914	0.545342	1	fimbrial morphology	fimbrial	Cell motility	cell motility
ECs5277	0.972324	1.99154	0.570896	0.5125	1	fimbrial morphology	fimbrial	Cell motility	cell motility
ECs5274	0.965563	2.0928	0.545067	0.44791	1	fimbrial protein	fimbrial	Cell motility	cell motility
ECs5275	0.947564	1.90064	0.571232	0.626096	1	periplasmic chaperone required for type 1 fimbriae	fimbrial	Pathogenicity	cell motility
ECs4430	1.03662	1.85128	0.635819	0.514973	1	putative fimbrial chaperone protein precursor	fimbrial	Cell motility	cell motility
ECs2108	0.8421	1.6891	0.440754	1.0771	1	putative fimbrial-like protein	fimbrial	Cell motility	cell motility
ECs1027	0.706156	2.35321	0.484266	0.524676	1	putative fimbrial-like protein	fimbrial	Cell motility	cell motility
ECs3222	1.05044	1.5094	0.992695	0.459858	1	putative fimbrial-like protein	fimbrial	Cell motility	cell motility
ECs0596	0.967013	2.1168	0.376809	0.599274	1	putative fimbrial-like protein	fimbrial	Cell motility	cell motility
ECs0257	0.842705	2.15168	0.615448	0.443147	1	flagellar biosynthesis	flagellar	Cell motility	cell motility
ECs2590	1.05379	1.85413	0.467833	0.670494	1	flagellar biosynthesis protein FlhB	flagellar	Cell motility	cell motility	Flagellar assembly
ECs2686	1.16904	1.44878	0.673394	0.731387	1	flagellar protein FliO	flagellar	Cell motility	cell motility	Flagellar assembly
ECs1925	1.1761	1.23075	0.902184	0.696787	1	hypothetical protein	biofilm formation	Pathogenicity	biofilm formation	Biofilm formation - Escherichia coli
ECs4259	1.24306	1.30342	0.741834	0.72515	1	maltodextrin phosphorylase	biofilm formation	Pathogenicity	biofilm formation	Biofilm formation - Escherichia coli
ECs0350	0.883381	2.07451	0.548463	0.546628	1	putative adhesin	biofilm formation	Pathogenicity	biofilm formation
ECs0336	0.878735	1.93532	0.654209	0.576169	1	putative invasin	biofilm formation	Pathogenicity	biofilm formation
ECs1417	1.19494	1.17195	0.673275	0.974413	1	transcriptional regulator for 2nd curli operon	biofilm formation	Pathogenicity	biofilm formation	Biofilm formation - Escherichia coli
ECs2090	0.99624	1.39021	1.1013	0.517864	1	hypothetical protein	quorum sensing	Pathogenicity	quorum sensing	Quorum sensing
ECs2087	0.702376	1.27908	1.14308	0.884349	1	putative ATP-binding component of a transport system	quorum sensing	Pathogenicity	quorum sensing	Quorum sensing
ECs3414	1.12147	1.89428	0.467746	0.561926	1	putative LACI-type transcriptional regulator	quorum sensing	Pathogenicity	quorum sensing
ECs0253	0.968386	1.55976	1.03586	0.44995	1	damage-inducible protein DinJ	SOS response	Stress response	SOS response
ECs1523	1.00148	1.88896	0.484861	0.672505	1	putative crossover junction endodeoxyribonuclease	SOS response	Nucleotide metabolism and DNA recombination
ECs1619	0.743237	1.92234	0.753706	0.623864	1	putative crossover junction endodeoxyribonuclease	SOS response	Nucleotide metabolism and DNA recombination
ECs1083	0.876915	2.17478	0.49176	0.515036	1	putative crossover junction endodeoxyribonuclease	SOS response	Nucleotide metabolism and DNA recombination
ECs5044	1.01471	1.47179	1.01651	0.508254	1	regulation of superoxide response regulon	SOS response	Transcription and RNA processing	transcriptional regulation
ECs2355	0.947054	1.53824	1.07968	0.446937	1	superoxide dismutase precursor (Cu-Zn)	SOS response	Stress response	SOS response
ECs1283	0.845993	2.10718	0.570787	0.52987	1	hemolysin activator-related protein	pathogenicity	Pathogenicity
ECs0595	1.04358	1.97065	0.562558	0.468326	1	SfmH protein	pathogenicity	Pathogenicity
ECs0224	1.10732	1.7439	0.516625	0.671682	1	putative membrane protein	pathogenicity	Pathogenicity	secretion	Bacterial secretion system
ECs0607	0.860779	2.01766	0.572708	0.599815	1	putative Vgr protein	pathogenicity	Pathogenicity	secretion	Bacterial secretion system
ECs4701	0.857432	1.73512	0.916554	0.518214	1	ilvGEDA operon leader peptide	pathogenicity	Pathogenicity
ECs1609	0.898978	1.89809	0.689745	0.554393	1	intergrase	pathogenicity	Pathogenicity
ECs4644	0.456087	2.00052	1.13601	0.44249	1	tryptophanase leader peptide	pathogenicity	Pathogenicity
ECs2026	1.17833	1.09973	0.821199	0.906874	1	methyl-accepting chemotaxis protein III	chemotaxis	Stress response	chemotaxis	Bacterial chemotaxis
ECs4693	0.818736	2.20502	0.456611	0.582209	1	D-ribose periplasmic binding protein	chemotaxis	Stress response	chemotaxis	Bacterial chemotaxis
ECs1415	1.2169	1.4179	0.583848	0.806044	1	curli production assembly/transport component CsgF	curli	Pathogenicity	cell motility
ECs1614	1.23044	1.16154	0.647368	0.9752	1	integral membrane drug resistance protein EmrE	stress response	Stress response
ECs1354	0.685883	1.35096	0.810609	1.17951	1	putative tellurium resistance protein TerC	stress response	Stress response	tellurium resistance
ECs1312	0.762891	1.64173	0.741481	0.88967	1	putative complement resistance protein precursor	stress response	Stress response
ECs3697	1.28984	1.08864	0.761442	0.865642	1	putative resistance proteins	stress response	Stress response
ECs0434	0.960899	1.32265	1.23374	0.481248	1	phosphate starvation-induced protein psiF	stress response	Stress response
ECs4877	1.0767	1.8852	0.566981	0.512842	1	PEP-protein phosphotransferase system enzyme I	stress response	Stress response		Phosphotransferase system (PTS
ECs3999	1.15389	1.50169	0.702869	0.664568	1	threonine dehydratase operon activator protein	stress response	Stress response
ECs3316	1.09421	1.84824	0.50112	0.599815	1	ethanolamine utilization protein EutJ	stress response	Stress response
ECs1623	0.794742	2.11575	0.542566	0.603761	1	putative endopeptidase	endopeptidase	Amino acid and protein metabolism
ECs2739	0.777113	2.4046	0.236681	0.661021	1	putative endopeptidase	endopeptidase	Amino acid and protein metabolism
ECs2849	0.922685	1.96688	0.574643	0.583604	1	putative colanic acid biosynthesis glycosyl transferase	polysaccharide	Other category
ECs4826	0.782143	2.28194	0.530324	0.467726	1	fructose-specific PTS system enzyme IIA component	fructose	Carbohydrate metabolism
ECs4830	0.958173	2.05117	0.574643	0.465059	1	L-rhamnose isomerase	fructose	Carbohydrate metabolism		Fructose and mannose metabolism
ECs3809	0.989398	1.52458	0.524685	0.997976	1	mannitol-specific PTS system enzyme II component	fructose	Carbohydrate metabolism		Fructose and mannose metabolism
ECs3808	0.946344	1.91068	0.568839	0.620079	1	mannitol-specific PTS system enzyme II component	fructose	Carbohydrate metabolism		Fructose and mannose metabolism
ECs4879	0.935136	1.99191	0.690318	0.425289	1	PTS system fructose-like IIB component 1	fructose	Carbohydrate metabolism
ECs3135	1.1888	1.39327	0.909596	0.517743	1	putative racemase	fructose	Carbohydrate metabolism		Fructose and mannose metabolism
ECs4831	0.845831	2.06651	0.616628	0.521618	1	rhamnulokinase	fructose	Carbohydrate metabolism		Fructose and mannose metabolism
ECs4829	0.984789	1.85535	0.706249	0.490522	1	rhamnulose-phosphate aldolase	fructose	Carbohydrate metabolism		Fructose and mannose metabolism
ECs5001	0.984789	1.93075	0.598276	0.530194	1	sorbose-permease PTS system IIB component	fructose	Carbohydrate metabolism		Fructose and mannose metabolism
ECs5000	1.18175	1.79337	0.579867	0.480789	1	sorbose-permease PTS system IIC component	fructose	Carbohydrate metabolism		Fructose and mannose metabolism
ECs3243	0.91536	1.7122	1.17085	0.214655	1	sucrose-6 phosphate hydrolase	fructose	Carbohydrate metabolism		Starch and sucrose metabolism
ECs5101	0.323085	1.92185	1.57721	0.19371	1	alpha-galactosidase	galactose	Carbohydrate metabolism		Galactose metabolism
ECs2897	0.961887	1.91809	0.584362	0.580635	1	galactitol-specific enzyme IIA of phosphotransferase system	galactose	Carbohydrate metabolism		Galactose metabolism
ECs2852	0.85171	1.99498	0.600763	0.601842	1	putative colanic acid biosynthsis UDP-glucose lipid carrier transferase	carbohydrate metabolism	Other category
ECs5172	0.613895	1.34036	1.27794	0.774378	1	probable hexulose-6-phosphate synthase	carbohydrate metabolism	Other category		Ascorbate and aldarate metabolism
ECs5171	0.660621	1.33719	1.20822	0.802455	1	putative PTS system enzyme IIA component	carbohydrate metabolism	Carbohydrate metabolism		Ascorbate and aldarate metabolism
ECs3267	0.973204	1.67972	0.894436	0.476324	1	putative PTS system enzyme IIB component	carbohydrate metabolism	Carbohydrate metabolism
ECs3699	0.59519	2.39824	0.55735	0.518352	1	2-deoxy-D-gluconate 3-dehydrogenase	carbohydrate metabolism	Carbohydrate metabolism		Pentose and glucuronate interconversions
ECs4623	0.916659	1.96158	0.559201	0.611132	1	PTS system arbutin-like IIC component	carbohydrate metabolism	Carbohydrate metabolism		Starch and sucrose metabolism
ECs3700	0.566802	2.43353	0.465476	0.609385	1	putative 5-keto 4-deoxyuronate isomerase	carbohydrate metabolism	Carbohydrate metabolism		Pentose and glucuronate interconversions
ECs4350	1.22299	1.11995	0.706168	0.961761	1	putative phosphotransferase system enzyme IIA	carbohydrate metabolism	Carbohydrate metabolism		Galactose metabolism
ECs1896	0.875368	1.97426	0.507628	0.69524	1	putative beta-phosphoglucomutase	carbohydrate metabolism	Carbohydrate metabolism		Starch and sucrose metabolism
ECs2858	0.714699	1.5441	0.815566	0.956667	1	GDP-D-mannose dehydratase	carbohydrate metabolism	Carbohydrate metabolism		Amino sugar and nucleotide sugar metabolism
ECs0583	0.993661	1.94814	0.435336	0.674792	1	putative carbamate kinase	carbon metabolism	Other category		Carbon metabolism
ECs0582	1.16839	1.62113	0.524174	0.720541	1	putative carboxylase	carbon metabolism	Other category
ECs0763	0.816876	2.10802	0.552255	0.578393	1	putative glutamate mutase L	carbon metabolism	Other category
ECs0764	0.864073	2.0122	0.523751	0.653025	1	putative glutamate mutase S	carbon metabolism	Other category		Carbon metabolism
ECs2956	1.11104	1.91933	0.495613	0.519071	1	hypothetical membrane protein	membrane	Other category
ECs4748	1.16185	1.47729	0.678244	0.705948	1	hypothetical membrane protein	membrane	Other category
ECs3635	0.971588	2.18518	0.404197	0.49931	1	hypothetical membrane protein	membrane	Other category
ECs4801	0.896112	2.10883	0.58628	0.460522	1	hypothetical membrane protein	membrane	Other category
ECs2992	1.17517	1.15664	0.851702	0.822765	1	putative membrane protein	membrane	Other category
ECs4462	0.939337	1.91933	0.698814	0.482736	1	putative membrane protein	membrane	Other category
ECs4460	0.790933	2.09564	0.624004	0.541959	1	putative outer membrane protein	outer membrane protein	Pathogenicity	outer membrane protein
ECs0594	0.956421	2.03649	0.493166	0.566492	1	putative outer membrane protein	outer membrane protein	Pathogenicity	outer membrane protein
ECs2915	0.945877	1.98447	0.587505	0.529168	1	putative outer membrane protein	outer membrane protein	Pathogenicity	outer membrane protein
ECs0843	1.07432	1.96586	0.421722	0.588909	1	putative outer membrane protein precursor	outer membrane protein	Pathogenicity	outer membrane protein
ECs0022	0.884487	1.71347	0.9396	0.48735	1	putative outer membrane usher protein precursor	outer membrane protein	Pathogenicity	outer membrane protein
ECs1825	1.3001	1.12204	0.65049	0.938779	1	bfpT-regulated chaperone-like protein	chaperone	Other category
ECs2305	0.744702	1.23846	0.976322	1.05504	1	possible chaperone	chaperone	Other category
ECs2306	0.741706	1.33157	0.889954	1.05791	1	possible chaperone	chaperone	Other category
ECs0593	0.858709	2.15841	0.494927	0.546371	1	putative chaperone	chaperone	Other category
ECs1022	0.948929	1.89872	0.563083	0.635098	1	putative chaperone	chaperone	Other category
ECs2916	0.920213	2.06223	0.617891	0.448018	1	putative chaperone	chaperone	Other category
ECs3220	0.990686	1.84271	0.7176	0.48488	1	putative chaperone	chaperone	Other category
ECs4021	0.973847	1.88289	0.665774	0.517341	1	putative chaperone	chaperone	Other category
ECs1279	0.857419	1.88905	0.646329	0.651377	1	putative chaperone protein	chaperone	Other category
ECs0580	1.05224	2.05079	0.476603	0.47143	1	multicopy suppressor fdrA	suppressor	Transcription and RNA processing	transcriptional regulation
ECs0359	0.645575	1.47316	0.975401	0.92938	1	probably transcriptional repressor of bet genes	repressor	Transcription and RNA processing	transcriptional regulation
ECs2766	1.1759	1.1596	0.676688	1.00243	1	putative repressor protein	repressor	Transcription and RNA processing	transcriptional regulation
ECs0300	0.801775	1.96273	0.632894	0.650906	1	putative CI repressor	repressor	Transcription and RNA processing	transcriptional regulation
ECs4824	1.02526	1.74697	0.529559	0.739498	1	frv protein	operon	Transcription and RNA processing	transcriptional regulation
ECs1250	0.756318	1.63015	0.974177	0.663995	1	C4-type zinc finger protein (TraR family)	TF	Transcription and RNA processing	transcriptional regulation
ECs4621	0.864922	2.18348	0.470537	0.541122	1	putative ARAC-type regulatory protein	TF	Transcription and RNA processing	transcriptional regulation
ECs0343	0.600693	2.35366	0.623513	0.4868	1	putative ARAC-type regulatory protein	TF	Transcription and RNA processing	transcriptional regulation
ECs5098	0.922461	1.99154	0.521962	0.615	1	putative ARAC-type regulatory protein	TF	Transcription and RNA processing	transcriptional regulation
ECs0296	1.15097	1.22157	0.682552	0.961579	1	putative Ogr family transcription activator	TF	Transcription and RNA processing	transcriptional regulation
ECs2864	0.751283	1.75773	0.657581	0.876534	1	putative regulator	TF	Transcription and RNA processing	transcriptional regulation
ECs2925	0.921614	1.97727	0.525163	0.626411	1	putative regulator	TF	Transcription and RNA processing	transcriptional regulation
ECs5325	0.96077	1.95249	0.63644	0.49375	1	putative regulator	TF	Transcription and RNA processing	transcriptional regulation
ECs1766	1.00361	1.64223	0.492456	0.902588	1	putative regulatory protein	TF	Transcription and RNA processing	transcriptional regulation
ECs2208	0.799417	1.90804	0.682197	0.654945	1	putative regulatory protein	TF	Transcription and RNA processing	transcriptional regulation
ECs0367	0.947202	1.98404	0.531176	0.587224	1	putative transcription factor	TF	Transcription and RNA processing	transcriptional regulation
ECs1588	1.1368	1.82808	0.531869	0.543457	1	putative transcriptional activator	TF	Transcription and RNA processing	transcriptional regulation
ECs4624	1.01084	1.94725	0.470439	0.621237	1	putative transcriptional regulator	TF	Transcription and RNA processing	transcriptional regulation
ECs2182	1.17557	1.16952	0.856455	0.804835	1	putative transcriptional regulator	TF	Transcription and RNA processing	transcriptional regulation
ECs3055	1.18416	1.45421	0.687777	0.695491	1	putative transcriptional regulator	TF	Transcription and RNA processing	transcriptional regulation
ECs4457	1.29899	1.37134	0.7119	0.632888	1	putative transcriptional regulator	TF	Transcription and RNA processing	transcriptional regulation
ECs0796	0.964961	1.92577	0.570787	0.584216	1	putative transcriptional regulator LYSR-type	TF	Transcription and RNA processing	transcriptional regulation
ECs1178	1.2016	1.29058	0.70753	0.816194	1	regulatory protein cIII	TF	Transcription and RNA processing	transcriptional regulation
ECs0207	0.701253	1.26698	0.949824	1.09968	1	transcriptional regulator for nitrite reductase (cytochrome c552)	TF	Transcription and RNA processing	transcriptional regulation
ECs0396	0.820208	1.54948	1.20739	0.432606	1	galactoside permease	transport	Transport
ECs4297	1.2454	1.17842	0.778588	0.805958	1	integral membrane protein of sn-glycerol 3-phosphate transport system	transport	Transport		ABC transporters
ECs4646	0.573549	1.61405	1.49217	0.325007	1	low affinity tryptophan permease	transport	Transport
ECs4285	0.903306	2.00554	0.658005	0.478576	1	low-affinity gluconate transport permease protein	transport	Transport
ECs5102	0.526431	1.81337	1.29602	0.384818	1	melibiose permease II	transport	Transport
ECs0798	0.972324	1.97399	0.538273	0.56375	1	putative membrane pump protein	transport	Transport
ECs3760	0.878898	1.97866	0.644297	0.544187	1	putative permease	transport	Transport
ECs4458	0.942704	1.95487	0.578215	0.570978	1	putative permease	transport	Transport
ECs4799	0.97541	1.96045	0.533846	0.578393	1	putative permease	transport	Transport
ECs3540	0.542375	1.77832	1.34067	0.355788	1	ATP-binding component of glycine betaine / proline transport system	transport	Transport		ABC transporters
ECs1292	0.919715	2.16171	0.459807	0.517241	1	putative ATP binding protein of ABC transporter	transport	Stress response
ECs3413	1.08666	1.72078	0.533211	0.698061	1	putative ATP-binding component of a transport system	transport	Transport
ECs2101	0.807527	2.10006	0.657183	0.48585	1	putative ATP-binding component of a transport system	transport	Transport		ABC transporters
ECs4141	1.1573	1.27911	0.741164	0.837673	1	putative periplasmic binding transport protein	transport	Transport		ABC transporters
ECs0043	0.984789	1.99117	0.524174	0.548983	1	putative carnitine transporter	transport	Transport
ECs3788	1.0294	1.99958	0.457967	0.564286	1	ATPase component of two convergent arginine trasnporter	transport	Transport
ECs0360	0.643414	1.1657	1.53583	0.643988	1	high-affinity choline transport	transport	Transport
ECs1694	1.05182	1.95952	0.526232	0.508744	1	molybdenum transport protein	transport	Transport
ECs2851	1.07627	1.90884	0.464739	0.597357	1	probable export protein	transport	Transport
ECs4221	1.04712	1.92135	0.489339	0.589375	1	putative amino acid/amine transport protein	transport	Transport
ECs4729	1.0747	1.50973	0.508434	0.941775	1	putative amino acid/amine transport protein	transport	Transport
ECs3252	0.90201	2.01297	0.616284	0.516363	1	putative receptor protein	transport	Transport
ECs4233	0.955393	1.93962	0.562558	0.589184	1	putative transport portein	transport	Transport
ECs0758	1.02761	1.83066	0.525242	0.660123	1	putative transport protein	transport	Transport
ECs3543	0.735887	1.3938	0.945205	0.94545	1	putative transport protein	transport	Transport
ECs2404	1.16789	1.42101	0.893598	0.528983	1	putative transport protein	transport	Transport
ECs1252	0.868853	1.67129	1.04622	0.432817	1	putative transport protein	transport	Transport
ECs0940	0.973066	1.906	0.575265	0.590443	1	putative transport protein	transport	Transport		Ascorbate and aldarate metabolism
ECs0572	0.973204	1.98958	0.591237	0.492201	1	putative transport protein	transport	Transport
ECs4222	0.936583	2.00657	0.594736	0.509633	1	putative transport protein	transport	Transport
ECs0346	0.94153	2.04166	0.604341	0.460323	1	putative transporter	transport	Transport
ECs5280	0.844105	1.92085	0.662705	0.616953	1	gluconate transport system permease 3	transport	Transport
ECs4137	0.96548	1.95696	0.587447	0.535864	1	transmembrane protein affects septum formation and cell membrane permeability	transport	Transport
ECs3960	1.03081	1.65176	0.523868	0.832454	1	putative oxidoreductase		Other category
ECs5226	0.72742	1.36718	1.03751	0.883391	1	putative oxidoreductase		Other category
ECs0306	1.28374	1.38309	0.483223	0.876627	1	putative oxidoreductase		Other category
ECs0342	0.425143	2.49433	0.433839	0.72893	1	putative oxidoreductase		Other category
ECs2053	0.871533	1.48487	1.17286	0.478932	1	putative oxidoreductase		Other category
ECs2381	0.855791	1.60761	1.18567	0.362189	1	putative oxidoreductase Fe-S subunit		Other category
ECs0369	0.951743	2.0095	0.570787	0.516284	1	putative oxidoreductase subunit		Other category
ECs3944	0.899684	1.97659	0.548846	0.624807	1	L-tartrate dehydratase subunit A		Other category		Glyoxylate and dicarboxylate metabolism
ECs3945	1.0117	1.86339	0.528112	0.641606	1	L-tartrate dehydratase subunit B		Other category		Glyoxylate and dicarboxylate metabolism
ECs1256	0.888779	1.65647	0.969138	0.507504	1	hypothetical protein		Nucleotide metabolism and DNA recombination		Pyrimidine metabolism
ECs0578	1.15159	1.30256	0.636823	0.929992	1	allantoate amidohydrohydrolase		Nucleotide metabolism and DNA recombination		Purine metabolism
ECs0577	1.15797	1.16788	0.821859	0.860758	1	hypothetical protein		Nucleotide metabolism and DNA recombination		Purine metabolism
ECs2708	0.959136	1.57631	1.32507	0.140447	1	hypothetical protein		Nucleotide metabolism and DNA recombination		Purine metabolism
ECs3054	0.977385	2.06364	0.494123	0.51751	1	hypothetical protein		Nucleotide metabolism and DNA recombination		Purine metabolism
ECs3740	0.913428	1.98887	0.644297	0.498759	1	putative dehydrogenase		Nucleotide metabolism and DNA recombination		Purine metabolism
ECs3057	0.989128	2.03347	0.459807	0.570749	1	hypothetical protein		Nucleotide metabolism and DNA recombination		Pyrimidine metabolism
ECs1257	0.917645	1.89025	0.636975	0.598111	1	putative synthetase		Nucleotide metabolism and DNA recombination		Pyrimidine metabolism
ECs0331	0.872242	2.06442	0.648899	0.462715	1	putative NADH-dependent flavin oxidoreductase		Other category
ECs0402	0.962905	2.12548	0.429531	0.539834	1	3-(3-hydroxyphenyl)propionate hydroxylase		Amino acid and protein metabolism		Phenylalanine metabolism
ECs2862	0.823876	1.95696	0.530598	0.740948	1	putative glycosyl transferase		Other category
ECs0569	1.06357	2.14165	0.425236	0.425119	1	hydroxypyruvate isomerase		Other category		Glyoxylate and dicarboxylate metabolism
ECs2359	0.55644	2.18832	0.8894	0.414785	1	N-ethylmaleimide reductase		Other category		Nitrotoluene degradation
ECs0404	0.941972	2.05667	0.441203	0.616114	1	2-hydroxy-6-ketonona-2,4-dienedioic acid hydrolase		Amino acid and protein metabolism		Phenylalanine metabolism
ECs2583	0.986214	1.37816	1.14687	0.492178	1	putative cytochrome C-type protein		Other category
ECs3318	1.18175	1.84824	0.458167	0.554829	1	detox protein		Other category
ECs0284	0.78517	2.03712	0.574643	0.656554	1	DNA-invertase		Nucleotide metabolism and DNA recombination
ECs1610	1.13887	1.85295	0.565403	0.481994	1	excisionase		Nucleotide metabolism and DNA recombination
ECs1286	0.968991	1.9792	0.558161	0.541277	1	putative (3R)-hydroxymyristol-(acyl carrier protein) dehydratase		Other category
ECs4332	0.995155	1.55398	0.467963	1.02284	1	putative (3R)-hydroxymyristoyl-[acyl carrier protein] dehydratase		Other category
ECs0047	1.04447	1.89025	0.497866	0.613447	1	putative ferredoxin		Other category
ECs2866	0.695145	1.71234	0.58474	1.05472	1	probable protein-tyrosine-phosphatase		Amino acid and protein metabolism
ECs3157	0.970739	1.81768	0.531482	0.724679	1	putative sulfatase / phosphatase		Other category
ECs2401	1.02888	1.89307	0.519284	0.604291	1	putative enzyme		Other category		Propanoate metabolism
ECs0385	0.989048	1.71399	1.1963	0.11052	1	putative phosphonomutase 2		Other category		Propanoate metabolism
ECs2405	1.05304	1.52343	0.956877	0.48104	1	putative flavoprotein		Other category
ECs0403	1.03662	1.84477	0.494123	0.669718	1	2,3-dihydroxyphenylpropionate 1,2-dioxygenase		Amino acid and protein metabolism		Phenylalanine metabolism
ECs1612	0.807405	1.91138	0.67231	0.653836	1	replication protein P		Nucleotide metabolism and DNA recombination
ECs2361	0.670675	1.31299	1.0081	1.02528	1	RNase T		Nucleotide metabolism and DNA recombination
ECs2103	0.923824	1.61982	1.21756	0.246987	1	putative sulfatase		Other category
ECs2859	0.590874	1.76738	0.700673	0.986883	1	putative transferase		Other category
ECs3984	0.924846	1.44645	1.16201	0.472909	1	putative transferase		Other category
ECs2863	0.948848	1.7302	0.53613	0.827482	1	putative transferase		Other category
ECs4645	0.364986	1.96021	1.46842	0.227234	1	tryptophanase		Amino acid and protein metabolism		Tryptophan metabolism
ECs1877	0.766865	1.59268	1.07016	0.589101	1	aldehyde dehydrogenase		Amino acid and protein metabolism		Arginine and proline metabolism
ECs2021	1.21981	1.44802	0.792778	0.554916	1	aldehyde dehydrogenase		Other category		Pyruvate metabolism
ECs1620	0.955393	1.90858	0.548133	0.634506	1	antitermination protein		Transcription and RNA processing	transcriptional regulation
ECs0039	1.00531	1.92766	0.543626	0.569356	1	carnitine racemase		Other category
ECs4560	0.8465	1.99964	0.666231	0.534091	1	CesT protein		Other category
ECs5213	1.24925	1.26884	0.713713	0.781916	1	cytochrome b(562)		Other category
ECs3530	0.710791	2.22692	0.648047	0.471333	1	DNA-binding protein		Nucleotide metabolism and DNA recombination
ECs0046	1.01576	1.75234	0.510575	0.763915	1	flavoprotein		Other category
ECs0568	0.858534	2.05261	0.520394	0.622885	1	glyoxylate carboligase		Other category		Glyoxylate and dicarboxylate metabolism
ECs3350	1.03403	1.55945	0.531545	0.910969	1	hydrogenase 4 Fe-S subunit		Other category
ECs3659	1.31305	1.13661	0.706079	0.853064	1	L-1,2-propanediol oxidoreductase		Other category		Glyoxylate and dicarboxylate metabolism
ECs0041	0.943999	1.71017	0.526112	0.862456	1	l-carnitine dehydratase		Other category
ECs4188	1.2518	1.40619	0.69345	0.666792	1	leader peptidase HopD		Amino acid and protein metabolism
ECs3404	0.941434	1.93542	0.583514	0.585669	1	phenylpropionate dioxygenase large terminal subunit		Amino acid and protein metabolism		Phenylalanine metabolism
ECs1875	0.737314	1.29819	1.2068	0.763083	1	probable amidotransferase subunit		Amino acid and protein metabolism		Arginine and proline metabolism
ECs0040	0.918754	1.77011	0.518443	0.83808	1	probable crotonobetaine/carnitine-CoA ligase		Other category
ECs3592	0.965224	1.9278	0.588828	0.563071	1	putative 4-hydroxybenzoate decarboxylase		Other category		Aminobenzoate degradation
ECs1287	0.936037	1.8734	0.516713	0.72156	1	putative acyl carrier protein		Other category
ECs5158	0.913168	1.92805	0.544724	0.662523	1	putative alpha helical protein		Nucleotide metabolism and DNA recombination
ECs2809	1.18476	1.15272	0.779458	0.892389	1	putative alpha helix protein		Nucleotide metabolism and DNA recombination
ECs4453	0.675187	1.49364	1.09214	0.756743	1	putative ATP-binding protein		Other category
ECs1316	1.15059	1.24559	0.789362	0.826723	1	putative diacylglycerol kinase		Other category		Glycerolipid metabolism
ECs3513	0.720127	2.06627	0.730874	0.531399	1	putative DNA binding protein		Nucleotide metabolism and DNA recombination
ECs0299	0.964692	1.89539	0.60485	0.578393	1	putative DNA binding protein		Nucleotide metabolism and DNA recombination
ECs2981	0.864453	2.11557	0.520579	0.555315	1	putative DNA methylase		Nucleotide metabolism and DNA recombination
ECs3254	0.847131	1.90041	0.727432	0.565955	1	putative enzyme		Other category
ECs2102	0.989421	1.42008	1.21465	0.377071	1	putative enzyme		Other category
ECs5174	0.685859	1.81151	0.914377	0.622476	1	putative epimerase/aldolase		Other category		Ascorbate and aldarate metabolism
ECs1874	0.730352	1.35279	1.19963	0.724591	1	putative glutamine synthetase		Amino acid and protein metabolism		Arginine and proline metabolism
ECs4827	0.993504	1.89526	0.581578	0.573275	1	putative glycoprotein		Other category
ECs4800	1.0001	1.89612	0.580869	0.566406	1	putative glycosidase		Other category
ECs5173	0.674906	1.59263	0.917744	0.843301	1	putative hexulose-6-phosphate isomerase		Other category		Ascorbate and aldarate metabolism
ECs1284	0.782614	1.69371	1.03685	0.509446	1	putative holo-[acyl-carrier protein] synthase		Other category		Pantothenate and CoA biosynthesis
ECs3593	1.01725	2.03357	0.531014	0.467164	1	putative phenylacrylic acid decarboxylase		Other category		Aminobenzoate degradation
ECs1611	0.708631	2.04627	0.674978	0.621237	1	putative replication protein		Nucleotide metabolism and DNA recombination
ECs1311	0.762418	1.37724	0.956054	0.922941	1	putative transposase		Nucleotide metabolism and DNA recombination
ECs3956	1.25854	1.49034	0.583016	0.693585	1	putative tRNA synthetase		Nucleotide metabolism and DNA recombination
ECs0570	0.94712	1.93156	0.506988	0.66373	1	tartronic semialdehyde reductase		Other category		Glyoxylate and dicarboxylate metabolism
ECs4913	1.01875	1.87851	0.626523	0.516565	1	thiamin biosynthesis protein ThiH		Other category		Thiamine metabolism
ECs3591	0.968645	1.90884	0.602048	0.56417	1	hypothetical protein		Other category		Aminobenzoate degradation
ECs3750	1.22908	1.31633	0.75168	0.71664	1	hypothetical protein		Other category		Folate biosynthesis
ECs4004	1.15948	1.26564	0.663906	0.929453	1	hypothetical protein		Other category		Ascorbate and aldarate metabolism
ECs5169	0.677535	1.42638	0.98964	0.927164	1	hypothetical protein		Other category		Ascorbate and aldarate metabolism
ECs5170	0.703963	1.39419	1.09493	0.821062	1	hypothetical protein		Other category		Ascorbate and aldarate metabolism
ECs1362	0.728532	1.77968	0.914486	0.60949	1	hypotheical protein		Unknown
ECs0366	1.04546	2.03985	0.412228	0.556464	1	hypothetical protein		Unknown
ECs0581	1.05458	1.89918	0.487028	0.605719	1	hypothetical protein		Unknown
ECs0826	1.01293	1.88124	0.497029	0.655512	1	hypothetical protein		Unknown
ECs0830	1.02805	1.9342	0.509444	0.575404	1	hypothetical protein		Unknown
ECs1111	0.992423	1.77302	0.49446	0.784642	1	hypothetical protein		Unknown
ECs1298	1.04083	1.8257	0.440008	0.740625	1	hypothetical protein		Unknown
ECs1397	0.984789	1.69572	0.525446	0.835301	1	hypothetical protein		Unknown
ECs1490	1.12208	1.78697	0.62718	0.498798	1	hypothetical protein		Unknown
ECs1599	1.03912	1.46983	0.513216	1.01219	1	hypothetical protein		Unknown
ECs1783	1.00871	1.94195	0.469428	0.629653	1	hypothetical protein		Unknown
ECs2187	1.02301	1.96423	0.437335	0.626871	1	hypothetical protein		Unknown
ECs2260	1.01332	1.93454	0.467972	0.633657	1	hypothetical protein		Unknown
ECs2456	1.10607	1.57738	0.533211	0.817728	1	hypothetical protein		Unknown
ECs2729	0.99994	1.75938	0.490657	0.794178	1	hypothetical protein		Unknown
ECs2740	1.03091	1.84442	0.436631	0.736137	1	hypothetical protein		Unknown
ECs2742	1.00442	1.77945	0.496252	0.764184	1	hypothetical protein		Unknown
ECs2952	1.14028	1.56128	0.529002	0.802647	1	hypothetical protein		Unknown
ECs2955	1.06509	1.74909	0.530923	0.695065	1	hypothetical protein		Unknown
ECs2977	1.02033	1.93359	0.459626	0.63611	1	hypothetical protein		Unknown
ECs3323	1.08446	1.68362	0.50083	0.77041	1	hypothetical protein		Unknown
ECs3946	1.03024	1.62076	0.535262	0.851276	1	hypothetical protein		Unknown
ECs4235	1.08796	1.78223	0.515438	0.655512	1	hypothetical protein		Unknown
ECs4236	1.00516	1.74945	0.47989	0.80975	1	hypothetical protein		Unknown
ECs4815	1.14789	1.70003	0.518679	0.670548	1	hypothetical protein		Unknown
ECs5066	1.03403	1.92332	0.531545	0.556703	1	hypothetical protein		Unknown
ECs0262	0.728147	1.72642	1.0543	0.515296	1	hypothetical protein		Unknown
ECs0356	0.666989	1.23265	1.28141	0.821042	1	hypothetical protein		Unknown
ECs0876	0.756145	1.59651	0.911674	0.762379	1	hypothetical protein		Unknown
ECs1172	0.743237	1.72619	0.838802	0.72572	1	hypothetical protein		Unknown
ECs1338	0.71621	1.5332	1.07383	0.69524	1	hypothetical protein		Unknown
ECs1408	0.741631	1.64288	0.859063	0.787257	1	hypothetical protein		Unknown
ECs1829	0.610275	1.55607	0.798027	1.07071	1	hypothetical protein		Unknown
ECs2004	0.744317	1.49296	0.915876	0.870952	1	hypothetical protein		Unknown
ECs2005	0.748695	1.53588	0.943485	0.795759	1	hypothetical protein		Unknown
ECs2210	0.711726	1.82262	0.836779	0.666342	1	hypothetical protein		Unknown
ECs2278	0.673956	1.31258	1.15175	0.871855	1	hypothetical protein		Unknown
ECs2806	0.73767	1.74441	0.883194	0.66721	1	hypothetical protein		Unknown
ECs2870	0.731498	1.52339	0.693118	1.08781	1	hypothetical protein		Unknown
ECs2912	0.760339	1.65072	0.746176	0.878628	1	hypothetical protein		Unknown
ECs3735	0.723881	1.43463	1.18545	0.666424	1	hypothetical protein		Unknown
ECs0281	0.820208	1.89128	0.677836	0.654456	1	hypothetical protein		Unknown
ECs0301	0.766373	1.84464	0.812265	0.614402	1	hypothetical protein		Unknown
ECs0310	0.728474	2.0223	0.675188	0.623952	1	hypothetical protein		Unknown
ECs0349	0.735309	2.10699	0.68725	0.521839	1	hypothetical protein		Unknown
ECs0442	0.880805	1.89846	0.732338	0.528098	1	hypothetical protein		Unknown
ECs0766	0.79019	1.97966	0.706026	0.569735	1	hypothetical protein		Unknown
ECs1281	0.804774	1.95258	0.872919	0.406326	1	hypothetical protein		Unknown
ECs1304	0.787831	2.06739	0.740021	0.451147	1	hypothetical protein		Unknown
ECs1313	0.787831	2.06861	0.703771	0.487927	1	hypothetical protein		Unknown
ECs1387	0.791717	1.96903	0.691169	0.594083	1	hypothetical protein		Unknown
ECs1579	0.820098	2.00121	0.712465	0.511276	1	hypothetical protein		Unknown
ECs1594	0.837309	2.02905	0.634959	0.547657	1	hypothetical protein		Unknown
ECs1627	0.835201	2.00031	0.648375	0.56375	1	hypothetical protein		Unknown
ECs1931	0.824353	1.92229	0.686112	0.611335	1	hypothetical protein		Unknown
ECs2059	0.740244	2.06532	0.80429	0.434765	1	hypothetical protein		Unknown
ECs2073	0.850117	1.92821	0.75168	0.51042	1	hypothetical protein		Unknown
ECs2105	0.866615	1.96838	0.850472	0.350892	1	hypothetical protein		Unknown
ECs2358	0.770539	1.89537	0.942113	0.42474	1	hypothetical protein		Unknown
ECs3489	0.820302	1.92141	0.805022	0.491822	1	hypothetical protein		Unknown
ECs3518	0.78432	2.03293	0.689292	0.541438	1	hypothetical protein		Unknown
ECs4362	0.817999	1.83123	0.871082	0.512802	1	hypothetical protein		Unknown
ECs5065	0.875368	2.01132	0.757996	0.396936	1	hypothetical protein		Unknown
ECs5268	0.846524	1.95416	0.675681	0.568449	1	hypothetical protein		Unknown
ECs5305	0.853734	1.91324	0.749638	0.523413	1	hypothetical protein		Unknown
ECs5257	0.838989	1.84704	0.512091	0.851815	1	hypothetical protein		Unknown
ECs0317	0.823222	1.96556	0.581377	0.680064	1	hypothetical protein		Unknown
ECs0797	0.848434	2.01529	0.594736	0.591741	1	hypothetical protein		Unknown
ECs0824	0.833966	2.04181	0.539816	0.638317	1	hypothetical protein		Unknown
ECs0831	0.823297	2.07258	0.584218	0.572814	1	hypothetical protein		Unknown
ECs1293	0.797804	2.07927	0.56274	0.615	1	hypothetical protein		Unknown
ECs1295	0.853484	2.11392	0.483223	0.607313	1	hypothetical protein		Unknown
ECs1296	0.824475	2.09539	0.509444	0.627713	1	hypothetical protein		Unknown
ECs1297	0.781579	2.01326	0.552255	0.706925	1	hypothetical protein		Unknown
ECs1314	0.774737	2.26934	0.578261	0.4374	1	hypothetical protein		Unknown
ECs1401	0.823778	2.07136	0.514458	0.646569	1	hypothetical protein		Unknown
ECs1930	0.820236	1.97771	0.61614	0.634894	1	hypothetical protein		Unknown
ECs1950	0.768616	2.1807	0.542152	0.567813	1	hypothetical protein		Unknown
ECs1951	0.839967	2.171	0.483223	0.565634	1	hypothetical protein		Unknown
ECs3519	0.859452	2.08872	0.597439	0.506094	1	hypothetical protein		Unknown
ECs3529	0.727662	2.13246	0.628299	0.566642	1	hypothetical protein		Unknown
ECs3713	0.794667	2.14693	0.586995	0.526953	1	hypothetical protein		Unknown
ECs3868	0.872242	1.9456	0.593674	0.636232	1	hypothetical protein		Unknown
ECs4570	0.797149	2.0055	0.563866	0.686319	1	hypothetical protein		Unknown
ECs4591	0.8465	2.1589	0.55108	0.499633	1	hypothetical protein		Unknown
ECs4593	0.8104	2.20922	0.503357	0.537725	1	hypothetical protein		Unknown
ECs4828	0.870095	2.00412	0.605484	0.569102	1	hypothetical protein		Unknown
ECs0123	1.21064	1.08188	0.72635	0.990382	1	hypothetical protein		Unknown
ECs0244	1.21316	1.28072	0.615432	0.91037	1	hypothetical protein		Unknown
ECs0290	1.23636	1.27852	0.655049	0.847171	1	hypothetical protein		Unknown
ECs0732	1.20764	1.17501	0.745299	0.882945	1	hypothetical protein		Unknown
ECs0880	1.2322	1.4077	0.920918	0.447223	1	hypothetical protein		Unknown
ECs0881	1.15998	1.61541	0.809561	0.435854	1	hypothetical protein		Unknown
ECs0884	1.3816	1.72215	0.513322	0.414414	1	hypothetical protein		Unknown
ECs1076	1.2021	1.12966	0.745081	0.933022	1	hypothetical protein		Unknown
ECs1173	1.20051	1.26736	0.867829	0.672038	1	hypothetical protein		Unknown
ECs1229	1.1493	1.41819	0.818391	0.629598	1	hypothetical protein		Unknown
ECs1394	1.29775	1.36257	0.646319	0.71139	1	hypothetical protein		Unknown
ECs1434	1.21843	1.28596	0.716281	0.794236	1	hypothetical protein		Unknown
ECs1529	1.1975	1.29746	0.835009	0.68019	1	hypothetical protein		Unknown
ECs1676	1.15883	1.25563	0.67678	0.92639	1	hypothetical protein		Unknown
ECs1936	1.32876	1.70528	0.753332	0.233774	1	hypothetical protein		Unknown
ECs2155	1.17689	1.29652	0.709124	0.834137	1	hypothetical protein		Unknown
ECs2357	1.19787	1.26806	0.791242	0.754279	1	hypothetical protein		Unknown
ECs2511	1.15202	1.42635	0.922161	0.510186	1	hypothetical protein		Unknown
ECs2638	1.27863	1.1254	0.80475	0.796015	1	hypothetical protein		Unknown
ECs2758	1.28517	1.56949	0.458968	0.719083	1	hypothetical protein		Unknown
ECs3611	1.1558	1.28242	0.93751	0.630345	1	hypothetical protein		Unknown
ECs3614	1.15657	1.43646	0.747785	0.678288	1	hypothetical protein		Unknown
ECs4111	1.24265	1.52962	0.902163	0.337432	1	hypothetical protein		Unknown
ECs4445	1.20155	1.37297	0.770476	0.670114	1	hypothetical protein		Unknown
ECs4553	1.33439	1.36958	0.687838	0.623418	1	hypothetical protein		Unknown
ECs5109	1.29445	1.35394	0.896921	0.460721	1	hypothetical protein		Unknown
ECs5294	1.20125	1.20227	0.880327	0.72156	1	hypothetical protein		Unknown
ECs5309	1.15394	1.17444	0.766333	0.916673	1	hypothetical protein		Unknown
ECs5314	1.17484	1.43482	0.685743	0.726092	1	hypothetical protein		Unknown
ECs5328	1.18845	1.26825	0.700799	0.858505	1	hypothetical protein		Unknown
ECs1616	0.619464	1.57622	1.35614	0.457117	1	hypothetical protein		Unknown
ECs2212	0.607636	1.57051	1.31601	0.516862	1	hypothetical protein		Unknown
ECs5009	0.41506	1.14091	1.78046	0.64662	1	hypothetical protein		Unknown
ECs0340	0.410329	2.52276	0.345159	0.809349	1	hypothetical protein		Unknown
ECs3528	0.635567	2.02007	0.827191	0.562424	1	hypothetical protein		Unknown
ECs0260	0.941042	1.37523	1.17538	0.51159	1	hypothetical protein		Unknown
ECs0912	0.970236	1.70029	0.856947	0.498615	1	hypothetical protein		Unknown
ECs1618	0.823107	1.7379	1.03857	0.423004	1	hypothetical protein		Unknown
ECs2436	0.88936	1.76561	0.876656	0.497499	1	hypothetical protein		Unknown
ECs3706	0.861478	1.59815	1.06181	0.495289	1	hypothetical protein		Unknown
ECs3953	1.04495	1.53104	0.944693	0.494703	1	hypothetical protein		Unknown
ECs4288	0.973216	1.48251	1.08627	0.467405	1	hypothetical protein		Unknown
ECs4479	0.78031	1.82618	1.04256	0.376853	1	hypothetical protein		Unknown
ECs4812	0.930828	1.75171	0.860534	0.485296	1	hypothetical protein		Unknown
ECs5048	1.01463	1.60041	0.972303	0.429413	1	hypothetical protein		Unknown
ECs5110	0.925072	1.40299	1.21045	0.464245	1	hypothetical protein		Unknown
ECs5193	0.906096	1.42416	1.21799	0.455254	1	hypothetical protein		Unknown
ECs5284	0.909036	1.75298	0.915893	0.448477	1	hypothetical protein		Unknown
ECs0282	0.895263	2.05407	0.562296	0.539834	1	hypothetical protein		Unknown
ECs0351	0.930414	2.11754	0.450613	0.558877	1	hypothetical protein		Unknown
ECs0368	0.910788	2.13936	0.469257	0.538273	1	hypothetical protein		Unknown
ECs0950	0.922943	2.2199	0.504232	0.410743	1	hypothetical protein		Unknown
ECs1531	0.955069	2.02716	0.492368	0.577801	1	hypothetical protein		Unknown
ECs1581	0.897529	2.08804	0.505651	0.56375	1	hypothetical protein		Unknown
ECs1582	0.901735	2.07092	0.496807	0.585362	1	hypothetical protein		Unknown
ECs3496	0.95812	2.06259	0.428454	0.60711	1	hypothetical protein		Unknown
ECs3728	0.956701	2.01996	0.504523	0.570395	1	hypothetical protein		Unknown
ECs5161	0.959277	2.0254	0.520779	0.545428	1	hypothetical protein		Unknown
ECs5303	0.989892	2.0254	0.510764	0.52445	1	hypothetical protein		Unknown
ECs0606	0.964692	1.89539	0.552255	0.633478	1	hypothetical protein		Unknown
ECs0802	0.968645	1.90884	0.506988	0.66373	1	hypothetical protein		Unknown
ECs1026	0.907719	2.02503	0.453809	0.668924	1	hypothetical protein		Unknown
ECs1291	0.898404	2.00631	0.474745	0.674792	1	hypothetical protein		Unknown
ECs1512	0.899027	1.97312	0.592057	0.583604	1	hypothetical protein		Unknown
ECs1948	0.900379	1.90105	0.631148	0.611444	1	hypothetical protein		Unknown
ECs2117	0.902303	2.01885	0.568303	0.560596	1	hypothetical protein		Unknown
ECs2801	0.897302	1.95139	0.616412	0.581028	1	hypothetical protein		Unknown
ECs2957	0.950831	1.90514	0.571298	0.618282	1	hypothetical protein		Unknown
ECs4090	0.970517	1.90851	0.541583	0.625894	1	hypothetical protein		Unknown
ECs4234	0.91246	1.97354	0.567855	0.594732	1	hypothetical protein		Unknown
ECs4797	0.92193	1.92443	0.555192	0.646077	1	hypothetical protein		Unknown
ECs5160	0.91246	1.95005	0.524174	0.663355	1	hypothetical protein		Unknown
ECs5288	0.947627	1.98119	0.547045	0.572937	1	hypothetical protein		Unknown
ECs1513	0.987245	1.81482	0.723027	0.50988	1	hypothetical protein		Unknown
ECs1893	1.01388	1.7722	0.750321	0.495417	1	hypothetical protein		Unknown
ECs1949	0.942883	1.96867	0.596317	0.538398	1	hypothetical protein		Unknown
ECs3004	0.919973	1.89827	0.656608	0.567341	1	hypothetical protein		Unknown
ECs3008	0.967751	1.84184	0.729014	0.497338	1	hypothetical protein		Unknown
ECs3503	0.928336	1.9071	0.627882	0.580235	1	hypothetical protein		Unknown
ECs3504	0.937465	1.99838	0.592694	0.518833	1	hypothetical protein		Unknown
ECs4459	0.923785	1.91366	0.632894	0.573275	1	hypothetical protein		Unknown
ECs4551	1.02003	1.82976	0.683633	0.502898	1	hypothetical protein		Unknown
ECs4803	0.989457	1.8132	0.73285	0.498898	1	hypothetical protein		Unknown
ECs5270	0.97744	1.84652	0.699591	0.513648	1	hypothetical protein		Unknown
ECs5304	0.919137	1.9291	0.638928	0.556703	1	hypothetical protein		Unknown
ECs0013	0.956652	1.73471	0.530164	0.821318	1	hypothetical protein		Unknown
ECs2865	0.875368	1.70122	0.527152	0.940619	1	hypothetical protein		Unknown
ECs3324	0.882371	1.86303	0.463894	0.84214	1	hypothetical protein		Unknown
ECs5406	1.03283	1.96939	0.487151	0.559584	1	#N/A		Unknown
ECs5418	1.0041	1.87542	0.530598	0.635098	1	#N/A		Unknown
ECs5740	1.01725	1.74796	0.446052	0.834221	1	#N/A		Unknown
ECs5742	1.02744	1.85313	0.465084	0.70142	1	#N/A		Unknown
ECs5362	0.738015	1.18815	1.04114	1.043	1	#N/A		Unknown
ECs5708	0.847565	2.01962	0.673343	0.506094	1	#N/A		Unknown
ECs5739	0.765947	1.66972	0.5662	1.04286	1	#N/A		Unknown
ECs5715	0.866436	2.01798	0.587318	0.578393	1	#N/A		Unknown
ECs5771	0.75753	1.93932	0.613321	0.739676	1	#N/A		Unknown
ECs5377	1.18507	1.00586	0.767574	1.04751	1	#N/A		Unknown
ECs5716	1.16692	1.46332	0.518812	0.881316	1	#N/A		Unknown
ECs5738	0.894056	1.69145	0.495168	0.964422	1	#N/A		Unknown
ECs3600	0.742245	0.876132	1.12991	1.24947	2	2C-methyl-D-erythritol 2,4-cyclodiphosphate synthase	antibiotics biosynthesis	Stress response	antibiotics biosynthesis	Biosynthesis of antibiotics
ECs0782	0.911304	0.713997	0.878547	1.49682	2	3-deoxy-D-arabinoheptulosonate-7-phosphate synthase	antibiotics biosynthesis	Pathogenicity	antibiotics biosynthesis	Quorum sensing
ECs5346	0.880259	0.743426	0.809871	1.572	2	3-phosphoserine phosphatase	antibiotics biosynthesis	Stress response	antibiotics biosynthesis	Biosynthesis of antibiotics
ECs1713	0.968548	0.696207	0.726404	1.61464	2	4-diphosphocytidyl-2C-methyl-D-erythritol kinase	antibiotics biosynthesis	Stress response	antibiotics biosynthesis	Biosynthesis of antibiotics
ECs0187	0.800071	0.726444	1.02248	1.44828	2	acetylCoA carboxylase carboxytransferase alpha subunit	antibiotics biosynthesis	Stress response	antibiotics biosynthesis	Biosynthesis of antibiotics
ECs4886	0.76006	1.05121	1.06686	1.12674	2	acetylornithine deacetylase	antibiotics biosynthesis	Stress response	antibiotics biosynthesis	Biosynthesis of antibiotics
ECs0411	0.692632	0.909549	0.930362	1.47692	2	alcohol dehydrogenase class III	antibiotics biosynthesis	Stress response	antibiotics biosynthesis	Biosynthesis of antibiotics
ECs4889	0.646235	0.889028	1.29869	1.15882	2	argininosuccinate lyase	antibiotics biosynthesis	Stress response	antibiotics biosynthesis	Biosynthesis of antibiotics
ECs4052	0.761346	0.911912	1.01344	1.31698	2	argininosuccinate synthetase	antibiotics biosynthesis	Stress response	antibiotics biosynthesis	Biosynthesis of antibiotics
ECs3471	0.798802	0.669172	0.930013	1.60219	2	hypothetical protein	antibiotics biosynthesis	Unknown
ECs2523	0.792053	0.670482	0.98536	1.54988	2	L-serine deaminase	antibiotics biosynthesis	Stress response	antibiotics biosynthesis	Biosynthesis of antibiotics
ECs4887	0.703862	0.91116	1.08619	1.3006	2	N-acetyl-gamma-glutamylphosphate reductase	antibiotics biosynthesis	Stress response	antibiotics biosynthesis	Biosynthesis of antibiotics
ECs3675	0.679592	0.979121	1.19703	1.14329	2	N-acetylglutamate synthase	antibiotics biosynthesis	Stress response	antibiotics biosynthesis	Biosynthesis of antibiotics
ECs3380	0.868116	0.461677	0.522057	2.16023	2	nucleoside diphosphate kinase	antibiotics biosynthesis	Stress response	antibiotics biosynthesis	Biosynthesis of antibiotics
ECs1712	0.832932	0.635753	0.863469	1.66934	2	phosphoribosylpyrophosphate synthetase	antibiotics biosynthesis	Stress response	antibiotics biosynthesis	Biosynthesis of antibiotics
ECs2846	0.809713	0.626051	0.850614	1.71611	2	putative Galf transferase	antibiotics biosynthesis	Stress response	antibiotics biosynthesis	Biosynthesis of antibiotics
ECs4408	0.847151	0.68194	0.844376	1.62975	2	uptake of C4-dicarboxylic acids	two-component system	Stress response	two-component system	Two-component system
ECs3141	0.956517	0.481381	0.772648	1.78773	2	putative enzyme	two-component system	Pathogenicity	two-component system	Two-component system
ECs3200	0.800347	0.724383	0.903955	1.57414	2	acetylCoA carboxylase carboxytransferase component beta subunit	antibiotics biosynthesis	Stress response	antibiotics biosynthesis	Biosynthesis of antibiotics
ECs3810	0.840715	0.740807	0.868304	1.554	2	transketolase 1 isozyme	antibiotics biosynthesis	Stress response	antibiotics biosynthesis	Biosynthesis of antibiotics
ECs0418	0.968354	0.695904	0.863131	1.47194	2	putative transcription regulator	quorum sensing	Pathogenicity	quorum sensing	Quorum sensing
ECs1624	1.14028	0	0.508656	2.34401	2	lipoprotein Rz1 precursor	prophage	Stress response	prophage
ECs5095	0.878679	0.469749	0.607582	2.05194	2	2-component regulatory system regulatory protein BasR	CAMP resistance	Pathogenicity	two-component system	Cationic antimicrobial peptide (CAMP resistance
ECs3144	0.869331	0.648363	0.899794	1.58161	2	hypothetical protein	CAMP resistance	Stress response		Cationic antimicrobial peptide (CAMP resistance
ECs3145	0.834353	0.507139	0.666215	1.99969	2	hypothetical protein	CAMP resistance	Stress response		Cationic antimicrobial peptide (CAMP resistance
ECs5096	0.946944	0.402933	0.613215	2.04093	2	hypothetical protein	CAMP resistance	Stress response		Cationic antimicrobial peptide (CAMP resistance
ECs3142	0.935055	0.547601	0.590872	1.9357	2	putative sugar transferase	CAMP resistance	Stress response		Cationic antimicrobial peptide (CAMP resistance
ECs5094	0.924149	0.607069	0.547275	1.93467	2	sensor protein BasS for basR	CAMP resistance	Stress response	two-component system	Cationic antimicrobial peptide (CAMP resistance
ECs2303	0.766019	0.727105	0.491652	2.03859	2	acid shock protein	acid shock protein	Stress response
ECs4102	0.719822	0.873649	1.3104	1.0859	2	stringent starvation protein A	stress response	Stress response
ECs4101	0.746787	0.924789	1.2457	1.07615	2	stringent starvation protein B	stress response	Stress response
ECs3140	1.04581	0.403595	0.77725	1.76687	2	aluminum-inducible protein	stress response	Stress response
ECs5334	0.754086	1.00462	1.06703	1.17806	2	hyperosmotically inducible periplasmic protein	stress response	Other category
ECs3203	0.921546	0.743959	0.900834	1.43378	2	putative PTS system enzyme II A component	carbohydrate metabolism	Carbohydrate metabolism
ECs5340	0.767054	0.696197	1.04694	1.48605	2	2-deoxyribose-5-phosphate aldolase	carbohydrate metabolism	Carbohydrate metabolism		Pentose phosphate pathway
ECs4268	0.777893	0.7284	0.904079	1.59318	2	protein of glp regulon	regulon	Transcription and RNA processing	transcriptional regulation	Sulfur metabolism
ECs4123	0.842791	0.698054	0.925813	1.53326	2	regulator of ftsI	TF	Transcription and RNA processing	transcriptional regulation
ECs2328	0.935767	0.720604	0.842823	1.50266	2	repressor of malX and Y genes	TF	Transcription and RNA processing	transcriptional regulation
ECs4186	0.770841	0.671284	0.866315	1.69558	2	30S ribosomal subunit protein S10	30S ribosome	Transcription and RNA processing	ribosome	Ribosome
ECs4162	0.756424	0.671111	1.14945	1.41403	2	30S ribosomal subunit protein S11	30S ribosome	Transcription and RNA processing	ribosome	Ribosome
ECs4193	0.743502	0.758479	1.04117	1.45566	2	30S ribosomal subunit protein S12	30S ribosome	Transcription and RNA processing	ribosome	Ribosome
ECs3472	0.807611	0.697188	0.921102	1.57519	2	30S ribosomal subunit protein S16	30S ribosome	Transcription and RNA processing	ribosome	Ribosome
ECs4176	0.730312	0.972362	0.976731	1.32847	2	30S ribosomal subunit protein S17	30S ribosome	Transcription and RNA processing	ribosome	Ribosome
ECs0026	0.816366	0.560469	0.982742	1.63475	2	30S ribosomal subunit protein S20	30S ribosome	Transcription and RNA processing	ribosome	Ribosome
ECs3948	0.807592	0.612925	1.10074	1.46911	2	30S ribosomal subunit protein S21	30S ribosome	Transcription and RNA processing	ribosome	Ribosome
ECs4179	0.720865	0.743314	0.994903	1.54215	2	30S ribosomal subunit protein S3	30S ribosome	Transcription and RNA processing	ribosome	Ribosome
ECs5176	0.731575	0.691609	0.94067	1.63828	2	30S ribosomal subunit protein S6	30S ribosome	Transcription and RNA processing	ribosome	Ribosome
ECs4103	0.744945	0.752897	1.11258	1.38482	2	30S ribosomal subunit protein S9	30S ribosome	Transcription and RNA processing	ribosome	Ribosome
ECs4178	0.742897	0.720053	0.917304	1.62342	2	50S ribosomal subunit protein L16	50S ribosome	Transcription and RNA processing	ribosome	Ribosome
ECs4169	0.702491	0.766788	1.15219	1.37345	2	50S ribosomal subunit protein L18	50S ribosome	Transcription and RNA processing	ribosome	Ribosome
ECs4182	0.692843	0.781361	0.973905	1.5559	2	50S ribosomal subunit protein L2	50S ribosome	Transcription and RNA processing	ribosome	Ribosome
ECs4180	0.714067	0.801833	0.953466	1.53556	2	50S ribosomal subunit protein L22	50S ribosome	Transcription and RNA processing	ribosome	Ribosome
ECs4174	0.748398	0.892712	0.961722	1.40315	2	50S ribosomal subunit protein L24	50S ribosome	Transcription and RNA processing	ribosome	Ribosome
ECs4512	0.821864	0.712951	0.91662	1.54989	2	50S ribosomal subunit protein L28	50S ribosome	Transcription and RNA processing	ribosome	Ribosome
ECs4185	0.709163	0.745249	1.01135	1.53507	2	50S ribosomal subunit protein L3	50S ribosome	Transcription and RNA processing	ribosome	Ribosome
ECs4167	0.728481	0.805792	1.06429	1.40082	2	50S ribosomal subunit protein L30	50S ribosome	Transcription and RNA processing	ribosome	Ribosome
ECs1467	0.801631	0.665741	0.89094	1.64354	2	50S ribosomal subunit protein L32	50S ribosome	Transcription and RNA processing	ribosome	Ribosome
ECs4184	0.67289	0.731615	1.13728	1.45373	2	50S ribosomal subunit protein L4, regulates expression of S10 operon	50S ribosome	Transcription and RNA processing	ribosome	Ribosome
ECs4173	0.727201	0.8788	1.0167	1.3809	2	50S ribosomal subunit protein L5	50S ribosome	Transcription and RNA processing	ribosome	Ribosome
ECs4170	0.68629	0.798515	1.06484	1.45069	2	50S ribosomal subunit protein L6	50S ribosome	Transcription and RNA processing	ribosome	Ribosome
ECs5179	0.681325	0.786099	1.28411	1.23824	2	50S ribosomal subunit protein L9	50S ribosome	Transcription and RNA processing	ribosome	Ribosome
ECs4048	0.745121	1.04126	1.1534	1.06114	2	ribosome-binding factor A	ribosome	Transcription and RNA processing	ribosome
ECs0943	0.753203	1.06559	0.929911	1.26321	2	arginine 3rd transport system periplasmic binding protein	transport	Transport		ABC transporters
ECs4691	0.740367	0.747338	0.923647	1.59281	2	ATP-binding component of D-ribose high-affinity transport system	transport	Transport		ABC transporters
ECs0945	0.757188	0.900923	1.27461	1.05843	2	arginine 3rd transport system permease protein	transport	Transport		ABC transporters
ECs3048	0.878735	0.718293	0.859663	1.54589	2	lysine-specific permease	transport	Transport
ECs3272	1.02486	0.689209	0.717168	1.57326	2	permease of transport system for 3 nucleosides	transport	Transport
ECs3656	0.861249	0.453779	0.488034	2.21061	2	probable serine transporter	transport	Transport
ECs3198	0.885577	0.730582	0.945822	1.43665	2	putative lipoprotein	transport	Transport
ECs0983	0.836231	0.598943	0.837806	1.72867	2	putative transport	transport	Transport
ECs2369	0.966407	0.584044	0.725049	1.72747	2	putative transport protein	transport	Transport
ECs5316	0.938062	0.729699	0.71709	1.62313	2	putative transport protein	transport	Transport
ECs4135	0.898345	0.563658	0.307732	2.25434	2	putative transport protein	transport	Transport
ECs3840	0.831143	0.564668	0.93373	1.6668	2	transport of nucleosides, permease protein	transport	Transport
ECs4318	1.05605	0.735021	0.74289	1.46965	2	zinc-transporting ATPase	transport	Transport
ECs2056	0.766291	0.747456	1.15575	1.32297	2	putative receptor	transport	Transport
ECs0063	0.751748	0.925884	0.914803	1.41655	2	probable ATP-dependent RNA helicase	transport	Transport
ECs4681	0.806991	0.505661	0.523785	2.17842	2	membrane-bound ATP synthase AtpI		Other category
ECs1333	1.02748	0.711159	0.806238	1.4559	2	putative membrane protein		Other category
ECs5153	0.715537	0.828893	1.16162	1.28969	2	adenylosuccinate synthetase		Nucleotide metabolism and DNA recombination		Purine metabolism
ECs0265	0.793119	0.616804	0.853585	1.73906	2	guanine-hypoxanthine phosphoribosyltransferase		Nucleotide metabolism and DNA recombination		Purine metabolism
ECs4239	0.75542	0.621063	0.929378	1.69428	2	hypothetical protein		Nucleotide metabolism and DNA recombination		Purine metabolism
ECs3370	0.723717	0.871704	1.00577	1.40284	2	IMP dehydrogenase		Nucleotide metabolism and DNA recombination		Purine metabolism
ECs3920	0.83203	0.640082	1.03526	1.48613	2	regulator of lacZ		Transcription and RNA processing	transcriptional regulation	Purine metabolism
ECs3118	0.733166	0.855471	1.01299	1.40136	2	ribonucleoside-diphosphate reductase 1 beta subunit		Nucleotide metabolism and DNA recombination		Purine metabolism
ECs0036	0.610875	0.884132	1.22993	1.27194	2	carbamoyl-phosphate synthase large subunit		Nucleotide metabolism and DNA recombination		Pyrimidine metabolism
ECs3035	0.80516	0.570873	1.31938	1.28356	2	cytidine/deoxycytidine deaminase		Nucleotide metabolism and DNA recombination		Pyrimidine metabolism
ECs3360	0.926861	0.560587	0.502173	2.02438	2	uracil phosphoribosyltransferase		Nucleotide metabolism and DNA recombination		Pyrimidine metabolism
ECs2873	0.771862	0.702456	0.903011	1.62575	2	uridine/cytidine kinase		Nucleotide metabolism and DNA recombination		Pyrimidine metabolism
ECs4852	0.990425	0.324729	0.287119	2.41391	2	glycerol facilitator protein		Other category
ECs0135	0.97209	0.661807	0.895067	1.46785	2	aspartate 1-decarboxylase		Amino acid and protein metabolism		beta-Alanine metabolism
ECs3127	0.773888	0.772826	0.42421	2.05662	2	anaerobic sn-glycerol-3-phosphate dehydrogenase membrane anchor subunit		Other category		Glycerophospholipid metabolism
ECs0177	0.793646	0.719688	0.912952	1.57617	2	CDP-diglyceride synthetase		Other category		Glycerophospholipid metabolism
ECs5025	0.912226	0.518723	0.99493	1.5641	2	diacylglycerol kinase		Other category		Glycerolipid metabolism
ECs4269	0.793603	0.573404	0.575518	2.07205	2	sn-glycerol-3-phosphate dehydrogenase		Other category		Glycerophospholipid metabolism
ECs4319	0.922918	0.620515	0.756459	1.70376	2	hypothetical protein		Other category		Sulfur relay system
ECs3619	1.06039	0.722331	0.96744	1.24237	2	sulfite reductase (NADPH beta subunit		Other category		Sulfur metabolism
ECs0078	0.94576	0.738075	0.881514	1.43485	2	2-isopropylmalate synthase		Amino acid and protein metabolism		Biosynthesis of amino acids
ECs2744	0.828741	0.586514	0.861221	1.72394	2	putative transposase OrfA protein of insertion sequence IS629		Nucleotide metabolism and DNA recombination
ECs1469	0.840179	0.718419	0.996627	1.44195	2	3-oxoacyl-[acyl-carrier-protein] synthase III; acetylCoA ACP transacylase		Other category		Fatty acid metabolism
ECs0852	0.940758	0.72559	1.08765	1.23626	2	7,8-diaminopelargonic acid synthetase		Other category		Biotin metabolism
ECs1038	0.825721	0.723501	0.997741	1.45069	2	beta-hydroxydecanoyl thioester dehydrase		Other category		Fatty acid metabolism
ECs0853	1.04512	0.680051	1.0499	1.21287	2	biotin synthetase		Other category		Biotin metabolism
ECs3798	0.757842	1.12948	1.12752	0.989278	2	D-erythrose 4-phosphate dehydrogenase		Other category		Vitamin B6 metabolism
ECs1739	1.08287	0.718215	0.884511	1.31013	2	DNA-binding protein H-NS		Nucleotide metabolism and DNA recombination
ECs1752	0.952324	0.720626	0.780999	1.55037	2	energy transducer TonB		Other category
ECs4860	0.885612	0.731431	0.759448	1.63099	2	essential cell division protein		Cell division
ECs4851	0.869804	0.454949	0.830322	1.84219	2	glycerol kinase		Other category		Glycerolipid metabolism
ECs4443	0.801208	0.701736	0.908177	1.59088	2	glycine tRNA synthetase alpha subunit		Nucleotide metabolism and DNA recombination		Aminoacyl-tRNA biosynthesis
ECs0464	0.934362	0.717132	0.899078	1.44856	2	nucleoside-specific channel-forming protein TSX		Nucleotide metabolism and DNA recombination
ECs1716	0.895175	0.666839	0.948856	1.48567	2	peptide chain release factor RF-1		Amino acid and protein metabolism
ECs2650	0.920899	0.695416	0.877801	1.50583	2	phosphatidylglycerophosphate synthetase		Other category		Glycerophospholipid metabolism
ECs1468	0.813798	0.648561	0.848496	1.69222	2	PlsX protein		Other category		Glycerolipid metabolism
ECs1717	0.767886	0.721164	1.17931	1.32225	2	possible protoporphyrinogen oxidase		Other category
ECs5177	0.757993	0.745414	0.93015	1.56976	2	primosomal replication protein N		Nucleotide metabolism and DNA recombination		Homologous recombination
ECs0086	0.837753	0.721183	1.09289	1.34093	2	putative apolipoprotein		Other category
ECs0426	0.813262	0.581692	0.545941	2.07475	2	putative enzyme		Other category
ECs4793	0.732013	0.817397	0.996965	1.4564	2	putative GTP-binding factor		Other category
ECs3431	0.7629	0.910668	1.13527	1.189	2	RecO protein		Nucleotide metabolism and DNA recombination		Homologous recombination
ECs4910	0.752565	0.868126	1.06523	1.31439	2	RNA polymerase beta subunit		Nucleotide metabolism and DNA recombination		RNA polymerase
ECs4160	0.770395	0.719853	1.00565	1.50282	2	RNA polymerase, alpha subunit		Nucleotide metabolism and DNA recombination		RNA polymerase
ECs4047	0.740638	1.05403	1.1003	1.10892	2	tRNA pseudouridine 5S synthase		Nucleotide metabolism and DNA recombination
ECs5235	0.750562	0.893458	0.980415	1.38062	2	valine tRNA synthetase		Nucleotide metabolism and DNA recombination		Aminoacyl-tRNA biosynthesis
ECs2542	0.822888	0.742399	1.01872	1.41323	2	hypothetical protein		Amino acid and protein metabolism		Cysteine and methionine metabolism
ECs0251	0.983445	0.634285	0.717812	1.66862	2	hypothetical protein		Unknown
ECs0429	1.01881	0.692443	0.738746	1.55372	2	hypothetical protein		Unknown
ECs1443	0.873404	0.705533	0.884896	1.53736	2	hypothetical protein		Unknown
ECs2337	0.918371	0.630187	0.814357	1.63838	2	hypothetical protein		Unknown
ECs2495	1.04549	0.575395	1.00008	1.36656	2	hypothetical protein		Unknown
ECs3139	1.0147	0.72591	0.927603	1.32757	2	hypothetical protein		Unknown
ECs3531	1.01125	0.560303	0.710213	1.72003	2	hypothetical protein		Unknown
ECs4628	0.973571	0.669403	0.806089	1.55212	2	hypothetical protein		Unknown
ECs4895	0.971738	0.739927	1.06726	1.21181	2	hypothetical protein		Unknown
ECs5144	0.877815	0.737377	0.938656	1.44552	2	hypothetical protein		Unknown
ECs0430	0.820921	0.739815	1.23275	1.19361	2	hypothetical protein		Unknown
ECs1841	0.723286	0.825696	1.08056	1.36975	2	hypothetical protein		Unknown
ECs2577	0.757022	0.85494	0.928652	1.46569	2	hypothetical protein		Unknown
ECs2630	0.778929	0.704837	1.04835	1.46396	2	hypothetical protein		Unknown
ECs2667	0.778992	0.895282	1.23347	1.08459	2	hypothetical protein		Unknown
ECs3815	0.832521	0.662018	1.12826	1.36687	2	hypothetical protein		Unknown
ECs4699	0.838579	0.705102	1.06973	1.37999	2	hypothetical protein		Unknown
ECs5031	0.744539	0.826183	1.16954	1.25423	2	hypothetical protein		Unknown
ECs0674	0.742272	0.698543	0.883564	1.68034	2	hypothetical protein		Unknown
ECs2289	0.836969	0.606992	0.516238	2.05686	2	hypothetical protein		Unknown
ECs5725	0.958968	0.68606	0.918909	1.43275	2	#N/A		Unknown
ECs5486	0.895263	0.578981	0.938082	1.5824	2	#N/A		Unknown
ECs5765	0.885242	0.723173	0.822389	1.57349	2	#N/A		Unknown
ECs5744	0.79583	0.650168	0.8438	1.71404	2	#N/A		Unknown
ECs4774	1.30198	1.00792	0.951636	0.732566	3	3-hydroxyacyl-CoA dehydrogenase/ 3-hydroxybutyryl-CoA epimerase/ delta(3)-cis-delta(2)-trans-enoyl-CoA isomerase/ enoyl-CoA hydratase	antibiotics biosynthesis	Stress response	antibiotics biosynthesis	Biosynthesis of antibiotics
ECs4773	1.25462	0.966153	1.14945	0.614732	3	acetyl-CoA transferase	antibiotics biosynthesis	Stress response	antibiotics biosynthesis	Biosynthesis of antibiotics
ECs3224	1.26639	0.9097	0.841617	0.979995	3	putative enzyme	antibiotics biosynthesis	Stress response	antibiotics biosynthesis	Biosynthesis of antibiotics
ECs3029	1.26276	0.862173	1.08005	0.780284	3	putative isomerase	antibiotics biosynthesis	Amino acid and protein metabolism	antibiotics biosynthesis	Tyrosine metabolism
ECs1881	1.5038	0.865403	0.767334	0.856904	3	phage shock protein	prophage	Stress response	prophage
ECs1882	1.67014	0.80391	0.660068	0.858151	3	phage shock protein	prophage	Stress response	prophage
ECs1884	1.82017	0.808346	0.554972	0.8097	3	phage shock protein	prophage	Stress response	prophage
ECs1885	1.28481	0.792209	1.06482	0.841676	3	phage shock protein	prophage	Stress response	prophage
ECs2754	1.22606	0.920712	0.920519	0.928089	3	prophage maintenance protein	prophage	Other category	prophage
ECs5121	1.26371	0.80229	0.787553	1.14395	3	suppressor of F exclusion of bacteriophage T7	prophage	Transcription and RNA processing	prophage
ECs2715	1.24807	1.05809	0.944091	0.747026	3	EspF-like protein	T3SS	Pathogenicity	T3SS	Pathogenic Escherichia coli infection
ECs1420	1.26142	0.981228	1.06418	0.682374	3	curlin major subunit CsgA	biofilm formation	Pathogenicity	biofilm formation	Biofilm formation - Escherichia coli
ECs0662	1.3487	0.678421	1.10359	0.8462	3	cold shock protein	cold shock protein	Stress response
ECs1145	1.27706	1.00676	1.06405	0.641567	3	cold shock-like protein CspG	cold shock protein	Stress response
ECs4588	1.54846	0.67252	0.826542	0.93678	3	Ler protein	quorum sensing	Pathogenicity	quorum sensing	Quorum sensing
ECs1439	1.47699	1.01892	0.670734	0.836173	3	damage-inducible protein DinI	SOS response	Stress response	SOS response
ECs3478	1.32274	0.936055	0.784568	0.956163	3	DNA repair protein RecN	SOS response	Nucleotide metabolism and DNA recombination	SOS response
ECs1678	1.19549	1.08315	0.854068	0.870952	3	UmuD protein	SOS response	Stress response	SOS response
ECs2662	1.35983	0.730857	0.524311	1.39039	3	flagellin	two-component system	Pathogenicity	two-component system	Two-component system
ECs1130	1.16357	1.06203	1.017	0.753691	3	probable Ni/Fe-hydrogenase 1 b-type cytochrome subunit	two-component system	Stress response	two-component system	Two-component system
ECs3565	1.10637	0.689881	1.12155	1.0653	3	putative 2-component transcriptional regulator	two-component system	Pathogenicity	two-component system
ECs3907	1.21527	1.03647	0.816632	0.935274	3	putative 2-component transcriptional regulator	two-component system	Pathogenicity	two-component system	Quorum sensing
ECs5019	2.32661	0.768806	0.40839	0.481184	3	maltose high-affinity receptor LamB	pathogenicity	Pathogenicity
ECs4189	1.22001	1.21016	0.955004	0.616385	3	bacterioferrin	stress response	Stress response		Porphyrin and chlorophyll metabolism
ECs1093	1.15549	0.99805	0.979331	0.863734	3	putative endopeptidase	endopeptidase	Amino acid and protein metabolism
ECs3660	1.57654	0.949733	0.621439	0.852841	3	L-fuculose-1-phosphate aldolase	carbohydrate metabolism	Carbohydrate metabolism		Fructose and mannose metabolism
ECs3661	1.62159	1.14873	0.766222	0.461158	3	fucose permease	carbohydrate metabolism	Carbohydrate metabolism
ECs3664	1.24618	1.11193	0.992003	0.646373	3	protein of fucose operon	carbohydrate metabolism	Nucleotide metabolism and DNA recombination
ECs5017	2.48145	0.708753	0.356729	0.434612	3	periplasmic maltose-binding protein	carbohydrate metabolism	Stress response	chemotaxis	Bacterial chemotaxis
ECs3572	1.4307	1.15774	0.674192	0.74497	3	6-phospho-beta-glucosidase	carbohydrate metabolism	Carbohydrate metabolism		Glycolysis / Gluconeogenesis
ECs3571	1.46049	1.11012	0.819022	0.609028	3	beta-glucosides specific PTS system enzyme II ABC	carbohydrate metabolism	Carbohydrate metabolism		Glycolysis / Gluconeogenesis
ECs0202	1.24762	0.938251	1.03176	0.772345	3	putative phosphatase	carbohydrate metabolism	Carbohydrate metabolism	lipopolysaccharide	Lipopolysaccharide biosynthesis
ECs0374	1.50552	1.07175	0.756298	0.6658	3	putative sugar-binding protein	carbohydrate metabolism	Carbohydrate metabolism
ECs0065	1.56191	1.02308	0.887522	0.517791	3	L-ribulose-5-phosphate 4-epimerase	carbohydrate metabolism	Carbohydrate metabolism		Pentose and glucuronate interconversions
ECs4377	1.24716	1.03584	0.907542	0.807903	3	outer membrane protein Slp	outer membrane protein	Pathogenicity	outer membrane protein
ECs5020	2.16503	0.748265	0.552255	0.51658	3	periplasmic protein of mal regulon	regulon	Transcription and RNA processing	transcriptional regulation
ECs0327	1.35452	0.851206	0.929587	0.854233	3	putative ribosomal protein	ribosome	Transcription and RNA processing	ribosome	Ribosome
ECs1042	1.17362	0.921877	1.01101	0.886074	3	suppressor of lon	suppressor	Transcription and RNA processing	transcriptional regulation
ECs4848	1.18522	1.0346	1.12353	0.646556	3	putative regulator	TF	Transcription and RNA processing	transcriptional regulation
ECs0150	1.22531	1.12444	0.861375	0.792456	3	probable regulator for maltose metabolism	TF	Carbohydrate metabolism
ECs3525	1.20954	1.14737	0.990407	0.651198	3	putative transcriptional regulator	TF	Transcription and RNA processing	transcriptional regulation
ECs0068	1.18792	1.15376	0.960617	0.698398	3	transcriptional regulator for ara operon	TF	Transcription and RNA processing	transcriptional regulation
ECs4296	1.30821	1.14321	0.855893	0.694712	3	ATP-binding component of sn-glycerol 3-phosphate transport system	transport	Transport		ABC transporters
ECs5018	2.06806	1.09162	0.396243	0.445363	3	ATP-binding component of transport system for maltose	transport	Transport		ABC transporters
ECs4299	1.40633	1.19178	0.733084	0.675203	3	periplasmic binding protein of sn-glycerol 3-phosphate transport system	transport	Transport		ABC transporters
ECs4420	1.18689	0.981366	0.951377	0.876974	3	putative ATP-binding component of dipeptide transport system	transport	Transport		ABC transporters
ECs0415	1.15583	0.918592	1.04593	0.870988	3	putative periplasmic-iron-binding protein	transport	Transport		ABC transporters
ECs3031	1.18943	0.954101	0.957429	0.894572	3	putative transport protein	transport	Transport
ECs3971	1.15179	0.893758	1.02829	0.917795	3	putative transport protein	transport	Transport
ECs5207	1.30593	0.898708	1.10793	0.671133	3	putative transport system permease protein	transport	Transport
ECs5208	1.33357	1.01364	0.910069	0.738054	3	putative transport system permease protein	transport	Transport
ECs3227	1.29844	1.08475	1.00092	0.60977	3	long-chain fatty acid transport protein FadL	transport	Transport
ECs0307	1.58472	1.21888	0.607268	0.59723	3	hypothetical membrane protein		Other category
ECs1131	1.15945	0.863093	1.07464	0.891235	3	processing of HyaA and HyaB proteins		Other category
ECs4759	1.2225	0.964677	0.878587	0.932863	3	tetrahydropteroyltriglutamate methyltransferase		Amino acid and protein metabolism		Biosynthesis of amino acids
ECs0422	1.17976	0.921019	1.174	0.70989	3	taurine dioxygenase		Other category		Sulfur metabolism
ECs3617	1.20266	0.916088	1.04922	0.821843	3	3'-phosphoadenosine 5'-phosphosulfate reductase		Other category		Sulfur metabolism
ECs0854	1.1911	0.690944	1.09311	1.00697	3	8-amino-7-oxononanoate synthase		Other category		Biotin metabolism
ECs2613	1.42801	0.771299	0.382316	1.42967	3	cytoplasmic ferritin		Other category
ECs4923	1.25362	1.00238	0.882785	0.859769	3	DNA-binding protein HU-alpha		Nucleotide metabolism and DNA recombination
ECs4295	1.16345	1.03963	1.00921	0.783774	3	glycerophosphodiester phosphodiesterase		Other category		Glycerophospholipid metabolism
ECs0382	1.2422	0.89174	0.953578	0.905082	3	putative cytochrome subunit of dehydrogenase		Other category
ECs4003	1.20514	1.12012	0.936724	0.738479	3	putative dehydrogenase		Other category		Glyoxylate and dicarboxylate metabolism
ECs2184	1.4248	1.59263	0.329003	0.689149	3	putative endopeptidase		Amino acid and protein metabolism
ECs3030	1.18766	0.931757	1.0969	0.772076	3	putative gentisate 1,2-dioxygenase		Amino acid and protein metabolism		Tyrosine metabolism
ECs1370	1.18456	0.906104	1.13786	0.757335	3	putative glucosyl-transferase		Other category
ECs3028	1.35182	0.839473	1.01644	0.777467	3	putative glutathione-S-transferase		Amino acid and protein metabolism		Tyrosine metabolism
ECs3963	1.42775	0.986772	0.75602	0.828754	3	putative NADPH dehydrogenase		Other category
ECs3027	1.29189	0.714986	1.26118	0.703942	3	putative salicylate hydroxylase		Other category		Benzoate degradation
ECs1179	1.15396	0.976653	0.991308	0.87359	3	single strand binding protein Ea10		Nucleotide metabolism and DNA recombination
ECs1960	1.36434	0.917803	0.646814	1.07545	3	hypothetical protein		Unknown
ECs2695	1.4472	1.28206	0.474971	0.815624	3	hypothetical protein		Unknown
ECs3037	1.50428	0.690591	0.567186	1.23623	3	hypothetical protein		Unknown
ECs3905	1.71002	0.879603	0.886176	0.506654	3	hypothetical protein		Unknown
ECs4584	1.40118	1.12569	0.735104	0.742724	3	hypothetical protein		Unknown
ECs4585	1.35416	1.01267	0.716429	0.920637	3	hypothetical protein		Unknown
ECs4586	1.53529	0.934308	0.638154	0.892752	3	hypothetical protein		Unknown
ECs4587	1.52888	0.92071	0.724915	0.821702	3	hypothetical protein		Unknown
ECs5032	1.40214	0.579735	0.707873	1.3018	3	hypothetical protein		Unknown
ECs0770	1.20908	0.896479	1.0579	0.825251	3	hypothetical protein		Unknown
ECs0982	1.17696	1.0994	1.02983	0.690091	3	hypothetical protein		Unknown
ECs1567	1.28758	0.969697	0.911004	0.827128	3	hypothetical protein		Unknown
ECs2506	1.2853	0.66283	1.1283	0.900658	3	hypothetical protein		Unknown
ECs2774	1.2635	0.866952	0.966147	0.894157	3	hypothetical protein		Unknown
ECs3257	1.24426	0.999252	0.95335	0.798534	3	hypothetical protein		Unknown
ECs3499	1.30945	0.804797	0.907444	0.968932	3	hypothetical protein		Unknown
ECs3893	1.16146	0.939763	0.831098	1.06959	3	hypothetical protein		Unknown
ECs4034	1.2082	1.13209	0.954168	0.705409	3	hypothetical protein		Unknown
ECs4140	1.18078	0.865046	0.989373	0.956711	3	hypothetical protein		Unknown
ECs4633	1.25467	1.16197	0.90088	0.684362	3	hypothetical protein		Unknown
ECs5701	1.26924	0.875315	1.11514	0.724067	3	#N/A		Unknown
ECs5757	1.15541	1.17697	1.03247	0.633971	3	#N/A		Unknown
ECs0991	0.857551	0.875869	0.608946	1.67683	4	5-enolpyruvylshikimate-3-phosphate synthetase	antibiotics biosynthesis	Stress response	antibiotics biosynthesis	Biosynthesis of antibiotics
ECs0527	0.788036	0.694532	0.657203	1.87429	4	adenylate kinase	antibiotics biosynthesis	Stress response	antibiotics biosynthesis	Biosynthesis of antibiotics
ECs3776	0.67359	0.583675	0.483355	2.28192	4	aminomethyltransferase	antibiotics biosynthesis	Stress response	antibiotics biosynthesis	Biosynthesis of antibiotics
ECs0002	0.737705	0.693922	0.809819	1.76677	4	aspartokinase I-homoserine dehydrogenase I	antibiotics biosynthesis	Stress response	antibiotics biosynthesis	Biosynthesis of antibiotics
ECs4721	0.750158	0.889621	0.723213	1.65415	4	dTDP-glucose 4,6-dehydratase	antibiotics biosynthesis	Stress response	antibiotics biosynthesis	Biosynthesis of antibiotics
ECs4722	0.732385	0.882379	0.791836	1.60759	4	glucose-1-phosphate thymidylyltransferase	antibiotics biosynthesis	Stress response	antibiotics biosynthesis	Biosynthesis of antibiotics
ECs4091	0.701875	0.747493	0.746454	1.81781	4	glutamate synthase large subunit	antibiotics biosynthesis	Stress response	antibiotics biosynthesis	Biosynthesis of antibiotics
ECs3775	0.757377	0.986576	0.780384	1.49245	4	glycine cleavage system H protein	antibiotics biosynthesis	Stress response	antibiotics biosynthesis	Biosynthesis of antibiotics
ECs4708	0.598752	0.628402	0.546364	2.24931	4	ketol-acid reductoisomerase	antibiotics biosynthesis	Stress response	antibiotics biosynthesis	Biosynthesis of antibiotics
ECs3701	0.913861	0.654205	0.665301	1.77574	4	putative acyltransferase	antibiotics biosynthesis	Stress response	antibiotics biosynthesis	Two-component system
ECs2052	0.921556	0.752299	0.677753	1.65929	4	putative resistance protein	antibiotics biosynthesis	Stress response	antibiotics biosynthesis	Biosynthesis of antibiotics
ECs3417	0.811341	0.727036	0.737295	1.7348	4	serine hydroxymethyltransferase	antibiotics biosynthesis	Stress response	antibiotics biosynthesis	Biosynthesis of antibiotics
ECs4455	0.91906	0.750613	0.688796	1.65193	4	valine-pyruvate transaminase	antibiotics biosynthesis	Stress response	antibiotics biosynthesis	Biosynthesis of antibiotics
ECs0051	0.782659	0.744335	0.570542	1.92209	4	dihydrofolate reductase type I; trimethoprim resistance	antibiotics resistance	Stress response	antibiotics resistance	Folate biosynthesis
ECs1012	1.05009	0.644175	0.471935	1.848	4	outer membrane protein 1a	antibiotics resistance	Pathogenicity	antibiotics resistance	beta-Lactam resistance
ECs4238	0.843421	0.738621	0.771275	1.65496	4	peptidoglycan synthetase	antibiotics resistance	Stress response	antibiotics resistance	beta-Lactam resistance
ECs0673	0.85208	0.674134	0.684345	1.79989	4	peptidoglycan synthetase penicillin-binding protein 2	antibiotics resistance	Stress response	antibiotics resistance	beta-Lactam resistance
ECs0101	0.847513	0.818636	0.602628	1.74949	4	hypothetical protein	secretion	Pathogenicity	secretion	Bacterial secretion system
ECs0459	0.826686	0.65309	0.659847	1.87214	4	protein-export membrane protein SecD	secretion	Pathogenicity	secretion	Bacterial secretion system
ECs0460	0.846166	0.683503	0.685712	1.79542	4	protein-export membrane protein secF	secretion	Pathogenicity	secretion	Bacterial secretion system
ECs2601	0.797992	0.596631	0.679264	1.93627	4	regulator of flagellar biosynthesis FlhC	biofilm formation	Pathogenicity	biofilm formation	Biofilm formation - Escherichia coli
ECs2602	0.712158	0.406683	0.538472	2.35688	4	regulator of flagellar biosynthesis FlhD	biofilm formation	Pathogenicity	biofilm formation	Biofilm formation - Escherichia coli
ECs1491	0.836414	0.853915	0.502576	1.83133	4	hypothetical protein	CAMP resistance	Stress response		Cationic antimicrobial peptide (CAMP resistance
ECs3147	0.883326	0.7701	0.536263	1.82944	4	polymyxin resistance protein B	CAMP resistance	Stress response	antibiotics resistance	Cationic antimicrobial peptide (CAMP resistance
ECs3674	0.705291	0.83561	0.837233	1.63343	4	putative amidase	CAMP resistance	Stress response		Cationic antimicrobial peptide (CAMP resistance
ECs3143	0.988943	0.613142	0.684115	1.71884	4	putative transformylase	CAMP resistance	Stress response		Cationic antimicrobial peptide (CAMP resistance
ECs3146	0.99533	0.681962	0.620653	1.71174	4	putative transport/receptor protein	CAMP resistance	Stress response		Cationic antimicrobial peptide (CAMP resistance
ECs4640	0.870317	0.67452	0.674839	1.79073	4	60 KD inner-membrane protein	quorum sensing	Pathogenicity	quorum sensing	Quorum sensing
ECs0178	0.834948	0.751782	0.743648	1.67979	4	hypothetical protein	quorum sensing	Pathogenicity	quorum sensing	Quorum sensing
ECs4054	0.826886	0.635361	0.763058	1.7811	4	protein-export protein SecG	quorum sensing	Pathogenicity	quorum sensing	Quorum sensing
ECs2937	0.840105	0.741048	0.531316	1.90733	4	putative 2-component sensor protein	two-component system	Pathogenicity	two-component system
ECs2314	0.632537	0.350421	0.435297	2.60155	4	response transcriptional regulatory protein RstB sensor	two-component system	Pathogenicity	two-component system	Two-component system
ECs2315	0.618723	0.389484	0.318392	2.70015	4	sensor histidine protein kinase RstA regulator	two-component system	Pathogenicity	two-component system	Two-component system
ECs2871	0.819556	0.840391	0.697628	1.65754	4	suppressor of ompF assembly mutants	two-component system	Pathogenicity	two-component system
ECs2541	0.878303	0.67629	0.667225	1.78877	4	ProP effector	pathogenicity	Pathogenicity
ECs1837	0.527087	1.04449	0.370487	2.10206	4	trp operon leader peptide	pathogenicity	Pathogenicity
ECs2112	0.98624	0.986046	0.250507	1.8127	4	putative fimbrial chaperone protein precursor	fimbrial	Cell motility	cell motility
ECs2113	0.448383	0.215628	0.150813	3.22001	4	putative type 1 fimbrial protein precursor	fimbrial	Cell motility	cell motility
ECs5149	0.882633	0.860071	0.600018	1.67578	4	GTP - binding subunit of protease specific for phage lambda cII repressor	prophage	Other category	prophage
ECs5150	0.798895	0.76451	0.760748	1.68655	4	protease specific for phage lambda cII repressor	prophage	Other category	prophage
ECs5151	0.812951	0.771439	0.712648	1.71573	4	protease specific for phage lambda cII repressor	prophage	Other category	prophage
ECs2539	0.878425	0.650498	0.668593	1.81233	4	heat shock protein HtpX	heat shock protein	Stress response	HSP
ECs0059	0.876978	0.740073	0.746883	1.64461	4	organic solvent tolerance protein	stress response	Stress response
ECs0587	0.880443	0.791551	0.597681	1.74719	4	peptidyl-prolyl cis-trans isomerase B	stress response	Stress response
ECs2540	0.883459	0.759709	0.707417	1.66016	4	carboxy-terminal protease for penicillin-binding protein 3	stress response	Stress response
ECs0776	0.861326	0.71458	0.831037	1.59738	4	peptidoglycan-associated lipoprotein	peptidoglycan	Amino acid and protein metabolism
ECs0921	0.825296	0.561732	0.687369	1.93369	4	hypothetical protein	peptidoglycan	Carbohydrate metabolism		Peptidoglycan biosynthesis
ECs4884	1.01472	0.620937	0.634505	1.73672	4	membrane protein	lipopolysaccharide	Stress response	lipopolysaccharide	Lipopolysaccharide biosynthesis
ECs2828	0.88733	0.694825	0.616621	1.81445	4	regulator of length of O-antigen component of lipopolysaccharide chains	lipopolysaccharide	Transcription and RNA processing	lipopolysaccharide
ECs4692	0.820523	0.791045	0.692474	1.70999	4	D-ribose high-affinity transport system permease protein	D-ribose	Transport		ABC transporters
ECs4690	0.919971	0.80247	0.482944	1.8161	4	membrane-associated component of D-ribose high-affinity transport system	D-ribose	Transport		ABC transporters
ECs4014	0.756784	0.737475	0.737926	1.78005	4	N-acetyl-galactosamine / galactosamine PTS system enzyme IIA component	galactose	Carbohydrate metabolism		Galactose metabolism
ECs4011	0.685816	0.814513	0.727726	1.78868	4	N-acetylgalactosamine-specific PTS system enzyme IIB component	galactose	Carbohydrate metabolism		Galactose metabolism
ECs4013	0.719715	0.861557	0.857661	1.57195	4	N-acetylgalactosamine-specific PTS system enzyme IID component	galactose	Carbohydrate metabolism		Galactose metabolism
ECs2847	0.838788	0.733084	0.643725	1.7987	4	putative UDP-galactose 4-epimerase	galactose	Carbohydrate metabolism
ECs1426	0.867257	0.853903	0.643342	1.65221	4	periplasmic glucans biosynthesis protein	carbohydrate metabolism	Carbohydrate metabolism
ECs4720	0.760747	0.866187	0.875566	1.50651	4	UDP-N-acetyl-D-mannosaminuronic acid dehydrogenase	carbohydrate metabolism	Carbohydrate metabolism		Amino sugar and nucleotide sugar metabolism
ECs0772	0.893136	0.636667	0.671983	1.80712	4	inner membrane protein TolQ	membrane	Cell division
ECs4481	0.843067	0.560099	0.725726	1.87684	4	L-lactate permease	membrane	Transport
ECs3673	0.823614	0.748993	0.793136	1.64233	4	membrane-bound lytic murein transglycosylase A	membrane	Other category
ECs0773	0.865435	0.613954	0.729922	1.79702	4	putative inner membrane protein TolR	membrane	Other category
ECs3378	0.82312	0.718477	0.771962	1.69472	4	putative membrane protein	membrane	Other category
ECs2338	0.813309	0.62585	0.706803	1.86323	4	putative membrane protein	membrane	Other category
ECs0672	0.831991	0.858058	0.653195	1.6741	4	rod shape-determining membrane protein	membrane	Other category
ECs4751	0.756318	0.983792	0.799665	1.47606	4	outer membrane phospholipase A	outer membrane protein	Pathogenicity	outer membrane protein	Glycerophospholipid metabolism
ECs0892	0.66989	0.611851	0.697406	2.03411	4	outer membrane protein X	outer membrane protein	Pathogenicity	outer membrane protein
ECs2350	0.873252	0.624965	0.676473	1.83425	4	putative outer membrane protein	outer membrane protein	Pathogenicity	outer membrane protein
ECs4267	0.934766	0.737755	0.615477	1.72509	4	protein of glp regulon	regulon	Transcription and RNA processing	transcriptional regulation
ECs5167	0.764183	0.987046	0.868136	1.39309	4	putative DEOR-type transcriptional regulator	TF	Transcription and RNA processing	transcriptional regulation
ECs0501	0.787423	0.73006	0.812795	1.67737	4	putative LRP-like transcriptional regulator	TF	Transcription and RNA processing	transcriptional regulation
ECs4493	1.03107	0.513955	0.666702	1.79036	4	putative regulator	TF	Transcription and RNA processing	transcriptional regulation
ECs4136	0.972409	0.974286	0.357861	1.72593	4	putative transcriptional regulator	TF	Transcription and RNA processing	transcriptional regulation
ECs4615	0.901201	0.680233	0.731217	1.69438	4	putative transcriptional regulator	TF	Transcription and RNA processing	transcriptional regulation
ECs0649	0.746194	0.528461	0.798867	1.93061	4	regulator of nucleoside diphosphate kinase	TF	Transcription and RNA processing	transcriptional regulation
ECs2367	0.721835	0.783809	0.917533	1.58276	4	transcriptional repressor for pur regulon	TF	Transcription and RNA processing	transcriptional regulation
ECs4172	0.743159	0.821753	0.874601	1.56886	4	30S ribosomal subunit protein S14	30S ribosome	Transcription and RNA processing	ribosome	Ribosome
ECs5178	0.763813	0.771517	0.919995	1.549	4	30S ribosomal subunit protein S18	30S ribosome	Transcription and RNA processing	ribosome	Ribosome
ECs4181	0.753751	0.77704	0.777066	1.70366	4	30S ribosomal subunit protein S19	30S ribosome	Transcription and RNA processing	ribosome	Ribosome
ECs0171	0.857827	0.707246	0.793019	1.64793	4	30S ribosomal subunit protein S2	30S ribosome	Transcription and RNA processing	ribosome	Ribosome
ECs4168	0.766439	0.858302	0.896956	1.48594	4	30S ribosomal subunit protein S5	30S ribosome	Transcription and RNA processing	ribosome	Ribosome
ECs4104	0.809592	0.792776	0.754761	1.6543	4	50S ribosomal subunit protein L13	50S ribosome	Transcription and RNA processing	ribosome	Ribosome
ECs3469	0.909092	0.704564	0.700404	1.69485	4	50S ribosomal subunit protein L19	50S ribosome	Transcription and RNA processing	ribosome	Ribosome
ECs4065	0.816139	0.747177	0.694953	1.75461	4	50S ribosomal subunit protein L21	50S ribosome	Transcription and RNA processing	ribosome	Ribosome
ECs3077	0.886098	0.664044	0.620497	1.84162	4	50S ribosomal subunit protein L25	50S ribosome	Transcription and RNA processing	ribosome	Ribosome
ECs4511	0.898737	0.69104	0.690782	1.72874	4	50S ribosomal subunit protein L33	50S ribosome	Transcription and RNA processing	ribosome	Ribosome
ECs1571	0.752021	0.961325	0.868546	1.43021	4	ATP-binding component of spermidine/putrescine transport	transport	Transport		ABC transporters
ECs1494	0.715096	0.750608	0.721827	1.82698	4	hypothetical protein	transport	Transport		ABC transporters
ECs4073	0.790326	0.760287	0.621095	1.84573	4	hypothetical protein	transport	Transport		ABC transporters
ECs1495	0.721555	0.773026	0.723851	1.79639	4	putative ATP-binding component of a transport system	transport	Transport		ABC transporters
ECs4074	0.72612	0.703712	0.667337	1.91837	4	putative ATP-binding component of a transport system	transport	Transport		ABC transporters
ECs0557	0.854832	0.836238	0.675338	1.64867	4	putative ATP-binding component of a transport system	transport	Transport
ECs3100	0.8996	0.657116	0.575186	1.88195	4	putative ATP-binding component of a transport system	transport	Transport		ABC transporters
ECs0503	0.829296	0.756098	0.72599	1.69989	4	putative ATP-binding component of a transport system	transport	Transport		ABC transporters
ECs1496	0.875368	0.84258	0.637279	1.66125	4	putative kinase	transport	Transport		ABC transporters
ECs4072	0.808528	0.840447	0.687852	1.67906	4	hypothetical protein	transport	Transport		ABC transporters
ECs4365	0.873228	0.710036	0.781348	1.64161	4	low-affinity phosphate transport	transport	Transport
ECs0774	0.849688	0.616639	0.627664	1.91769	4	membrane spanning protein TolA	transport	Transport
ECs5219	0.884301	0.885054	0.315574	1.94765	4	Mg2+ transport ATPase	transport	Transport
ECs0922	0.859816	0.85141	0.634485	1.67157	4	proton motive force efflux pump	transport	Transport
ECs2816	1.02903	0.592759	0.649657	1.73358	4	putative amino acid/amine transport protein	transport	Transport
ECs3210	0.85038	0.864353	0.617284	1.68668	4	putative transporting ATPase	transport	Transport
ECs3125	0.848779	0.262499	0.154118	2.75938	4	sn-glycerol-3-phosphate permease	transport	Transport
ECs1721	0.759506	0.854382	0.800344	1.59807	4	sodium-calcium/proton antiporter	transport	Transport
ECs3975	0.63402	0.68698	0.792593	1.89814	4	transport protein of hexuronates	transport	Transport
ECs3067	0.820962	0.682152	0.797057	1.70602	4	putative lipoprotein	transport	Transport
ECs0695	0.802817	0.802327	0.749345	1.65764	4	apolipoprotein N-acyltransferase	transport	Transport
ECs3064	0.724233	0.681752	0.758859	1.84584	4	putative oxidoreductase		Other category
ECs5318	0.726991	0.680389	0.66538	1.94224	4	putative oxidoreductase		Other category
ECs5075	0.714884	0.831708	0.902016	1.55952	4	phosphonate metabolism		Other category		Phosphonate and phosphinate metabolism
ECs5084	0.364737	0.654585	0.572708	2.43675	4	phosphonate metabolism		Other category		Phosphonate and phosphinate metabolism
ECs0176	0.859406	0.669459	0.629003	1.85488	4	undecaprenyl pyrophosphate synthetase		Other category		Terpenoid backbone biosynthesis
ECs0522	0.857361	0.703668	0.808043	1.63616	4	adenine phosphoribosyltransferase		Nucleotide metabolism and DNA recombination		Purine metabolism
ECs0530	0.797973	0.749439	0.825014	1.63486	4	inosine-guanosine kinase		Nucleotide metabolism and DNA recombination		Purine metabolism
ECs4241	0.864938	0.888335	0.618525	1.64707	4	putative phosphatase		Nucleotide metabolism and DNA recombination		Purine metabolism
ECs3117	0.805559	0.704557	0.811021	1.68542	4	ribonucleoside diphosphate reductase 1 alpha subunit		Nucleotide metabolism and DNA recombination		Purine metabolism
ECs0993	0.870819	0.786174	0.61456	1.74464	4	cytidylate kinase		Nucleotide metabolism and DNA recombination		Pyrimidine metabolism
ECs0003	0.785817	0.686	0.734927	1.80347	4	homoserine kinase		Amino acid and protein metabolism		Biosynthesis of amino acids
ECs2449	0.984123	0.696061	0.514943	1.82025	4	spheroplast protein Y		Other category
ECs3126	0.665489	0.475464	0.369426	2.51492	4	anaerobic sn-glycerol-3-phosphate dehydrogenase large subunit		Other category		Glycerophospholipid metabolism
ECs3124	0.760034	0.547909	0.471353	2.24047	4	glycerophosphodiester phosphodiesterase		Other category		Glycerophospholipid metabolism
ECs0457	0.878257	0.774431	0.569052	1.79609	4	tRNA-guanine transglycosylase		Nucleotide metabolism and DNA recombination
ECs3941	0.97359	0.87963	0.527552	1.63915	4	putative kinase		Other category		Folate biosynthesis
ECs0963	0.601126	0.375116	0.459944	2.58398	4	putative enzyme		Other category
ECs4328	0.801749	0.753775	0.688834	1.76939	4	putative acyl carrier protein		Other category
ECs4329	0.788529	0.777194	0.784113	1.66038	4	putative acyl carrier protein		Other category
ECs0004	0.810069	0.74619	0.71704	1.73868	4	threonine synthase		Amino acid and protein metabolism		Biosynthesis of amino acids
ECs1836	0.506052	0.818699	0.641744	2.05942	4	anthranilate synthase component I		Amino acid and protein metabolism		Biosynthesis of amino acids
ECs0704	0.862135	0.81069	0.675116	1.66627	4	asparagine synthetase B		Amino acid and protein metabolism		Alanine, aspartate and glutamate metabolism
ECs0588	0.784218	0.675286	0.691585	1.86094	4	cysteine tRNA synthetase		Nucleotide metabolism and DNA recombination		Aminoacyl-tRNA biosynthesis
ECs4132	0.761626	0.554765	0.750165	1.94015	4	putative dehydrogenase		Other category
ECs4133	0.923233	0.594465	0.636663	1.85427	4	site-specific DNA inversion stimulation factor		Nucleotide metabolism and DNA recombination
ECs4680	0.880909	0.703325	0.632064	1.7966	4	membrane-bound ATP synthase subunit a AtpB		Other category		Oxidative phosphorylation
ECs2491	0.759786	0.777912	0.874253	1.59482	4	putative scaffolding protein in the formation of a murein-synthesizing holoenzyme		Other category
ECs0488	1.00531	0.753868	0.466691	1.79272	4	putative polymerase/proteinase		Amino acid and protein metabolism
ECs1138	0.719654	0.675318	0.792981	1.82107	4	putative phosphatase		Other category
ECs0147	0.785611	0.682833	0.749183	1.79184	4	poly(A) polymerase I		Nucleotide metabolism and DNA recombination		RNA degradation
ECs0875	0.73806	0.788147	0.82868	1.65492	4	putative ATP-dependent RNA helicase		Transcription and RNA processing	transcriptional regulation	RNA degradation
ECs3080	0.778764	0.720776	0.740702	1.77082	4	putative sulfatase		Other category
ECs0671	0.841536	0.812472	0.703511	1.65597	4	a minor lipoprotein		Other category
ECs3973	0.656369	0.762715	0.762776	1.83266	4	altronate hydrolase		Carbohydrate metabolism		Pentose and glucuronate interconversions
ECs2586	0.795229	0.696344	0.774366	1.74242	4	arginine tRNA synthetase		Nucleotide metabolism and DNA recombination		Aminoacyl-tRNA biosynthesis
ECs3342	0.919694	0.7885	0.672038	1.63194	4	bacterioferritin comigratory protein		Other category
ECs3284	0.820279	0.743897	0.786583	1.65758	4	cell division protein involved in FtsZ ring		Cell division
ECs3199	0.886737	0.825857	0.640113	1.66288	4	dihydrofolate:folylpolyglutamate synthetase		Other category		Folate biosynthesis
ECs3677	0.761781	0.86671	0.72435	1.66331	4	DNA helicase RecB		Nucleotide metabolism and DNA recombination		Homologous recombination
ECs0678	0.869773	0.944793	0.516636	1.69384	4	DNA polymerase III delta subunit		Nucleotide metabolism and DNA recombination		DNA replication
ECs1846	0.766929	0.942689	0.848421	1.45411	4	DNA topoisomerase type I omega protein		Nucleotide metabolism and DNA recombination
ECs3376	0.848343	0.752935	0.716101	1.69376	4	histidine tRNA synthetase		Nucleotide metabolism and DNA recombination		Aminoacyl-tRNA biosynthesis
ECs4043	0.761558	0.878841	0.885636	1.48281	4	inducible ATP-independent RNA helicase		Transcription and RNA processing	transcriptional regulation	RNA degradation
ECs0718	0.785853	0.804723	0.745085	1.67721	4	negative modulator of initiation of replication		Nucleotide metabolism and DNA recombination
ECs3763	0.773076	0.634037	0.799465	1.79956	4	peptide chain release factor RF-2		Amino acid and protein metabolism
ECs0775	0.848951	0.684792	0.725983	1.74912	4	periplasmic protein TolB		Other category
ECs5319	0.884404	0.740488	0.493822	1.90161	4	phosphoglycerol transferase I		Other category
ECs0412	0.690233	0.884761	0.761579	1.68029	4	putative alpha helix chain		Nucleotide metabolism and DNA recombination
ECs3425	0.749194	0.96502	0.855466	1.44322	4	putative deaminase		Other category
ECs3063	0.878601	0.734041	0.728046	1.66854	4	putative elongation factor		Nucleotide metabolism and DNA recombination
ECs0495	0.864951	0.724751	0.829548	1.58531	4	putative protease maturation protein		Amino acid and protein metabolism
ECs4639	0.812413	0.696766	0.815372	1.6814	4	ribonuclease P protein component		Nucleotide metabolism and DNA recombination
ECs0185	0.813186	0.731172	0.801073	1.66209	4	RNAse HII		Nucleotide metabolism and DNA recombination		DNA replication
ECs4518	0.801802	0.782331	0.768984	1.65758	4	RNase PH		Nucleotide metabolism and DNA recombination
ECs3470	0.925741	0.723966	0.613949	1.74939	4	tRNA (guanine-7-)-methyltransferase		Nucleotide metabolism and DNA recombination
ECs3942	0.755382	0.789027	0.602968	1.87265	4	hypothetical protein		Other category		Glycerolipid metabolism
ECs1753	0.862199	0.745838	0.634034	1.77237	4	hypothetical protein		Other category		Biosynthesis of unsaturated fatty acids
ECs0771	0.85127	0.634418	0.74052	1.78056	4	hypothetical protein		Unknown
ECs0915	0.787831	0.749361	0.711916	1.76381	4	hypothetical protein		Unknown
ECs1466	0.815609	0.63557	0.758636	1.79712	4	hypothetical protein		Unknown
ECs4207	0.844701	0.692423	0.827478	1.63976	4	hypothetical protein		Unknown
ECs4407	0.799366	0.736275	0.833177	1.6377	4	hypothetical protein		Unknown
ECs4535	0.808564	0.800441	0.723744	1.68038	4	hypothetical protein		Unknown
ECs0675	0.73218	0.629634	0.792785	1.85288	4	hypothetical protein		Unknown
ECs1137	0.731101	0.754948	0.75669	1.76979	4	hypothetical protein		Unknown
ECs1413	0.795501	0.600881	0.70837	1.9042	4	hypothetical protein		Unknown
ECs2339	0.754082	0.634637	0.724511	1.89701	4	hypothetical protein		Unknown
ECs2340	0.719324	0.635404	0.677112	1.98163	4	hypothetical protein		Unknown
ECs2516	0.754058	0.654846	0.71704	1.88518	4	hypothetical protein		Unknown
ECs2653	0.738128	0.728332	0.706179	1.84138	4	hypothetical protein		Unknown
ECs3379	0.763073	0.635874	0.801443	1.80599	4	hypothetical protein		Unknown
ECs3900	0.763837	0.709274	0.753533	1.78392	4	hypothetical protein		Unknown
ECs2144	1.00389	0.908706	0.499843	1.60872	4	hypothetical protein		Unknown
ECs2335	1.02656	0.720957	0.581079	1.68312	4	hypothetical protein		Unknown
ECs3977	0.988346	0.771278	0.523979	1.73321	4	hypothetical protein		Unknown
ECs3978	0.963518	0.844817	0.488959	1.72381	4	hypothetical protein		Unknown
ECs3993	0.962408	0.723019	0.663333	1.66091	4	hypothetical protein		Unknown
ECs0005	0.799309	0.765933	0.583287	1.8706	4	hypothetical protein		Unknown
ECs0085	0.894566	0.792285	0.631215	1.69684	4	hypothetical protein		Unknown
ECs0896	0.883846	0.800494	0.695778	1.63225	4	hypothetical protein		Unknown
ECs1464	0.871495	0.767569	0.728194	1.64305	4	hypothetical protein		Unknown
ECs1674	0.930024	0.704861	0.637217	1.73922	4	hypothetical protein		Unknown
ECs2336	0.858431	0.611924	0.732215	1.8038	4	hypothetical protein		Unknown
ECs3066	0.859072	0.978805	0.514067	1.67442	4	hypothetical protein		Unknown
ECs3068	0.840944	0.867011	0.627405	1.68319	4	hypothetical protein		Unknown
ECs3270	0.792701	0.698938	0.578805	1.94731	4	hypothetical protein		Unknown
ECs3816	0.91132	0.559949	0.699398	1.83441	4	hypothetical protein		Unknown
ECs3838	0.805421	0.847834	0.583729	1.78412	4	hypothetical protein		Unknown
ECs3925	0.921185	0.789827	0.592986	1.71191	4	hypothetical protein		Unknown
ECs3938	0.929487	0.695232	0.638322	1.74799	4	hypothetical protein		Unknown
ECs4069	0.899678	0.70802	0.572894	1.83471	4	hypothetical protein		Unknown
ECs4335	0.877747	1.07354	0.441203	1.6393	4	hypothetical protein		Unknown
ECs2341	0.697513	0.547549	0.618701	2.15076	4	hypothetical protein		Unknown
ECs5729	0.709212	0.550582	0.71767	2.03212	4	#N/A		Unknown
ECs5774	0.73231	0.646772	0.30062	2.35152	4	#N/A		Unknown
ECs2429	0.909795	1.08339	1.41577	0.576075	5	6-phosphofructokinase II	antibiotics biosynthesis	Stress response	antibiotics biosynthesis	Biosynthesis of antibiotics
ECs4702	0.963963	0.921328	1.33142	0.766531	5	acetolactate synthase II large subunit	antibiotics biosynthesis	Stress response	antibiotics biosynthesis	Biosynthesis of antibiotics
ECs1849	0.781128	1.25629	1.48229	0.470326	5	aconitate hydrase 1	antibiotics biosynthesis	Stress response	antibiotics biosynthesis	Biosynthesis of antibiotics
ECs5192	0.843925	1.16751	1.50972	0.463479	5	ammonium transport system structural protein	antibiotics biosynthesis	Stress response	antibiotics biosynthesis	Biosynthesis of antibiotics
ECs3639	0.921688	1.03517	1.42268	0.603569	5	enolase	antibiotics biosynthesis	Stress response	antibiotics biosynthesis	Biosynthesis of antibiotics
ECs5007	1.0226	0.796737	1.27069	0.89117	5	lysine sensitive aspartokinase III	antibiotics biosynthesis	Stress response	antibiotics biosynthesis	Biosynthesis of antibiotics
ECs4760	0.886347	1.08638	1.34246	0.67404	5	putative enzyme	antibiotics biosynthesis	Stress response	antibiotics biosynthesis	Biosynthesis of antibiotics
ECs3326	0.837409	1.25075	1.22965	0.682464	5	transaldolase A	antibiotics biosynthesis	Stress response	antibiotics biosynthesis	Biosynthesis of antibiotics
ECs3327	0.821578	1.18536	1.36633	0.619253	5	transketolase 2 isozyme	antibiotics biosynthesis	Stress response	antibiotics biosynthesis	Biosynthesis of antibiotics
ECs2071	0.973633	0.871537	1.83734	0.275198	5	cryptic nitrate reductase 2 alpha subunit	two-component system	Pathogenicity	two-component system	Two-component system
ECs2070	1.02292	0.911753	1.73476	0.29282	5	cryptic nitrate reductase 2 beta subunit	two-component system	Pathogenicity	two-component system	Two-component system
ECs2069	0.92756	0.922725	1.83223	0.278065	5	cryptic nitrate reductase 2 delta subunit	two-component system	Pathogenicity	two-component system	Two-component system
ECs2068	0.971133	0.9259	1.70654	0.36183	5	cryptic nitrate reductase 2 gamma subunit	two-component system	Pathogenicity	two-component system	Two-component system
ECs3553	0.946053	0.968152	1.52723	0.534276	5	carbon storage regulator	biofilm formation	Pathogenicity	biofilm formation	Biofilm formation - Escherichia coli
ECs3289	0.899551	1.16938	1.2795	0.645609	5	glucose-specific PTS system IIA component	biofilm formation	Pathogenicity	biofilm formation	Biofilm formation - Escherichia coli
ECs2533	0.96845	0.777677	1.39873	0.831275	5	cold shock protein	cold shock protein	Stress response
ECs3595	0.820902	1.1024	1.38936	0.676595	5	sigma factor RpoS	pathogenicity	Pathogenicity	sigma-related	Biofilm formation - Escherichia coli
ECs2198	0.979207	0.904558	1.32718	0.771625	5	MokW	pathogenicity	Other category
ECs1245	0.854663	0.784395	1.64971	0.678833	5	MokW protein	pathogenicity	Other category
ECs1176	0.808032	0.639775	1.78421	0.726699	5	host-nuclease inhibitor protein Gam	pathogenicity	Pathogenicity
ECs1812	1.05958	1.21071	1.21417	0.509297	5	hypothetical protein	pathogenicity	Pathogenicity		Pathogenic Escherichia coli infection
ECs1177	0.884301	0.594077	1.89344	0.578393	5	Kil protein	pathogenicity	Pathogenicity
ECs0507	0.811085	1.15794	1.30005	0.726145	5	glycoprotein/polysaccharide metabolism	polysaccharide	Carbohydrate metabolism
ECs2419	0.897541	0.906009	1.59498	0.573675	5	integration host factor IHF alpha subunit	prophage	Pathogenicity	prophage
ECs3001	0.99225	1.05539	1.2227	0.720801	5	recombination protein Bet	prophage	Nucleotide metabolism and DNA recombination	prophage
ECs1175	0.909036	0.835262	1.62726	0.596931	5	recombination protein Bet	prophage	Nucleotide metabolism and DNA recombination	prophage
ECs2098	0.844105	1.35789	1.24257	0.557736	5	glutamate decarboxylase isozyme	quorum sensing	Pathogenicity	quorum sensing	Quorum sensing
ECs0645	1.10646	0.870029	1.42493	0.572076	5	alkyl hydroperoxide reductase F52a subunit	SOS response	Other category	SOS response
ECs0929	0.715373	0.843809	2.19453	0.193549	5	glutaredoxin1 redox coenzyme for glutathione-dependent ribonucleotide reductase	SOS response	Nucleotide metabolism and DNA recombination
ECs4871	1.08128	1.08976	1.22346	0.595034	5	hydroperoxidase HPI(I)	SOS response	Amino acid and protein metabolism	SOS response	Phenylalanine metabolism
ECs2365	1.03206	0.969657	1.21862	0.767623	5	superoxide dismutase	SOS response	Stress response	SOS response
ECs2086	0.850323	1.11611	1.39782	0.624148	5	osmotically inducible protein	stress response	Stress response
ECs0890	1.03547	1.21158	1.36069	0.379784	5	global regulator protein Dps	stress response	Stress response
ECs1266	0.829022	1.1527	1.58452	0.414879	5	ATP-binding pho regulon component PhoH	stress response	Transcription and RNA processing	transcriptional regulation
ECs1008	0.964951	1.2365	1.23045	0.564411	5	putative amidase	stress response	Stress response
ECs0473	1.00394	1.15104	1.22195	0.616442	5	putative NAD(P)H-dependent xylose reductase	carbohydrate metabolism	Carbohydrate metabolism
ECs2604	0.806553	1.26435	1.32005	0.606258	5	trehalose-6-phosphate synthase	carbohydrate metabolism	Carbohydrate metabolism		Starch and sucrose metabolism
ECs0397	0.866756	1.39858	1.27246	0.463542	5	beta-D-galactosidase	carbohydrate metabolism	Carbohydrate metabolism		Galactose metabolism
ECs2693	0.820551	1.17524	1.41612	0.578018	5	hypothetical protein	carbohydrate metabolism	Carbohydrate metabolism		Fructose and mannose metabolism
ECs4475	1.07579	0.798988	1.41828	0.679731	5	mannitol-specific PTS system enzyme IIABC components	carbohydrate metabolism	Carbohydrate metabolism		Phosphotransferase system (PTS
ECs3188	0.995276	0.762869	1.25741	0.966135	5	putative sugar nucleotide epimerase	carbohydrate metabolism	Carbohydrate metabolism
ECs2445	0.79323	1.12002	1.39632	0.680597	5	activator of ntrL gene	outer membrane protein	Pathogenicity	outer membrane protein
ECs5130	0.93584	1.03117	1.35699	0.661717	5	outer membrane lipoprotein lipocalin	outer membrane protein	Pathogenicity	outer membrane protein
ECs4477	1.0208	1.23412	1.25786	0.480615	5	repressor for mtl	repressor	Transcription and RNA processing	transcriptional regulation
ECs1037	0.985222	1.21248	1.2845	0.510344	5	ribosome modulation factor	ribosome	Transcription and RNA processing	ribosome
ECs4396	0.977038	1.04941	1.3972	0.559499	5	putative ARAC-type regulatory protein	TF	Transcription and RNA processing	transcriptional regulation
ECs2817	0.945511	1.15208	1.23905	0.657577	5	putative transcriptional regulator LYSR-type	TF	Transcription and RNA processing	transcriptional regulation
ECs2783	1.05848	0.8834	1.2623	0.778702	5	transcriptional regulator cys regulon	TF	Transcription and RNA processing	transcriptional regulation
ECs4423	1.0354	0.819796	1.2734	0.852728	5	dipeptide transport system permease protein 1	transport	Transport		ABC transporters
ECs4422	1.01604	0.771478	1.3211	0.869708	5	dipeptide transport system permease protein 2	transport	Transport		ABC transporters
ECs3541	0.814998	1.12454	1.50141	0.543753	5	high-affinity glycine betaine / proline transport system protein	transport	Transport		ABC transporters
ECs2389	0.948712	1.21596	1.3664	0.458712	5	putative ATP-binding component of a transport system	transport	Transport
ECs1722	0.945097	1.05625	1.44379	0.536872	5	cation transport regulator	transport	Transport
ECs3271	0.908621	1.00856	1.48087	0.581956	5	high affinity manganese transport protein	transport	Transport
ECs5300	0.764473	1.33387	1.31291	0.589306	5	putative transport protein	transport	Transport
ECs3698	1.01656	1.12315	1.3595	0.486567	5	low-affinity L-arabinose transport system proton symport protein	transport	Transport
ECs2619	1.04137	0.948614	1.25863	0.73664	5	putative membrane protein		Other category
ECs1878	0.702718	1.42142	1.34065	0.538486	5	probable oxidoreductase		Amino acid and protein metabolism		Arginine and proline metabolism
ECs5241	0.995962	1.03121	1.45045	0.501993	5	putative oxidoreductase		Other category
ECs5033	1.01014	1.15286	1.2248	0.605308	5	quinone oxidoreductase		Other category
ECs0387	0.955712	1.47019	1.48233	0.0825794	5	hypothetical protein		Other category		Propanoate metabolism
ECs0386	0.964974	1.54335	1.41433	0.0730612	5	putative citrate synthase		Other category		Propanoate metabolism
ECs0388	0.861498	1.06404	1.91323	0.123553	5	putative propionyl-CoA synthetase		Other category		Propanoate metabolism
ECs5215	0.760945	1.24337	1.44542	0.542267	5	anaerobic ribonucleoside-triphosphate reductase		Nucleotide metabolism and DNA recombination		Purine metabolism
ECs1253	0.820658	1.23457	1.51007	0.421745	5	hypothetical protein		Nucleotide metabolism and DNA recombination		Pyrimidine metabolism
ECs2548	0.908605	1.25921	1.27973	0.548609	5	phosphoprotein phosphatase 1		Other category
ECs3955	0.921946	1.17359	1.45208	0.437734	5	probable ornithine aminotransferase		Amino acid and protein metabolism		Arginine and proline metabolism
ECs2384	0.748091	1.28258	1.48629	0.47449	5	murein lipoprotein		Other category
ECs1442	0.956782	1.22103	1.35198	0.460581	5	glutaredoxin 2		Other category
ECs0619	0.982245	1.08709	1.32356	0.594584	5	hypothetical protein		Amino acid and protein metabolism		Glutathione metabolism
ECs3931	0.961363	0.951294	1.36288	0.707074	5	glycogen biosynthesis protein GlgS		Other category
ECs1772	0.879618	1.42497	1.43725	0.252035	5	putative colonization factor		Other category
ECs1155	0.974103	1.04613	1.38817	0.57516	5	curved DNA-binding protein		Nucleotide metabolism and DNA recombination
ECs2014	0.996643	1.25428	1.2189	0.526622	5	acyl carrier protein phosphodiesterase		Other category
ECs2370	1.07027	1.11386	1.23796	0.567699	5	cyclopropane fatty acyl phospholipid synthase		Other category
ECs0395	0.854121	1.4131	1.28234	0.452045	5	thiogalactoside acetyltransferase		Other category
ECs1181	1.08009	0.737805	1.55878	0.587722	5	putative anti-termination protein N		Nucleotide metabolism and DNA recombination
ECs2709	0.749682	1.40491	1.53674	0.300921	5	putative reductase		Other category
ECs0968	0.8793	1.07094	1.34714	0.691419	5	ATP-binding component of serine protease		Amino acid and protein metabolism
ECs1683	0.871775	1.20211	1.57325	0.334626	5	putative sporulation protein		Other category
ECs2072	1.0794	0.814783	1.67218	0.39472	5	nitrite extrusion protein 2		Other category		Nitrogen metabolism
ECs0358	0.684764	1.07566	1.3902	0.841676	5	NAD+-dependent betaine aldehyde dehydrogenase		Amino acid and protein metabolism		Glycine, serine and threonine metabolism
ECs1779	1.05385	0.907318	1.225	0.799234	5	hypothetical lipoprotein		Other category
ECs0439	0.765203	1.06592	1.45937	0.696044	5	hypothetical protein		Unknown
ECs0509	0.928594	1.14734	1.30644	0.608995	5	hypothetical protein		Unknown
ECs1154	0.926861	1.10079	1.46335	0.49176	5	hypothetical protein		Unknown
ECs1711	0.77841	1.19357	1.43316	0.58564	5	hypothetical protein		Unknown
ECs1956	0.844105	1.2412	1.23271	0.681678	5	hypothetical protein		Unknown
ECs2382	0.814034	1.03456	1.55317	0.578137	5	hypothetical protein		Unknown
ECs2385	0.920618	1.1794	1.47243	0.412129	5	hypothetical protein		Unknown
ECs2388	0.920117	1.32204	1.32994	0.423004	5	hypothetical protein		Unknown
ECs2390	0.900672	1.25623	1.4537	0.377462	5	hypothetical protein		Unknown
ECs2391	0.921988	1.24857	1.43651	0.38101	5	hypothetical protein		Unknown
ECs3005	0.818183	1.21204	1.27564	0.691747	5	hypothetical protein		Unknown
ECs3154	0.925634	1.07824	1.41664	0.563904	5	hypothetical protein		Unknown
ECs3616	0.814239	1.28706	1.30011	0.597134	5	hypothetical protein		Unknown
ECs3981	0.845581	0.939843	1.48615	0.708124	5	hypothetical protein		Unknown
ECs3982	0.833128	1.08547	1.42603	0.642108	5	hypothetical protein		Unknown
ECs4213	0.885768	1.2149	1.26668	0.628883	5	hypothetical protein		Unknown
ECs5028	0.814112	1.31495	1.24798	0.624707	5	hypothetical protein		Unknown
ECs5195	0.82939	1.14395	1.48892	0.52315	5	hypothetical protein		Unknown
ECs0259	0.972516	1.15254	1.21824	0.651164	5	hypothetical protein		Unknown
ECs0864	1.07941	1.01229	1.32076	0.570476	5	hypothetical protein		Unknown
ECs0869	1.04798	0.896042	1.37688	0.657179	5	hypothetical protein		Unknown
ECs1049	1.0853	0.980571	1.34884	0.565889	5	hypothetical protein		Unknown
ECs1077	1.10439	0.949282	1.27388	0.655244	5	hypothetical protein		Unknown
ECs1211	1.10139	0.824589	1.22977	0.825922	5	hypothetical protein		Unknown
ECs1692	0.975147	1.10985	1.37433	0.526551	5	hypothetical protein		Unknown
ECs2282	1.04013	0.925859	1.23593	0.78384	5	hypothetical protein		Unknown
ECs2431	0.970969	1.20561	1.2503	0.567507	5	hypothetical protein		Unknown
ECs2504	1.11042	0.795343	1.51386	0.54758	5	hypothetical protein		Unknown
ECs2505	1.25046	0.399564	1.54931	0.751847	5	hypothetical protein		Unknown
ECs2918	0.978962	0.967865	1.33053	0.706735	5	hypothetical protein		Unknown
ECs3238	1.18002	0.766693	1.2855	0.743115	5	hypothetical protein		Unknown
ECs3781	1.00677	0.717368	1.55651	0.685357	5	hypothetical protein		Unknown
ECs3988	1.03342	1.19537	1.22212	0.542812	5	hypothetical protein		Unknown
ECs3989	0.98959	1.12714	1.44354	0.422375	5	hypothetical protein		Unknown
ECs4847	1.08259	0.914554	1.34079	0.641386	5	hypothetical protein		Unknown
ECs5050	1.04568	1.13967	1.54191	0.249509	5	hypothetical protein		Unknown
ECs5187	1.09868	0.710921	1.39518	0.766138	5	hypothetical protein		Unknown
ECs5299	0.947727	1.11789	1.36653	0.555071	5	hypothetical protein		Unknown
ECs1710	0.788845	0.627221	2.16401	0.360864	5	hypothetical protein		Unknown
ECs2031	1.03522	0.767379	1.78513	0.367982	5	hypothetical protein		Unknown
ECs2493	0.994453	1.16626	1.6149	0.199828	5	hypothetical protein		Unknown
ECs2692	0.689961	0.992513	2.0448	0.231707	5	hypothetical protein		Unknown
ECs2888	1.02109	0.929491	1.69794	0.315994	5	hypothetical protein		Unknown
ECs3022	0.759078	0.900005	1.93289	0.367934	5	hypothetical protein		Unknown
ECs3533	0.990875	0.828004	1.64622	0.500023	5	hypothetical protein		Unknown
ECs4366	0.996221	0.980583	1.68265	0.307827	5	hypothetical protein		Unknown
ECs5737	0.808136	1.20469	1.45465	0.521746	5	#N/A		Unknown
ECs5775	0.857504	1.31263	1.34119	0.484749	5	#N/A		Unknown
ECs5391	0.961887	0.880496	1.37	0.768012	5	#N/A		Unknown
ECs5719	0.995525	1.07158	1.23368	0.690174	5	#N/A		Unknown
ECs5777	0.742673	0.925841	1.78921	0.510122	5	#N/A		Unknown
ECs2124	1.12688	1.38981	1.3368	0.137331	6	hypothetical protein	quorum sensing	Pathogenicity	quorum sensing	Quorum sensing
ECs2125	1.07062	1.24841	1.53593	0.124263	6	hypothetical protein	quorum sensing	Pathogenicity	quorum sensing	Quorum sensing
ECs2045	1.23455	1.14008	1.34695	0.259159	6	putative ATP-binding component of a transport system	quorum sensing	Pathogenicity	quorum sensing	Quorum sensing
ECs2120	1.18683	1.3818	1.17471	0.253265	6	putative ATP-binding component of a transport system	quorum sensing	Pathogenicity	quorum sensing	Quorum sensing
ECs2091	1.11992	1.49666	1.00377	0.389239	6	putative hemin-binding lipoprotein	quorum sensing	Pathogenicity	quorum sensing	Quorum sensing
ECs2118	1.40105	1.13562	1.12877	0.320883	6	putative kinase	quorum sensing	Pathogenicity	quorum sensing	Quorum sensing
ECs2123	1.2214	1.31349	1.28543	0.168284	6	putative LACI-type transcriptional regulator	quorum sensing	Pathogenicity	quorum sensing	Quorum sensing
ECs5205	1.47643	0.895913	0.938861	0.675683	6	putative LACI-type transcriptional regulator	quorum sensing	Pathogenicity	quorum sensing
ECs2044	1.33758	1.30151	1.05312	0.303844	6	putative transport protein	quorum sensing	Pathogenicity	quorum sensing	Quorum sensing
ECs2046	1.29507	1.11587	1.23045	0.342562	6	putative transport system permease protein	quorum sensing	Pathogenicity	quorum sensing	Quorum sensing
ECs2121	1.14739	1.05907	1.45117	0.318477	6	putative transport system permease protein	quorum sensing	Pathogenicity	quorum sensing	Quorum sensing
ECs2122	1.19244	1.03631	1.48826	0.255472	6	putative transport system permease protein	quorum sensing	Pathogenicity	quorum sensing	Quorum sensing
ECs2047	1.38231	1.28889	1.0111	0.314158	6	putative transport system permease protein	quorum sensing	Pathogenicity	quorum sensing	Quorum sensing
ECs4448	1.44112	1.04911	1.21075	0.27807	6	D-xylose isomerase	xylose	Carbohydrate metabolism		Fructose and mannose metabolism
ECs4450	1.52562	1.25432	0.935325	0.279884	6	putative ATP-binding protein of xylose transport system	xylose	Transport		ABC transporters
ECs4451	1.53684	1.10795	1.01209	0.330468	6	putative membrane component of xylose transport system	xylose	Transport		ABC transporters
ECs4449	1.48065	1.12823	1.15229	0.221639	6	xylose binding protein transport system	xylose	Transport		ABC transporters
ECs5014	1.39636	1.04278	1.19127	0.350647	6	xylose-proton symport	xylose	Transport
ECs4447	1.38412	1.20423	1.08458	0.317764	6	xylulokinase	xylose	Carbohydrate metabolism		Pentose and glucuronate interconversions
ECs3241	1.17597	1.36769	1.22885	0.221479	6	sucrose transport protein	carbohydrate metabolism	Transport
ECs3663	1.34593	1.2494	0.882469	0.524728	6	L-fuculokinase	carbohydrate metabolism	Carbohydrate metabolism		Fructose and mannose metabolism
ECs3242	1.15662	1.50562	1.09472	0.247554	6	putative fructokinase	carbohydrate metabolism	Carbohydrate metabolism		Starch and sucrose metabolism
ECs3662	1.22236	0.836703	1.5556	0.348541	6	L-fucose isomerase	carbohydrate metabolism	Carbohydrate metabolism		Fructose and mannose metabolism
ECs1158	1.08169	1.17619	1.23906	0.494127	6	periplasmic glucose-1-phosphatase	carbohydrate metabolism	Carbohydrate metabolism		Glycolysis / Gluconeogenesis
ECs0066	1.39647	0.974091	1.11549	0.496767	6	L-arabinose isomerase	carbohydrate metabolism	Carbohydrate metabolism		Pentose and glucuronate interconversions
ECs0067	1.38811	0.945598	1.02715	0.625624	6	L-ribulokinase	carbohydrate metabolism	Carbohydrate metabolism		Pentose and glucuronate interconversions
ECs4583	1.34567	1.06762	0.908419	0.674792	6	type III secretion system EscR protein	T3SS	Pathogenicity	T3SS	Bacterial secretion system
ECs5051	1.07393	1.18047	1.42779	0.300269	6	acetyl-CoA synthetase	antibiotics biosynthesis	Stress response	antibiotics biosynthesis	Biosynthesis of antibiotics
ECs2454	1.3135	1.24166	0.985771	0.457396	6	acetylornithine delta-aminotransferase	antibiotics biosynthesis	Stress response	antibiotics biosynthesis	Arginine and proline metabolism
ECs1419	1.40552	1.00547	1.08442	0.489462	6	minor curlin subunit precursor CsgB	biofilm formation	Pathogenicity	biofilm formation	Biofilm formation - Escherichia coli
ECs2119	1.34814	1.26227	0.84151	0.552826	6	putative SORC-type transcriptional regulator	biofilm formation	Pathogenicity	biofilm formation	Biofilm formation - Escherichia coli
ECs4424	1.10342	1.24804	1.21533	0.426691	6	dipeptide transport protein	chemotaxis	Stress response	chemotaxis	Bacterial chemotaxis
ECs4431	1.14717	1.41575	1.12263	0.31553	6	putative fimbrial major protein precursor	fimbrial	Cell motility	cell motility
ECs3461	1.31577	0.984056	1.20315	0.478199	6	leader peptide of chorismate mutase-P-prephenate dehydratase	pathogenicity	Pathogenicity
ECs1883	1.43989	0.726062	1.03685	0.775986	6	phage shock protein	phage shock protein	Stress response	prophage
ECs0966	1.12351	1.17372	1.22381	0.469519	6	cold shock protein	cold shock protein	Stress response
ECs5045	1.07811	1.28697	1.13596	0.497931	6	redox-sensing activator of soxS	SOS response	Stress response
ECs2811	1.16145	1.2256	1.08528	0.525091	6	SbmC protein	SOS response	Stress response	SOS response
ECs4432	1.12569	1.39192	1.3114	0.163109	6	putative resistance protein	stress response	Stress response
ECs2584	1.10544	1.20483	1.30254	0.375343	6	copper homeostasis protein	stress response	Stress response
ECs3524	1.14197	1.19202	1.32847	0.323109	6	transport permease protein of gamma-aminobutyrate	transport	Transport
ECs5206	1.38827	0.902945	1.00599	0.689149	6	putative ATP-binding component of a transport system	transport	Transport
ECs2608	1.40861	1.07774	0.870307	0.640169	6	ATP-binding component of high-affinity L-arabinose transport system	transport	Transport		ABC transporters
ECs2609	1.47049	1.08546	0.945935	0.489845	6	L-arabinose-binding periplasmic protein	transport	Transport		ABC transporters
ECs5049	1.14854	1.13077	1.39519	0.30611	6	putative transport protein	transport	Transport
ECs4473	1.32655	1.2187	0.864584	0.593262	6	putative membrane protein		Other category
ECs2048	1.23008	1.13276	1.29492	0.325391	6	putative aldehyde dehydrogenase		Amino acid and protein metabolism		Arginine and proline metabolism
ECs2452	1.37231	1.10631	1.22585	0.27729	6	putative aldehyde dehydrogenase		Amino acid and protein metabolism		Arginine and proline metabolism
ECs3522	1.19134	1.01627	1.48405	0.280532	6	succinate-semialdehyde dehydrogenase		Amino acid and protein metabolism		Alanine, aspartate and glutamate metabolism
ECs4464	1.03562	1.28362	1.44601	0.220132	6	aldehyde dehydrogenase B		Amino acid and protein metabolism		Pyruvate metabolism
ECs3445	1.35413	1.03411	1.20191	0.39135	6	putative formate acetyltransferase		Other category
ECs3523	1.31093	1.04048	1.36163	0.262267	6	4-aminobutyrate aminotransferase activity		Other category		Propanoate metabolism
ECs3896	1.12274	1.40182	1.14343	0.332418	6	2,5-diketo-D-gluconate reductase		Other category
ECs2126	1.09221	1.27975	1.20614	0.416965	6	putative enzyme		Other category
ECs1059	1.0692	1.41093	1.17354	0.347036	6	putative division inhibition protein		Cell division
ECs0344	1.09024	1.39075	1.03809	0.486917	6	putative dehydrogenase subunit		Other category
ECs4217	1.1805	1.06259	1.1951	0.5492	6	nitrite reductase (NAD(P)H) subunit		Other category		Nitrogen metabolism
ECs2768	1.19368	1.39764	1.04365	0.368068	6	putative cell division inhibition protein		Cell division
ECs2450	1.52053	1.08914	1.05988	0.315487	6	hypothetical protein		Amino acid and protein metabolism		Arginine and proline metabolism
ECs2451	1.48417	1.07296	1.11931	0.306369	6	hypothetical protein		Amino acid and protein metabolism		Arginine and proline metabolism
ECs2453	1.30609	1.15443	1.22991	0.294248	6	hypothetical protein		Amino acid and protein metabolism		Arginine and proline metabolism
ECs2492	1.09483	1.28725	1.34859	0.257778	6	hypothetical protein		Unknown
ECs3401	1.10136	1.32294	1.10825	0.468028	6	hypothetical protein		Unknown
ECs3521	1.25131	1.11677	1.36534	0.245379	6	hypothetical protein		Unknown
ECs4112	1.15266	1.43351	0.965957	0.456688	6	hypothetical protein		Unknown
ECs4747	1.09421	1.13506	1.34773	0.407483	6	hypothetical protein		Unknown
ECs5175	1.17096	1.61516	0.946615	0.281275	6	hypothetical protein		Unknown
ECs5285	1.19911	1.23152	1.20606	0.354126	6	hypothetical protein		Unknown
ECs0728	1.46498	0.762584	1.48117	0.249285	6	hypothetical protein		Unknown
ECs1079	1.34027	0.712352	1.27949	0.637604	6	hypothetical protein		Unknown
ECs1939	1.36331	1.39403	0.985052	0.258607	6	hypothetical protein		Unknown
ECs1940	1.46	1.31216	0.875405	0.353774	6	hypothetical protein		Unknown
ECs2769	1.3063	1.34698	0.973899	0.374692	6	hypothetical protein		Unknown
ECs3520	1.55232	1.19314	1.0576	0.183943	6	hypothetical protein		Unknown
ECs3906	1.70972	0.688934	1.20769	0.355859	6	hypothetical protein		Unknown
ECs4474	1.37626	1.10421	0.882407	0.634975	6	hypothetical protein		Unknown
ECs5108	1.37138	1.32035	0.780997	0.535766	6	hypothetical protein		Unknown
ECs5194	1.38877	1.05102	0.909658	0.645362	6	hypothetical protein		Unknown
ECs5726	1.23616	1.55318	0.985887	0.233477	6	#N/A		Unknown
ECs5761	1.43349	1.46908	0.713675	0.397627	6	#N/A		Unknown
ECs5763	1.36376	0.892225	1.07666	0.65076	6	#N/A		Unknown
ECs0752	0.849484	0.84553	1.30508	0.985574	7	2-oxoglutarate dehydrogenase dihydrolipoyltranssuccinase E2 component	antibiotics biosynthesis	Stress response	antibiotics biosynthesis	Biosynthesis of antibiotics
ECs4612	0.882453	1.11401	1.21929	0.780151	7	acetolactate synthase I large subunit	antibiotics biosynthesis	Stress response	antibiotics biosynthesis	Biosynthesis of antibiotics
ECs0122	0.875619	1.01843	1.30529	0.790151	7	aconitate hydrase B	antibiotics biosynthesis	Stress response	antibiotics biosynthesis	Biosynthesis of antibiotics
ECs3695	0.801915	0.584725	1.53682	1.04568	7	diaminopimelate decarboxylase	antibiotics biosynthesis	Stress response	antibiotics biosynthesis	Biosynthesis of antibiotics
ECs4109	0.939973	1.09084	1.26173	0.699144	7	malate dehydrogenase	antibiotics biosynthesis	Stress response	antibiotics biosynthesis	Biosynthesis of antibiotics
ECs2000	0.763117	1.09857	1.32547	0.806631	7	putative oxidoreductase	antibiotics biosynthesis	Stress response	antibiotics biosynthesis	Biosynthesis of antibiotics
ECs2383	0.892671	1.07265	1.30029	0.725084	7	pyruvate kinase I	antibiotics biosynthesis	Stress response	antibiotics biosynthesis	Biosynthesis of antibiotics
ECs5036	0.867601	0.994056	1.2469	0.883287	7	tyrosine aminotransferase	antibiotics biosynthesis	Stress response	antibiotics biosynthesis	Biosynthesis of antibiotics
ECs2333	0.973093	0.851463	1.25799	0.902073	7	beta-lactam resistance protein	antibiotics resistance	Stress response	antibiotics resistance
ECs1729	0.834315	0.723498	1.33928	1.08416	7	nitrate reductase 1 alpha subunit	two-component system	Stress response	two-component system	Two-component system
ECs1730	0.924073	0.725399	1.20333	1.13243	7	nitrate reductase 1 beta subunit	two-component system	Stress response	two-component system	Two-component system
ECs1732	0.989179	0.661165	1.25221	1.07686	7	nitrate reductase 1 gamma subunit	two-component system	Stress response	two-component system	Two-component system
ECs2707	0.933954	1.12825	1.24837	0.682893	7	putative 2-component transcriptional regulator	two-component system	Pathogenicity	two-component system
ECs4274	0.930456	1.0235	1.23805	0.799279	7	glycogen synthase	biofilm formation	Pathogenicity	biofilm formation	Biofilm formation - Escherichia coli
ECs0744	0.889766	1.19467	1.21653	0.696989	7	putative fimbrial-like protein	fimbrial	Cell motility	cell motility
ECs4487	0.863226	0.880584	1.2666	0.977629	7	protein export protein SecB	quorum sensing	Pathogenicity	quorum sensing	Quorum sensing
ECs4310	0.82372	1.02126	1.22615	0.923638	7	RNA polymerase sigma32 factor	pathogenicity	Pathogenicity	sigma-related
ECs4199	0.872117	0.991747	1.22062	0.908412	7	host factor for lysis of phiX174 infection	pathogenicity	Pathogenicity
ECs3000	0.93588	0.887527	1.43475	0.72008	7	putative host-nuclease inhibitor protein Gam	pathogenicity	Pathogenicity
ECs4441	0.988948	0.649824	1.2008	1.14199	7	cold shock protein 7.4	cold shock protein	Stress response
ECs4714	0.800675	0.971247	1.31882	0.898954	7	thioredoxin 1	stress response	Other category	thiol stress response
ECs1856	0.834655	0.858702	1.2437	1.05228	7	osmotically inducible lipoprotein	stress response	Stress response
ECs0100	0.80925	0.968478	1.32027	0.891314	7	UDP-3-O-acyl N-acetylglucosamine deacetylase	lipopolysaccharide	Carbohydrate metabolism	lipopolysaccharide	Lipopolysaccharide biosynthesis
ECs3877	0.798046	0.882931	1.25309	1.05648	7	hydrogenase-2 operon protein HybE	operon	Transcription and RNA processing	transcriptional regulation
ECs3876	0.864203	0.968911	1.22942	0.92956	7	hydrogenase-2 operon protein HybF	operon	Transcription and RNA processing	transcriptional regulation
ECs4613	0.879904	0.910358	1.3474	0.84687	7	ilvB operon leader peptide protein	operon	Pathogenicity
ECs2515	0.908109	0.936712	1.43784	0.697498	7	putative outer membrane protein	outer membrane protein	Pathogenicity	outer membrane protein
ECs0567	0.903742	0.948338	1.2957	0.839534	7	repressor of allantoin regulon	repressor	Transcription and RNA processing	transcriptional regulation
ECs2603	0.90444	0.949695	1.25214	0.883123	7	putative regulator	TF	Transcription and RNA processing	transcriptional regulation
ECs2988	0.930867	1.06181	1.25666	0.742077	7	regulatory protein CII	TF	Transcription and RNA processing	transcriptional regulation
ECs2655	0.957222	1.00558	1.2272	0.800587	7	putative ATP-binding component of a transport system	transport	Transport		ABC transporters
ECs5093	0.886143	1.16143	1.24703	0.701142	7	low-affinity transport system proline permease II	transport	Transport
ECs4368	0.882232	0.818257	1.33659	0.945469	7	putative transport protein	transport	Transport
ECs2417	0.877492	1.15566	1.22436	0.739384	7	vitamin B12 transport	transport	Transport		Glutathione metabolism
ECs2420	0.960152	0.963093	1.23793	0.827693	7	phenylalanine tRNA synthetase beta-subunit		Nucleotide metabolism and DNA recombination		Aminoacyl-tRNA biosynthesis
ECs5342	0.798008	0.888361	1.35631	0.943129	7	phosphopentomutase		Nucleotide metabolism and DNA recombination		Purine metabolism
ECs5343	0.835886	0.912041	1.22929	1.01418	7	purine-nucleoside phosphorylase		Nucleotide metabolism and DNA recombination		Purine metabolism
ECs4775	0.840728	1.04041	1.24848	0.864118	7	proline dipeptidase		Amino acid and protein metabolism
ECs3163	0.907667	0.977006	1.30121	0.801824	7	NADH dehydrogenase I chain K		Other category		Oxidative phosphorylation
ECs3160	0.900894	0.806029	1.37037	0.902809	7	NADH dehydrogenase I chain N		Other category		Oxidative phosphorylation
ECs0191	0.957109	1.04548	1.223	0.766254	7	inhibitor of Rho		Other category
ECs1715	0.83032	0.636495	1.29936	1.21478	7	glutamyl-tRNA reductase		Nucleotide metabolism and DNA recombination		Porphyrin and chlorophyll metabolism
ECs0969	0.938905	0.737695	1.15332	1.1576	7	protein chain initiation factor IF-1		Amino acid and protein metabolism
ECs3778	0.831849	0.996317	1.21538	0.950843	7	2-octaprenyl-6-methoxyphenol 4-monoxygenase		Other category		Ubiquinone and other terpenoid-quinone biosynthesis
ECs4277	0.869055	1.12212	1.24322	0.760966	7	1,4-alpha-glucan branching enzyme		Carbohydrate metabolism		Starch and sucrose metabolism
ECs3640	0.82947	0.890783	1.29616	0.971429	7	CTP synthetase		Nucleotide metabolism and DNA recombination		Pyrimidine metabolism
ECs0483	0.90114	0.949002	1.24947	0.889987	7	cytochrome o ubiquinol oxidase subunit IV		Other category		Oxidative phosphorylation
ECs3150	0.836484	0.847027	1.31512	0.986966	7	dihydroxynaphtoic acid synthetase		Other category		Ubiquinone and other terpenoid-quinone biosynthesis
ECs4200	0.790614	0.822961	1.29418	1.07947	7	FKBP-type peptidyl-prolyl cis-trans isomerase		Amino acid and protein metabolism
ECs4898	0.908218	1.0823	1.23154	0.771711	7	glutamate racemase		Amino acid and protein metabolism		D-Glutamine and D-glutamate metabolism
ECs2327	0.918321	1.07194	1.27976	0.720916	7	NAD-dependent 7alpha-hydroxysteroid dehydrogenase		Other category		Secondary bile acid biosynthesis
ECs0482	0.865529	0.979634	1.34891	0.792621	7	protoheme IX farnesyltransferase		Other category		Oxidative phosphorylation
ECs1263	0.869488	0.69442	1.34672	1.06853	7	putative cytochrome		Other category
ECs5041	0.804642	0.893823	1.34989	0.937719	7	ssDNA-binding protein		Nucleotide metabolism and DNA recombination		DNA replication
ECs5735	0.893008	1.01607	1.22692	0.856663	7	#N/A		Unknown
ECs0618	0.876931	1.00498	1.26098	0.84831	7	hypothetical protein		Unknown
ECs1050	0.943831	0.88716	1.25557	0.899928	7	hypothetical protein		Unknown
ECs1481	0.896584	0.86545	1.2465	0.979124	7	hypothetical protein		Unknown
ECs2081	0.844105	0.926061	1.32379	0.893107	7	hypothetical protein		Unknown
ECs2196	0.759617	0.902163	1.3658	0.959208	7	hypothetical protein		Unknown
ECs2691	0.887778	0.967454	1.38555	0.743228	7	hypothetical protein		Unknown
ECs2785	0.927393	1.15097	1.24642	0.669561	7	hypothetical protein		Unknown
ECs3137	0.853113	1.04551	1.24491	0.850162	7	hypothetical protein		Unknown
ECs4776	0.942308	0.864324	1.22037	0.960586	7	hypothetical protein		Unknown
ECs5039	0.931626	1.04765	1.33663	0.671323	7	hypothetical protein		Unknown
ECs5090	0.854638	0.924473	1.27284	0.937182	7	hypothetical protein		Unknown
ECs5164	0.820939	0.987749	1.40067	0.776339	7	hypothetical protein		Unknown
ECs4888	0.712539	1.09281	0.816087	1.39772	8	acetylglutamate kinase	antibiotics biosynthesis	Stress response	antibiotics biosynthesis	Biosynthesis of antibiotics
ECs1835	0.538923	1.06688	0.617187	1.80972	8	anthranilate synthase component II	antibiotics biosynthesis	Stress response	antibiotics biosynthesis	Biosynthesis of antibiotics
ECs1834	0.679858	1.14499	0.531851	1.67819	8	N-(5-phosphoribosyl)anthranilate isomerase/indole-3-glycerolphosphate synthetase	antibiotics biosynthesis	Stress response	antibiotics biosynthesis	Biosynthesis of antibiotics
ECs0584	0.724998	1.10979	0.616628	1.57727	8	phosphoribosylaminoimidazole carboxylase	antibiotics biosynthesis	Stress response	antibiotics biosynthesis	Biosynthesis of antibiotics
ECs0585	0.682147	0.872279	0.612868	1.8565	8	phosphoribosylaminoimidazole carboxylase	antibiotics biosynthesis	Stress response	antibiotics biosynthesis	Biosynthesis of antibiotics
ECs3361	0.705384	1.09283	0.530421	1.70424	8	phosphoribosylaminoimidazole synthetase	antibiotics biosynthesis	Stress response	antibiotics biosynthesis	Biosynthesis of antibiotics
ECs3423	0.76516	1.10695	0.61185	1.54377	8	phosphoribosylformyl-glycineamide synthetase	antibiotics biosynthesis	Stress response	antibiotics biosynthesis	Biosynthesis of antibiotics
ECs1832	0.689952	1.41513	0.566914	1.36808	8	tryptophan synthase alpha protein	antibiotics biosynthesis	Stress response	antibiotics biosynthesis	Biosynthesis of antibiotics
ECs1833	0.702844	1.36288	0.543944	1.42976	8	tryptophan synthase beta protein	antibiotics biosynthesis	Stress response	antibiotics biosynthesis	Biosynthesis of antibiotics
ECs1352	0.715576	1.20898	0.665287	1.43943	8	putative tellurium resistance protein TerA	tellurium resistance	Stress response	tellurium resistance
ECs1353	0.702573	1.37914	0.679671	1.27206	8	putative tellurium resistance protein TerB	tellurium resistance	Stress response	tellurium resistance
ECs1343	0.718402	1.02309	0.553606	1.73447	8	TerW protein	tellurium resistance	Stress response	tellurium resistance
ECs1139	0.739271	0.746012	0.558351	1.97782	8	putative function in exopolysaccharide production	biofilm formation	Pathogenicity	biofilm formation	Biofilm formation - Escherichia coli
ECs2109	0.762098	1.40011	0.369095	1.51574	8	putative fimbrial-like protein	fimbrial	Cell motility	cell motility
ECs4603	0.780653	0.918857	0.493129	1.83531	8	hexose phosphate transport protein	two-component system	Pathogenicity	two-component system	Two-component system
ECs1601	0.747474	0.882115	0.527152	1.86955	8	sensor protein PhoQ	two-component system	Pathogenicity	two-component system	Two-component system
ECs3819	0.714439	1.23419	0.806301	1.26836	8	galactose-proton symport of transport system	galactose	Transport
ECs4012	0.749296	0.853179	0.556757	1.86485	8	N-acetylgalactosamine-specific PTS system enzyme IIC component	galactose	Carbohydrate metabolism		Galactose metabolism
ECs4010	0.6511	0.824834	0.575075	1.97418	8	putative tagatose 6-phosphate kinase 2	galactose	Carbohydrate metabolism		Galactose metabolism
ECs2128	0.547951	0.741563	0.77226	1.95476	8	altronate oxidoreductase	pentose	Carbohydrate metabolism		Pentose and glucuronate interconversions
ECs3974	0.585494	0.769898	0.739047	1.92337	8	uronate isomerase	pentose	Carbohydrate metabolism		Pentose and glucuronate interconversions
ECs0410	0.664837	0.914929	0.785273	1.6522	8	putative esterase	carbon metabolism	Other category		Carbon metabolism
ECs2110	0.724656	1.52022	0.401166	1.40369	8	putative outer membrane protein	outer membrane protein	Pathogenicity	outer membrane protein
ECs5085	0.787831	1.45549	0.515438	1.2821	8	putative transcriptional regulator	TF	Transcription and RNA processing	transcriptional regulation
ECs4171	0.76184	0.943309	0.696848	1.61748	8	30S ribosomal subunit protein S8	30S ribosome	Transcription and RNA processing	ribosome	Ribosome
ECs0627	0.734004	1.04609	0.732338	1.50885	8	ATP-binding component of ferric enterobactin transport	transport	Transport		ABC transporters
ECs4042	0.790618	1.28555	0.468508	1.49384	8	tryptophan-specific transport protein	transport	Amino acid and protein metabolism
ECs5080	0.611249	1.03963	0.666514	1.71025	8	ATP-binding component of phosphonate transport	transport	Transport
ECs4330	0.780457	0.895286	0.609117	1.73698	8	hypothetical membrane protein		Other category
ECs4336	0.728248	1.04837	0.58474	1.66713	8	hypothetical membrane protein		Other category
ECs3197	0.683725	0.787152	0.662705	1.88556	8	membrane protein required for colicin V production		Other category
ECs0035	0.720484	0.911809	0.715647	1.67097	8	carbamoyl-phosphate synthetase small subunit		Nucleotide metabolism and DNA recombination		Pyrimidine metabolism
ECs1830	0.757197	1.30218	0.361052	1.62455	8	putative structural proteins		Cell division
ECs5082	0.73659	1.35237	0.597153	1.34958	8	phosphonate metabolism		Other category		Phosphonate and phosphinate metabolism
ECs5083	0.665053	1.13415	0.50205	1.73518	8	phosphonate metabolism		Other category		Phosphonate and phosphinate metabolism
ECs4339	0.735887	0.879691	0.552255	1.85753	8	putative beta-hydroxydecanoyl-ACP dehydrase		Other category
ECs4338	0.768616	1.0819	0.518581	1.66229	8	putative 3-oxoacyl-(acyl-carrier-protein) synthase II		Other category		Fatty acid metabolism
ECs4337	0.776246	0.941787	0.602607	1.70286	8	hypothetical lipoprotein		Other category
ECs4526	0.762707	0.970957	0.664844	1.62319	8	putative RNA methylase		Transcription and RNA processing	transcriptional regulation
ECs2636	0.780355	0.843547	0.577804	1.82026	8	putative transposase OrfB protein of insertion sequence IS629		Nucleotide metabolism and DNA recombination
ECs1342	0.691211	1.22402	0.641866	1.47436	8	hypothetical protein		Unknown
ECs1344	0.752796	0.949667	0.492515	1.83459	8	hypothetical protein		Unknown
ECs1831	0.594969	1.29795	0.557402	1.58976	8	hypothetical protein		Unknown
ECs2869	0.720702	1.58457	0.527606	1.21268	8	hypothetical protein		Unknown
ECs3328	0.799426	0.95669	0.592893	1.6747	8	hypothetical protein		Unknown
ECs3545	0.752576	1.09511	0.691982	1.48431	8	hypothetical protein		Unknown
ECs3737	0.69749	1.52176	0.632345	1.188	8	hypothetical protein		Unknown
ECs3847	0.755054	1.14931	0.660572	1.46188	8	hypothetical protein		Unknown
ECs4333	0.734684	1.12215	0.521574	1.65485	8	hypothetical protein		Unknown
ECs4334	0.691608	1.15868	0.472157	1.71531	8	hypothetical protein		Unknown
ECs2592	1.28289	1.03963	0.522403	1.17086	9	chemotaxis protein CheY	chemotaxis	Stress response	chemotaxis	Bacterial chemotaxis
ECs2596	1.14814	1.16281	0.531316	1.18009	9	methyl-accepting chemotaxis protein II	chemotaxis	Stress response	chemotaxis	Bacterial chemotaxis
ECs2597	1.27827	0.9639	0.531225	1.2401	9	positive regulator of CheA protein activity	chemotaxis	Stress response	chemotaxis	Bacterial chemotaxis
ECs2593	1.10348	1.21912	0.465909	1.23968	9	response regulator for chemotaxis CheA sensor	chemotaxis	Stress response	chemotaxis	Bacterial chemotaxis
ECs2974	1.18756	1.0477	0.516469	1.2672	9	Shiga toxin I subunit A precursor	Shiga toxin	Pathogenicity	Shiga toxin	Pathogenic Escherichia coli infection
ECs1080	1.21497	0.855549	0.671704	1.26352	9	prophage maintenance protein	prophage	Other category	prophage
ECs1520	1.19522	0.927862	0.580468	1.30897	9	prophage maintenance protein	prophage	Other category	prophage
ECs0289	1.21619	1.06655	0.600546	1.13136	9	putative integrase	prophage	Nucleotide metabolism and DNA recombination	prophage
ECs2663	1.14752	1.15476	0.493924	1.22773	9	flagellar capping protein FliD	flagellar	Cell motility	cell motility	Flagellar assembly
ECs1448	1.19428	1.07141	0.508846	1.24519	9	protein of flagellar biosynthesis	flagellar	Cell motility	cell motility	Flagellar assembly
ECs0079	1.10861	0.723676	0.601916	1.57433	9	leu operon leader peptide	pathogenicity	Pathogenicity
ECs3120	1.13006	1.22691	0.518685	1.1495	9	InaA protein	stress response	Stress response
ECs2844	1.195	1.09711	0.445354	1.28593	9	O antigen polymerase	lipopolysaccharide	Other category
ECs2829	1.1117	0.572083	0.655376	1.66275	9	UDP-glucose 6-dehydrogenase	carbohydrate metabolism	Carbohydrate metabolism		Amino sugar and nucleotide sugar metabolism
ECs0504	0.946067	1.23519	0.394384	1.46073	9	nitrogen regulatory protein P-II 2	TF	Transcription and RNA processing	transcriptional regulation
ECs3991	0.913294	1.37319	0.488881	1.26109	9	putative transport system permease protein	transport	Transport
ECs3354	1.09834	1.26413	0.44574	1.22226	9	probable formate transporter 2	transport	Transport
ECs2712	1.18936	0.762375	0.703465	1.3473	9	putative cytochrome		Other category
ECs3922	1.01123	1.0972	0.523762	1.39261	9	hypothetical protein		Nucleotide metabolism and DNA recombination		Purine metabolism
ECs2843	1.06725	1.14178	0.48509	1.33212	9	putative glycosyl transferase		Other category
ECs0285	1.07522	0.720943	0.569623	1.64512	9	hypothetical protein		Unknown
ECs0304	1.11272	0.969488	0.473004	1.46579	9	hypothetical protein		Unknown
ECs0432	1.05324	1.48735	0.340989	1.16099	9	hypothetical protein		Unknown
ECs0989	1.0243	1.242	0.482505	1.2814	9	hypothetical protein		Unknown
ECs1009	1.19626	0.818101	0.758919	1.22787	9	hypothetical protein		Unknown
ECs1067	1.17396	0.982005	0.673136	1.18105	9	hypothetical protein		Unknown
ECs1653	0.969662	1.33268	0.512914	1.21742	9	hypothetical protein		Unknown
ECs1762	1.11354	1.3372	0.51908	1.05868	9	hypothetical protein		Unknown
ECs2085	1.16586	1.09482	0.620495	1.13468	9	hypothetical protein		Unknown
ECs2334	1.1246	0.934903	0.536789	1.42045	9	hypothetical protein		Unknown
ECs2748	1.17681	0.924947	0.375744	1.54514	9	hypothetical protein		Unknown
ECs4839	1.21336	1.04761	0.590178	1.16356	9	hypothetical protein		Unknown
ECs5184	1.16935	1.209	0.589933	1.05193	9	hypothetical protein		Unknown
ECs5711	1.15151	1.07014	0.623935	1.16984	9	#N/A		Unknown
ECs5712	1.18241	1.05015	0.635605	1.14533	9	#N/A		Unknown
ECs5754	1.22099	1.08041	0.43542	1.28588	9	#N/A		Unknown
ECs5760	1.07757	1.11968	0.491773	1.33603	9	#N/A		Unknown

## Sheet: Table S3 Sheet 3
Additional file 3: Table S3 Sheet 3 Propensity and module of E. coli genes during treatment of 10 µg ClO2 after 1, 2 and 3 hour (hr). Co-expression network of each module was showing in Fig. 7. Different modules were separated by different colors for easy view.
gene_id	10 µg_1 hr_propensity	10 µg_2 hr_propensity	10 µg_3 hr_propensity	10 µg_ctrl_propensity	Module	annotation	highlighted_function	function_category	selected_sub-category	KEGG_pathway
ECs4774	0.599728	1.7383	1.01276	0.733716	1	3-hydroxyacyl-CoA dehydrogenase/ 3-hydroxybutyryl-CoA epimerase/ delta(3)-cis-delta(2)-trans-enoyl-CoA isomerase/ enoyl-CoA hydratase	antibiotics biosynthesis	Stress response	antibiotics biosynthesis	Biosynthesis of antibiotics
ECs2429	0.475262	1.79578	1.4659	0.43226	1	6-phosphofructokinase II	antibiotics biosynthesis	Stress response	antibiotics biosynthesis	Biosynthesis of antibiotics
ECs5051	0.588305	2.48586	0.699859	0.275148	1	acetyl-CoA synthetase	antibiotics biosynthesis	Stress response	antibiotics biosynthesis	Biosynthesis of antibiotics
ECs4773	0.766135	1.68895	0.980204	0.611758	1	acetyl-CoA transferase	antibiotics biosynthesis	Stress response	antibiotics biosynthesis	Biosynthesis of antibiotics
ECs2454	0.6324	2.38346	0.662549	0.356609	1	acetylornithine delta-aminotransferase	antibiotics biosynthesis	Stress response	antibiotics biosynthesis	Arginine and proline metabolism
ECs1849	0.424238	1.74098	1.54207	0.481783	1	aconitate hydrase 1	antibiotics biosynthesis	Stress response	antibiotics biosynthesis	Biosynthesis of antibiotics
ECs2082	0.474835	1.61806	1.55731	0.530268	1	alcohol dehydrogenase	antibiotics biosynthesis	Stress response	antibiotics biosynthesis	Biosynthesis of antibiotics
ECs2438	0.429417	1.69953	1.41464	0.627432	1	catalase HPII	antibiotics biosynthesis	Stress response	antibiotics biosynthesis	Biosynthesis of antibiotics
ECs1741	0.467721	1.30617	1.88791	0.562161	1	CoA-linked acetaldehyde dehydrogenase/iron-dependent alcohol dehydrogenase	antibiotics biosynthesis	Stress response	antibiotics biosynthesis	Biosynthesis of antibiotics
ECs3639	0.703079	1.8526	1.11534	0.407152	1	enolase	antibiotics biosynthesis	Stress response	antibiotics biosynthesis	Biosynthesis of antibiotics
ECs2022	0.578844	1.40865	1.71444	0.477668	1	glyceraldehyde 3-phosphate dehydrogenase C	antibiotics biosynthesis	Stress response	antibiotics biosynthesis	Biosynthesis of antibiotics
ECs2900	0.520972	1.94231	1.22096	0.444322	1	hypothetical protein	antibiotics biosynthesis	Stress response	antibiotics biosynthesis	Biosynthesis of antibiotics
ECs2092	0.41628	1.57006	1.20626	0.952877	1	hypothetical protein	antibiotics biosynthesis	Stress response	antibiotics resistance	Vancomycin resistance
ECs3225	0.567414	1.62766	1.02154	0.874883	1	putative acyltransferase	antibiotics biosynthesis	Stress response	antibiotics biosynthesis	Biosynthesis of antibiotics
ECs3224	0.629265	1.65536	0.916231	0.864649	1	putative enzyme	antibiotics biosynthesis	Stress response	antibiotics biosynthesis	Biosynthesis of antibiotics
ECs3029	0.631005	1.54952	1.15403	0.761461	1	putative isomerase	antibiotics biosynthesis	Amino acid and protein metabolism	antibiotics biosynthesis	Tyrosine metabolism
ECs2383	0.668919	1.6045	1.21778	0.606014	1	pyruvate kinase I	antibiotics biosynthesis	Stress response	antibiotics biosynthesis	Biosynthesis of antibiotics
ECs3326	0.41426	1.88015	1.30293	0.562836	1	transaldolase A	antibiotics biosynthesis	Stress response	antibiotics biosynthesis	Biosynthesis of antibiotics
ECs3327	0.283692	2.01805	1.44893	0.45528	1	transketolase 2 isozyme	antibiotics biosynthesis	Stress response	antibiotics biosynthesis	Biosynthesis of antibiotics
ECs0795	0.492786	1.57328	1.43946	0.655613	1	putative isomerase	antibiotics biosynthesis	Stress response	antibiotics biosynthesis	Biosynthesis of antibiotics
ECs2098	0.687624	1.63242	1.50231	0.30885	1	glutamate decarboxylase isozyme	quorum sensing	Pathogenicity	quorum sensing	Quorum sensing
ECs2124	0.462154	3.09306	0.395226	0.0864813	1	hypothetical protein	quorum sensing	Pathogenicity	quorum sensing	Quorum sensing
ECs2125	0.466106	3.10444	0.394238	0.0712813	1	hypothetical protein	quorum sensing	Pathogenicity	quorum sensing	Quorum sensing
ECs2045	0.598725	2.51809	0.613812	0.305281	1	putative ATP-binding component of a transport system	quorum sensing	Pathogenicity	quorum sensing	Quorum sensing
ECs2120	0.553613	2.76007	0.504384	0.213521	1	putative ATP-binding component of a transport system	quorum sensing	Pathogenicity	quorum sensing	Quorum sensing
ECs2091	0.416849	1.7796	1.16573	0.778876	1	putative hemin-binding lipoprotein	quorum sensing	Pathogenicity	quorum sensing	Quorum sensing
ECs2118	0.672922	2.50948	0.556458	0.27477	1	putative kinase	quorum sensing	Pathogenicity	quorum sensing	Quorum sensing
ECs2123	0.444004	3.09345	0.395352	0.107725	1	putative LACI-type transcriptional regulator	quorum sensing	Pathogenicity	quorum sensing	Quorum sensing
ECs2044	0.391837	2.80993	0.550527	0.317629	1	putative transport protein	quorum sensing	Pathogenicity	quorum sensing	Quorum sensing
ECs2046	0.622786	2.34842	0.666442	0.399611	1	putative transport system permease protein	quorum sensing	Pathogenicity	quorum sensing	Quorum sensing
ECs2121	0.705587	2.49457	0.535794	0.268417	1	putative transport system permease protein	quorum sensing	Pathogenicity	quorum sensing	Quorum sensing
ECs2122	0.624598	2.72413	0.460446	0.2024	1	putative transport system permease protein	quorum sensing	Pathogenicity	quorum sensing	Quorum sensing
ECs2047	0.420891	2.79737	0.573646	0.275257	1	putative transport system permease protein	quorum sensing	Pathogenicity	quorum sensing	Quorum sensing
ECs2071	0.299879	2.61927	0.810486	0.391832	1	cryptic nitrate reductase 2 alpha subunit	two-component system	Pathogenicity	two-component system	Two-component system
ECs2070	0.27873	2.6902	0.765722	0.385443	1	cryptic nitrate reductase 2 beta subunit	two-component system	Pathogenicity	two-component system	Two-component system
ECs2069	0.300605	2.59245	0.813836	0.41474	1	cryptic nitrate reductase 2 delta subunit	two-component system	Pathogenicity	two-component system	Two-component system
ECs2068	0.391196	2.35445	0.859678	0.503262	1	cryptic nitrate reductase 2 gamma subunit	two-component system	Pathogenicity	two-component system	Two-component system
ECs1419	0.299551	1.90121	1.11789	0.839886	1	minor curlin subunit precursor CsgB	biofilm formation	Pathogenicity	biofilm formation	Biofilm formation - Escherichia coli
ECs5359	0.802679	1.68539	0.894939	0.645544	1	negative response regulator of genes in aerobic pathways ArcA	biofilm formation	Pathogenicity	biofilm formation	Biofilm formation - Escherichia coli
ECs0253	0.513148	2.10061	0.980834	0.504612	1	damage-inducible protein DinJ	SOS response	Stress response	SOS response
ECs2811	0.419738	2.12482	1.02205	0.556625	1	SbmC protein	SOS response	Stress response	SOS response
ECs2355	0.337656	2.36512	1.04038	0.399917	1	superoxide dismutase precursor (Cu-Zn)	SOS response	Stress response	SOS response
ECs5017	0.7754	1.69936	1.23966	0.365088	1	periplasmic maltose-binding protein	chemotaxis	Stress response	chemotaxis	Bacterial chemotaxis
ECs5130	0.433076	1.73233	1.33045	0.663501	1	outer membrane lipoprotein lipocalin	outer membrane protein	Pathogenicity	outer membrane protein
ECs4377	0.546449	2.12592	0.95731	0.459964	1	outer membrane protein Slp	outer membrane protein	Pathogenicity	outer membrane protein
ECs5019	0.704885	1.55121	1.33664	0.512781	1	maltose high-affinity receptor LamB	pathogenicity	Pathogenicity
ECs4644	0.743845	1.72907	0.97533	0.602769	1	tryptophanase leader peptide	pathogenicity	Pathogenicity
ECs0507	0.639321	1.66598	1.19004	0.604368	1	glycoprotein/polysaccharide metabolism	polysaccharide	Carbohydrate metabolism
ECs1773	0.83653	1.70437	1.25268	0.275587	1	putative prophage maintenance protein	prophage	Other category	prophage
ECs4189	0.556868	2.36374	0.636728	0.489111	1	bacterioferrin	stress response	Stress response		Porphyrin and chlorophyll metabolism
ECs5334	0.385315	1.6765	1.10348	0.973268	1	hyperosmotically inducible periplasmic protein	stress response	Other category
ECs2086	0.672255	1.91573	0.986261	0.493296	1	osmotically inducible protein	stress response	Stress response
ECs0434	0.429164	2.71245	0.615891	0.313174	1	phosphate starvation-induced protein psiF	stress response	Stress response
ECs5163	0.508873	1.57729	1.42191	0.647596	1	putative acyl coenzyme A dehydrogenase	stress response	Stress response
ECs1008	0.531203	1.65198	1.33308	0.62363	1	putative amidase	stress response	Stress response
ECs3135	0.427614	1.78929	1.33463	0.609731	1	putative racemase	carbohydrate metabolism	Carbohydrate metabolism		Fructose and mannose metabolism
ECs3662	0.739212	1.45847	1.32678	0.572507	1	L-fucose isomerase	carbohydrate metabolism	Carbohydrate metabolism		Fructose and mannose metabolism
ECs5101	0.713762	2.3466	0.863321	0.121557	1	alpha-galactosidase	carbohydrate metabolism	Carbohydrate metabolism		Galactose metabolism
ECs1158	0.637882	2.01584	1.07181	0.3606	1	periplasmic glucose-1-phosphatase	carbohydrate metabolism	Carbohydrate metabolism		Glycolysis / Gluconeogenesis
ECs0473	0.649811	1.89343	1.02292	0.510549	1	putative NAD(P)H-dependent xylose reductase	carbohydrate metabolism	Carbohydrate metabolism
ECs2666	0.419624	1.5689	1.33132	0.84148	1	cytoplasmic alpha-amylase	carbohydrate metabolism	Carbohydrate metabolism		Starch and sucrose metabolism
ECs0919	0.463002	1.66598	0.989233	0.989859	1	D-alanyl-D-alanine carboxypeptidase penicillin-binding protein 6	carbohydrate metabolism	Carbohydrate metabolism		Peptidoglycan biosynthesis
ECs2693	0.497218	1.90295	1.25784	0.479924	1	hypothetical protein	carbohydrate metabolism	Carbohydrate metabolism		Fructose and mannose metabolism
ECs2605	0.465685	1.83245	1.13672	0.692978	1	trehalose-6-phosphate phophatase	carbohydrate metabolism	Carbohydrate metabolism		Starch and sucrose metabolism
ECs2604	0.587727	1.82016	1.17711	0.523975	1	trehalose-6-phosphate synthase	carbohydrate metabolism	Carbohydrate metabolism		Starch and sucrose metabolism
ECs5020	0.863585	1.67092	1.05481	0.448221	1	periplasmic protein of mal regulon	regulon	Transcription and RNA processing	transcriptional regulation
ECs4477	0.515657	1.83982	1.38047	0.414217	1	repressor for mtl	repressor	Transcription and RNA processing	transcriptional regulation
ECs5202	0.417055	1.56664	1.37916	0.805271	1	suppressor of inhibitory function of ChpB	suppressor	Transcription and RNA processing	transcriptional regulation
ECs0150	0.644804	1.90935	0.813853	0.682172	1	probable regulator for maltose metabolism	TF	Carbohydrate metabolism
ECs3525	0.405985	2.12863	0.996518	0.591471	1	putative transcriptional regulator	TF	Transcription and RNA processing	transcriptional regulation
ECs3049	0.575514	1.57203	0.87558	1.04724	1	putative transcriptional regulator LYSR-type	TF	Transcription and RNA processing	transcriptional regulation
ECs0489	0.380785	2.5476	0.745411	0.422728	1	putative regulator of murein genes	TF	Transcription and RNA processing	transcriptional regulation
ECs4646	0.797606	1.61149	1.16656	0.489379	1	low affinity tryptophan permease	transport	Transport
ECs3524	0.472342	2.45116	0.861782	0.308018	1	transport permease protein of gamma-aminobutyrate	transport	Transport
ECs4299	0.387471	1.91489	0.918706	0.893868	1	periplasmic binding protein of sn-glycerol 3-phosphate transport system	transport	Transport		ABC transporters
ECs2389	0.404	2.25255	1.16622	0.323239	1	putative ATP-binding component of a transport system	transport	Transport
ECs0415	0.461518	1.94167	0.981143	0.724335	1	putative periplasmic-iron-binding protein	transport	Transport		ABC transporters
ECs3018	0.426015	1.86959	1.06853	0.76273	1	putative transport system permease protein	transport	Transport		ABC transporters
ECs1429	0.24786	1.59122	1.27848	1.07087	1	acidic protein MsyB	transport	Transport
ECs1722	0.595501	2.07043	0.946271	0.466008	1	cation transport regulator	transport	Transport
ECs3271	0.726404	1.67562	1.12613	0.545947	1	high affinity manganese transport protein	transport	Transport
ECs3227	0.463283	2.40806	0.696155	0.505518	1	long-chain fatty acid transport protein FadL	transport	Transport
ECs5093	0.777025	1.52209	1.27484	0.509004	1	low-affinity transport system proline permease II	transport	Transport
ECs4156	0.698249	1.6741	0.867238	0.805906	1	mechanosensitive channel	transport	Transport
ECs0934	0.421142	1.97946	1.03201	0.690931	1	periplasmic putrescine-binding permease protein	transport	Transport		ABC transporters
ECs4729	0.369152	1.95672	0.969608	0.830003	1	putative amino acid/amine transport protein	transport	Transport
ECs0539	0.66022	1.65212	1.22923	0.559113	1	putative amino acid/amine transport protein	transport	Transport
ECs2404	0.51269	1.51297	1.64309	0.515029	1	putative transport protein	transport	Transport
ECs2417	0.562959	1.56029	1.21199	0.781942	1	vitamin B12 transport	transport	Transport		Glutathione metabolism
ECs5215	0.521001	1.69854	1.27319	0.641505	1	anaerobic ribonucleoside-triphosphate reductase		Nucleotide metabolism and DNA recombination		Purine metabolism
ECs0314	0.281358	1.72725	1.32	0.859341	1	hypothetical protein		Nucleotide metabolism and DNA recombination		Purine metabolism
ECs0315	0.223892	1.69402	1.5447	0.76619	1	hypothetical protein		Nucleotide metabolism and DNA recombination		Purine metabolism
ECs3896	0.328783	2.73501	0.846862	0.210471	1	2,5-diketo-D-gluconate reductase		Other category
ECs1879	0.480052	1.63603	1.26478	0.760054	1	4-aminobutyrate aminotransferase		Other category		Propanoate metabolism
ECs0188	0.383691	1.97483	1.21863	0.578417	1	lysine decarboxylase 2		Amino acid and protein metabolism		Lysine degradation
ECs3387	0.591413	1.84057	1.21099	0.469846	1	putative thiosulfate sulfurtransferase		Amino acid and protein metabolism		Cysteine and methionine metabolism
ECs3523	0.43755	2.71043	0.684966	0.245181	1	4-aminobutyrate aminotransferase activity		Other category		Propanoate metabolism
ECs2021	0.525144	1.83019	0.970073	0.768667	1	aldehyde dehydrogenase		Other category		Pyruvate metabolism
ECs1877	0.458158	1.582	1.324	0.788643	1	aldehyde dehydrogenase		Amino acid and protein metabolism		Arginine and proline metabolism
ECs4464	0.511021	2.53964	0.736066	0.282771	1	aldehyde dehydrogenase B		Amino acid and protein metabolism		Pyruvate metabolism
ECs1155	0.555959	1.9684	1.16872	0.421801	1	curved DNA-binding protein		Nucleotide metabolism and DNA recombination
ECs2370	0.616303	1.92781	1.26429	0.306964	1	cyclopropane fatty acyl phospholipid synthase		Other category
ECs5213	0.567635	1.87624	0.792648	0.825954	1	cytochrome b(562)		Other category
ECs1705	0.486545	1.94291	1.08697	0.601259	1	dihydroxyacetone kinase		Other category		Glycerolipid metabolism
ECs1704	0.60135	1.88452	1.05153	0.552618	1	dihydroxyacetone kinase		Other category		Glycerolipid metabolism
ECs3312	0.365117	1.63242	1.3435	0.832986	1	ethanolamine ammonia-lyase heavy chain		Other category		Glycerophospholipid metabolism
ECs4293	0.433402	1.69458	1.26817	0.754729	1	gamma-glutamyltranspeptidase		Amino acid and protein metabolism		Glutathione metabolism
ECs1442	0.662962	2.05079	1.03924	0.324047	1	glutaredoxin 2		Other category
ECs4212	0.289744	2.16503	1.1181	0.588938	1	induced in stationary phase, recognized by rpoS, affects cell division		Cell division
ECs4188	0.406294	2.16474	0.922471	0.619445	1	leader peptidase HopD		Amino acid and protein metabolism
ECs2072	0.438782	2.04341	1.0488	0.591603	1	nitrite extrusion protein 2		Other category		Nitrogen metabolism
ECs3102	0.401188	1.60709	1.54278	0.642009	1	O6-methylguanine-DNA methyltransferase		Nucleotide metabolism and DNA recombination
ECs0700	0.602459	1.65758	1.1579	0.684778	1	oxygenase		Other category		Ubiquinone and other terpenoid-quinone biosynthesis
ECs3288	0.633382	1.565	1.18533	0.716051	1	PEP-protein phosphotransferase system enzyme I		Other category		Phosphotransferase system (PTS
ECs2420	0.804376	1.68847	0.94368	0.598141	1	phenylalanine tRNA synthetase beta-subunit		Nucleotide metabolism and DNA recombination		Aminoacyl-tRNA biosynthesis
ECs2373	0.37787	1.69349	1.26112	0.828449	1	possible enzyme		Other category
ECs3955	0.441084	2.07937	1.10226	0.506662	1	probable ornithine aminotransferase		Amino acid and protein metabolism		Arginine and proline metabolism
ECs1878	0.565062	1.55401	1.32388	0.688551	1	probable oxidoreductase		Amino acid and protein metabolism		Arginine and proline metabolism
ECs2048	0.611955	2.51044	0.638163	0.275916	1	putative aldehyde dehydrogenase		Amino acid and protein metabolism		Arginine and proline metabolism
ECs2452	0.711382	2.47127	0.692376	0.148744	1	putative aldehyde dehydrogenase		Amino acid and protein metabolism		Arginine and proline metabolism
ECs0681	0.613181	1.70139	1.01168	0.75526	1	putative alpha helical protein		Nucleotide metabolism and DNA recombination
ECs5211	0.455164	1.5652	0.949659	1.13388	1	putative alpha helix protein		Nucleotide metabolism and DNA recombination
ECs0386	0.384524	3.15698	0.422211	0.0924398	1	putative citrate synthase		Other category		Propanoate metabolism
ECs3745	0.387471	1.7257	0.962382	1.04421	1	putative deacetylase		Other category
ECs3754	0.545767	1.75186	0.947059	0.841875	1	putative dehydrogenase		Other category		Selenocompound metabolism
ECs2126	0.507837	2.47977	0.762446	0.323258	1	putative enzyme		Other category
ECs0878	0.504665	1.65918	1.39887	0.591147	1	putative enzyme		Other category
ECs0948	0.338416	1.6612	1.53371	0.671223	1	putative enzyme		Other category
ECs1997	0.732414	1.83377	0.78112	0.680857	1	putative filament protein		Cell motility	cell motility
ECs2405	0.592851	1.51645	1.50829	0.532565	1	putative flavoprotein		Other category
ECs3030	0.586678	1.62949	1.12971	0.756092	1	putative gentisate 1,2-dioxygenase		Amino acid and protein metabolism		Tyrosine metabolism
ECs0538	0.474951	1.90662	1.31233	0.45565	1	putative glutaminase		Amino acid and protein metabolism		Arginine biosynthesis
ECs3028	0.637218	1.57251	1.11359	0.766247	1	putative glutathione-S-transferase		Amino acid and protein metabolism		Tyrosine metabolism
ECs0873	0.413977	1.8757	1.32702	0.546696	1	putative membrane protein		Other category
ECs3963	0.444193	1.99688	0.794301	0.852335	1	putative NADPH dehydrogenase		Other category
ECs5241	0.503404	2.21526	0.949865	0.429077	1	putative oxidoreductase		Other category
ECs3024	0.310056	2.46478	0.963939	0.400169	1	putative oxidoreductase		Other category
ECs2312	0.509449	1.57074	0.986625	1.03126	1	putative oxidoreductase		Other category		Folate biosynthesis
ECs0379	0.469221	1.64396	1.30594	0.729415	1	putative oxidoreductase		Other category
ECs2053	0.490325	1.75551	1.36473	0.54211	1	putative oxidoreductase		Other category
ECs3751	0.533803	1.63242	1.09491	0.846722	1	putative oxidoreductase Fe-S subunit		Other category		Selenocompound metabolism
ECs0385	0.443631	2.87892	0.577676	0.16337	1	putative phosphonomutase 2		Other category		Propanoate metabolism
ECs1423	0.439807	1.82783	1.22652	0.650616	1	putative polyprotein		Other category
ECs0388	0.355452	3.23572	0.345717	0.115305	1	putative propionyl-CoA synthetase		Other category		Propanoate metabolism
ECs3027	0.693939	1.54704	1.20314	0.645929	1	putative salicylate hydroxylase		Other category		Benzoate degradation
ECs1683	0.458436	2.62877	0.746404	0.248093	1	putative sporulation protein		Other category
ECs2103	0.58865	2.0444	1.12296	0.346748	1	putative sulfatase		Other category
ECs2509	0.5983	1.61321	1.43099	0.496852	1	putative tartrate dehydrogenase		Other category		Glyoxylate and dicarboxylate metabolism
ECs5033	0.544235	1.805	1.17296	0.594745	1	quinone oxidoreductase		Other category
ECs2387	0.369487	2.2752	1.15547	0.351373	1	selenocysteine lyase		Other category		Selenocompound metabolism
ECs3522	0.360243	2.70635	0.8179	0.22645	1	succinate-semialdehyde dehydrogenase		Amino acid and protein metabolism		Alanine, aspartate and glutamate metabolism
ECs4645	0.763684	1.83559	1.14775	0.32335	1	tryptophanase		Amino acid and protein metabolism		Tryptophan metabolism
ECs0619	0.418999	2.28209	0.996041	0.423596	1	hypothetical protein		Amino acid and protein metabolism		Glutathione metabolism
ECs2451	0.733666	2.40811	0.717522	0.163066	1	hypothetical protein		Amino acid and protein metabolism		Arginine and proline metabolism
ECs2453	0.681999	2.41809	0.739892	0.195611	1	hypothetical protein		Amino acid and protein metabolism		Arginine and proline metabolism
ECs2705	0.664124	1.66454	1.46038	0.341427	1	hypothetical protein		Other category		Pyruvate metabolism
ECs0387	0.280887	3.32051	0.385709	0.0855336	1	hypothetical protein		Other category		Propanoate metabolism
ECs3750	0.605518	1.58618	1.01589	0.875422	1	hypothetical protein		Other category		Folate biosynthesis
ECs3753	0.516628	1.91744	0.920798	0.734813	1	hypothetical protein		Other category		Selenocompound metabolism
ECs0884	0.301484	1.89959	1.32366	0.66058	1	hypothetical protein		Unknown
ECs0982	0.625976	2.15147	0.882563	0.404161	1	hypothetical protein		Unknown
ECs1049	0.431452	2.08722	1.16815	0.453193	1	hypothetical protein		Unknown
ECs1692	0.417632	2.28436	1.03712	0.387313	1	hypothetical protein		Unknown
ECs2281	0.583196	1.9119	1.10341	0.502084	1	hypothetical protein		Unknown
ECs2320	0.539508	2.17045	0.998695	0.388043	1	hypothetical protein		Unknown
ECs2386	0.431942	2.16732	1.13976	0.397549	1	hypothetical protein		Unknown
ECs2388	0.405511	2.22441	1.21108	0.310493	1	hypothetical protein		Unknown
ECs2390	0.435805	2.16874	1.24689	0.298515	1	hypothetical protein		Unknown
ECs2391	0.398207	2.22112	1.23051	0.305652	1	hypothetical protein		Unknown
ECs2430	0.315941	2.32049	1.10396	0.415158	1	hypothetical protein		Unknown
ECs2695	0.249209	2.01882	1.28317	0.63969	1	hypothetical protein		Unknown
ECs3409	0.382297	1.9497	1.14527	0.668768	1	hypothetical protein		Unknown
ECs4033	0.512121	1.93518	1.08235	0.582334	1	hypothetical protein		Unknown
ECs4034	0.420098	1.90401	1.13214	0.680345	1	hypothetical protein		Unknown
ECs4213	0.600685	2.01568	0.907173	0.548209	1	hypothetical protein		Unknown
ECs4392	0.656403	2.04386	1.16214	0.23212	1	hypothetical protein		Unknown
ECs4404	0.381717	1.8741	1.14882	0.741601	1	hypothetical protein		Unknown
ECs4633	0.359928	1.92085	1.21384	0.664742	1	hypothetical protein		Unknown
ECs5175	0.512867	1.91578	1.3103	0.402879	1	hypothetical protein		Unknown
ECs0383	0.477612	2.691	0.442161	0.427291	1	hypothetical protein		Unknown
ECs0497	0.43852	2.55374	0.686808	0.398336	1	hypothetical protein		Unknown
ECs0509	0.629943	2.31061	0.629952	0.460338	1	hypothetical protein		Unknown
ECs0881	0.265034	2.73466	0.853707	0.281236	1	hypothetical protein		Unknown
ECs1438	0.641143	2.28314	0.602905	0.497732	1	hypothetical protein		Unknown
ECs2385	0.338762	2.42605	1.10644	0.280623	1	hypothetical protein		Unknown
ECs3022	0.578655	2.31649	0.845613	0.328719	1	hypothetical protein		Unknown
ECs3401	0.394369	2.54066	0.701043	0.45187	1	hypothetical protein		Unknown
ECs3521	0.501438	2.73368	0.593709	0.224739	1	hypothetical protein		Unknown
ECs5108	0.416866	2.43658	0.849664	0.399484	1	hypothetical protein		Unknown
ECs5109	0.433316	2.61811	0.705879	0.323965	1	hypothetical protein		Unknown
ECs0461	0.815192	1.65052	0.712787	0.823364	1	hypothetical protein		Unknown
ECs1050	0.581656	1.77715	0.926141	0.791885	1	hypothetical protein		Unknown
ECs1154	0.59661	1.79843	1.27334	0.451426	1	hypothetical protein		Unknown
ECs1159	0.6204	1.86664	1.04378	0.554317	1	hypothetical protein		Unknown
ECs1914	0.776764	1.72802	0.918408	0.613791	1	hypothetical protein		Unknown
ECs2028	0.604515	1.75205	0.904335	0.808412	1	hypothetical protein		Unknown
ECs2145	0.639501	1.70756	1.02074	0.709729	1	hypothetical protein		Unknown
ECs2279	0.46809	1.80303	1.07661	0.771542	1	hypothetical protein		Unknown
ECs2280	0.682334	1.75049	1.10356	0.543825	1	hypothetical protein		Unknown
ECs2431	0.786312	1.67419	1.13631	0.466778	1	hypothetical protein		Unknown
ECs2511	0.642512	1.82019	0.934	0.669344	1	hypothetical protein		Unknown
ECs2519	0.599357	1.73386	0.734638	0.979993	1	hypothetical protein		Unknown
ECs2785	0.594367	1.85421	1.07644	0.569522	1	hypothetical protein		Unknown
ECs3179	0.562437	1.76927	1.06893	0.698807	1	hypothetical protein		Unknown
ECs3257	0.766567	1.64275	1.01939	0.623203	1	hypothetical protein		Unknown
ECs3309	0.65398	1.61585	1.13988	0.680237	1	hypothetical protein		Unknown
ECs3526	0.508128	1.82044	1.04663	0.732284	1	hypothetical protein		Unknown
ECs3752	0.513692	1.77258	1.01598	0.799856	1	hypothetical protein		Unknown
ECs4390	0.921576	1.754	1.14515	0.217681	1	hypothetical protein		Unknown
ECs5048	0.679851	1.89344	0.925839	0.558827	1	hypothetical protein		Unknown
ECs5299	0.700982	1.53315	1.30864	0.559733	1	hypothetical protein		Unknown
ECs1428	0.380797	1.57448	1.41812	0.807075	1	hypothetical protein		Unknown
ECs2357	0.450847	1.68596	1.19859	0.802801	1	hypothetical protein		Unknown
ECs3465	0.533735	1.69901	1.29679	0.605298	1	hypothetical protein		Unknown
ECs4402	0.486005	1.70356	1.4539	0.521572	1	hypothetical protein		Unknown
ECs5089	0.514468	1.78124	1.19461	0.635252	1	hypothetical protein		Unknown
ECs5184	0.302112	1.51928	1.28503	1.07178	1	hypothetical protein		Unknown
ECs5240	0.404513	1.79913	1.12581	0.808877	1	hypothetical protein		Unknown
ECs2492	0.321993	3.02696	0.590633	0.150511	1	hypothetical protein		Unknown
ECs2493	0.381982	3.04447	0.516355	0.125713	1	hypothetical protein		Unknown
ECs2888	0.575381	2.85395	0.409918	0.176036	1	hypothetical protein		Unknown
ECs3520	0.532346	2.87696	0.446373	0.17304	1	hypothetical protein		Unknown
ECs5757	0.613431	2.05501	1.19205	0.246532	1	#N/A		Unknown
ECs5761	0.182769	2.61317	1.15949	0.235224	1	#N/A		Unknown
ECs5758	0.668935	1.62875	1.18927	0.606613	1	#N/A		Unknown
ECs5780	0.431464	1.75975	1.04007	0.890204	1	#N/A		Unknown
ECs0633	0.43799	0.742009	2.01456	1.0492	2	2,3-dihydroxybenzoate-AMP ligase	antibiotics biosynthesis	Stress response	antibiotics biosynthesis	Biosynthesis of antibiotics
ECs4703	0.242169	0.678408	2.1204	1.25516	2	acetolactate synthase II small subunit	antibiotics biosynthesis	Stress response	antibiotics biosynthesis	Biosynthesis of antibiotics
ECs4888	0.298693	0.189758	1.7352	2.00804	2	acetylglutamate kinase	antibiotics biosynthesis	Stress response	antibiotics biosynthesis	Biosynthesis of antibiotics
ECs0527	0.567331	0.366645	0.998555	2.1497	2	adenylate kinase	antibiotics biosynthesis	Stress response	antibiotics biosynthesis	Biosynthesis of antibiotics
ECs1603	0.509176	0.548126	1.98783	1.18006	2	adenylosuccinate lyase	antibiotics biosynthesis	Stress response	antibiotics biosynthesis	Biosynthesis of antibiotics
ECs4868	0.295373	0.556507	1.79864	1.59202	2	cystathionine gamma-synthase	antibiotics biosynthesis	Stress response	antibiotics biosynthesis	Biosynthesis of antibiotics
ECs4286	0.672228	0.609812	2.27191	0.676801	2	gluconokinase 2	antibiotics biosynthesis	Stress response	antibiotics biosynthesis	Biosynthesis of antibiotics
ECs4091	0.329131	0.184628	1.49034	2.18924	2	glutamate synthase large subunit	antibiotics biosynthesis	Stress response	antibiotics biosynthesis	Biosynthesis of antibiotics
ECs2824	0.622432	0.488136	2.00078	1.09286	2	glutamine amidotransferase subunit of heterodimer with HisF	antibiotics biosynthesis	Amino acid and protein metabolism		Biosynthesis of amino acids
ECs3775	0.656116	0.295774	0.802552	2.28401	2	glycine cleavage system H protein	antibiotics biosynthesis	Stress response	antibiotics biosynthesis	Biosynthesis of antibiotics
ECs2822	0.552456	0.478959	2.27333	0.949229	2	histidinol-phosphate aminotransferase	antibiotics biosynthesis	Stress response	antibiotics biosynthesis	Biosynthesis of antibiotics
ECs0632	0.393988	0.723856	2.01723	1.11765	2	isochorismate hydroxymutase 2	antibiotics biosynthesis	Stress response	antibiotics biosynthesis	Biosynthesis of antibiotics
ECs3657	0.528644	0.407256	1.06014	2.10216	2	L-serine dehydratase	antibiotics biosynthesis	Stress response	antibiotics biosynthesis	Biosynthesis of antibiotics
ECs3380	0.565633	0.193943	0.629127	2.64425	2	nucleoside diphosphate kinase	antibiotics biosynthesis	Stress response	antibiotics biosynthesis	Biosynthesis of antibiotics
ECs0585	0.306708	0.578731	1.44122	1.86658	2	phosphoribosylaminoimidazole carboxylase	antibiotics biosynthesis	Stress response	antibiotics biosynthesis	Biosynthesis of antibiotics
ECs3701	0.6356	0.504012	0.818849	2.08723	2	putative acyltransferase	antibiotics biosynthesis	Stress response	antibiotics biosynthesis	Two-component system
ECs4327	0.557038	0.281452	1.10076	2.15808	2	putative acyltransferase	antibiotics biosynthesis	Stress response	antibiotics biosynthesis
ECs2846	0.703338	0.455628	0.803495	2.06757	2	putative Galf transferase	antibiotics biosynthesis	Stress response	antibiotics biosynthesis	Biosynthesis of antibiotics
ECs3099	0.603806	0.443355	2.16207	1.01972	2	putative malate:quinone oxidoreductase	antibiotics biosynthesis	Stress response	antibiotics biosynthesis	Biosynthesis of antibiotics
ECs1832	0.414865	0.447599	2.03026	1.35622	2	tryptophan synthase alpha protein	antibiotics biosynthesis	Stress response	antibiotics biosynthesis	Biosynthesis of antibiotics
ECs3605	0.649369	0.676423	1.98367	0.888092	2	ATP-sulfurylase (ATP:sulfate adenylyltransferase), subunit 1, probably a GTPase	antibiotics biosynthesis	Stress response	antibiotics biosynthesis	Biosynthesis of antibiotics
ECs4092	0.470306	0.229313	1.44578	2.01436	2	glutamate synthase small subunit	antibiotics biosynthesis	Stress response	antibiotics biosynthesis	Biosynthesis of antibiotics
ECs3399	0.5034	0.219019	1.29719	2.11394	2	extragenic suppressor protein SuhB	antibiotics biosynthesis	Stress response	antibiotics biosynthesis	Streptomycin biosynthesis
ECs0639	0.410553	0.446365	2.17465	1.23728	2	putative aminotransferase	antibiotics biosynthesis	Stress response	antibiotics biosynthesis
ECs3776	0.253965	0.138545	0.612833	3.08681	2	aminomethyltransferase	antibiotics biosynthesis	Stress response	antibiotics biosynthesis	Biosynthesis of antibiotics
ECs0119	0.653576	0.580963	2.26534	0.733551	2	pyruvate dehydrogenase dihydrolipoyltransacetylase component	antibiotics biosynthesis	Stress response	antibiotics biosynthesis	Biosynthesis of antibiotics
ECs0051	0.492531	0.508947	0.834791	2.23984	2	dihydrofolate reductase type I; trimethoprim resistance	antibiotics resistance	Stress response	antibiotics resistance	Folate biosynthesis
ECs4238	0.484338	0.265674	0.862895	2.46733	2	peptidoglycan synthetase	antibiotics resistance	Stress response	antibiotics resistance	beta-Lactam resistance
ECs0673	0.525692	0.239734	0.821249	2.47976	2	peptidoglycan synthetase penicillin-binding protein 2	antibiotics resistance	Stress response	antibiotics resistance	beta-Lactam resistance
ECs1624	0.138382	0.666294	1.62306	1.82322	2	lipoprotein Rz1 precursor	prophage	Stress response	prophage
ECs1617	0.3281	0.421269	2.98804	0.654969	2	NinE protein	prophage	Other category	prophage
ECs0812	0.296967	1.01281	1.91228	1.03743	2	NinG protein	prophage	Other category	prophage
ECs1977	0.492456	0.27359	1.54199	1.86026	2	putative head-tail adaptor	prophage	Other category	prophage
ECs1962	0.267661	0.27923	1.66201	2.01972	2	putative holin protein	prophage	Other category	prophage
ECs1092	0.317847	0.765196	2.19293	1.0152	2	putative lipoprotein Rz1 protein precursor	prophage	Transport	prophage
ECs2762	0.395196	1.00148	1.96601	0.884409	2	putative phage replication protein	prophage	Nucleotide metabolism and DNA recombination	prophage
ECs1986	0.411914	0.305125	1.26794	2.16323	2	putative tail assembly protein	prophage	Other category	prophage
ECs1558	0.32187	0.929859	1.80616	1.18226	2	putative tail assembly protein	prophage	Other category	prophage
ECs1987	0.330768	0.331793	1.44531	2.07993	2	putative tail assembly protein	prophage	Other category	prophage
ECs1992	0.304752	0.458545	1.41924	2.00759	2	putative tail fiber protein	prophage	Other category	prophage
ECs1983	0.358332	0.265434	1.36924	2.17897	2	putative tail length tape measure protein	prophage	Other category	prophage
ECs2644	0.414649	0.616561	1.9689	1.24161	2	putative tail tube protein	prophage	Other category	prophage
ECs1651	0.510201	0.633949	2.22557	0.88707	2	tail fiber assembly protein	prophage	Other category	prophage
ECs4792	0.748179	0.450568	2.04557	0.940748	2	glutamine synthetase	two-component system	Pathogenicity	two-component system	Two-component system
ECs4791	0.638187	0.568761	2.07875	0.926085	2	histidine protein kinase sensor GlnL	two-component system	Pathogenicity	two-component system	Two-component system
ECs3332	0.428667	0.469086	1.16508	2.0693	2	aminoglycoside efflux pump	two-component system	Pathogenicity	two-component system	Two-component system
ECs0655	0.339037	0.81621	1.8713	1.21824	2	citrate lyase beta chain	two-component system	Pathogenicity	two-component system	Two-component system
ECs2662	0.393166	0.180499	1.03456	2.51227	2	flagellin	two-component system	Pathogenicity	two-component system	Two-component system
ECs2884	0.600825	0.413271	1.06593	2.0047	2	hypothetical protein	two-component system	Pathogenicity	two-component system	Two-component system
ECs1153	0.440872	0.911883	2.21917	0.699113	2	part of trimethylamine-N-oxide oxidoreductase	two-component system	Pathogenicity	two-component system	Two-component system
ECs4664	0.429619	0.299069	1.32134	2.1017	2	phosphate-binding periplasmic protein PstS	two-component system	Pathogenicity	two-component system	Two-component system
ECs2937	0.515926	0.549209	0.929838	2.08926	2	putative 2-component sensor protein	two-component system	Pathogenicity	two-component system
ECs2882	0.347423	0.547985	1.42166	1.86539	2	putative membrane protein	two-component system	Pathogenicity	two-component system	Two-component system
ECs4790	0.620077	0.623854	2.04753	0.920056	2	response regulator for gln GlnG	two-component system	Pathogenicity	two-component system	Two-component system
ECs2314	0.231494	0.0784557	0.260506	3.47935	2	response transcriptional regulatory protein RstB sensor	two-component system	Pathogenicity	two-component system	Two-component system
ECs2315	0.228581	0.0775584	0.400085	3.36257	2	sensor histidine protein kinase RstA regulator	two-component system	Pathogenicity	two-component system	Two-component system
ECs1601	0.460291	0.544562	1.09607	2.01623	2	sensor protein PhoQ	two-component system	Pathogenicity	two-component system	Two-component system
ECs1152	0.385269	0.865677	2.05559	0.953675	2	trimethylamine N-oxide reductase subunit	two-component system	Pathogenicity	two-component system	Two-component system
ECs1449	0.469826	0.529874	1.12722	1.99238	2	flagellin synthesis regulatory protein sigma-28 inhibitor flgM	biofilm formation	Pathogenicity	sigma-related	Biofilm formation - Escherichia coli
ECs1268	0.528008	0.735927	2.05153	0.915346	2	hypothetical protein	biofilm formation	Pathogenicity	biofilm formation	Biofilm formation - Escherichia coli
ECs1269	0.580671	0.721511	2.01604	0.897416	2	hypothetical protein	biofilm formation	Pathogenicity	biofilm formation	Biofilm formation - Escherichia coli
ECs2107	0.343951	0.709747	1.42381	1.70672	2	putative adhesin	biofilm formation	Pathogenicity	biofilm formation
ECs1139	0.375955	0.326158	1.30393	2.15413	2	putative function in exopolysaccharide production	biofilm formation	Pathogenicity	biofilm formation	Biofilm formation - Escherichia coli
ECs2601	0.646247	0.336389	1.01759	2.06876	2	regulator of flagellar biosynthesis FlhC	biofilm formation	Pathogenicity	biofilm formation	Biofilm formation - Escherichia coli
ECs2602	0.481441	0.231294	0.793947	2.56486	2	regulator of flagellar biosynthesis FlhD	biofilm formation	Pathogenicity	biofilm formation	Biofilm formation - Escherichia coli
ECs2661	0.459113	0.45345	1.0721	2.1291	2	transcription initiation factor alternative sigma factor 28	biofilm formation	Pathogenicity	sigma-related	Biofilm formation - Escherichia coli
ECs2112	0.132307	0.358336	0.616159	3.01094	2	putative fimbrial chaperone protein precursor	fimbrial	Cell motility	cell motility
ECs2108	0.291019	0.73564	1.18462	1.95198	2	putative fimbrial-like protein	fimbrial	Cell motility	cell motility
ECs2109	0.200219	0.514148	1.06826	2.38213	2	putative fimbrial-like protein	fimbrial	Cell motility	cell motility
ECs3222	0.410553	0.542014	2.64979	0.729676	2	putative fimbrial-like protein	fimbrial	Cell motility	cell motility
ECs2113	0.0849568	0.0689688	0.0913294	3.81115	2	putative type 1 fimbrial protein precursor	fimbrial	Cell motility	cell motility
ECs0023	0.563496	0.520023	2.08642	1.05738	2	putative fimbrial chaperone	fimbrial	Cell motility	cell motility
ECs4430	0.405223	0.682885	2.25525	0.938354	2	putative fimbrial chaperone protein precursor	fimbrial	Cell motility	cell motility
ECs1453	0.390258	0.293601	1.64917	1.86972	2	flagellar biosynthesis FlgD protein	flagellar	Cell motility	cell motility	Flagellar assembly
ECs2687	0.474652	0.571347	2.05843	1.13703	2	flagellar biosynthetic protein FliP	flagellar	Cell motility	cell motility	Flagellar assembly
ECs2663	0.321501	0.445632	1.33088	2.07708	2	flagellar capping protein FliD	flagellar	Cell motility	cell motility	Flagellar assembly
ECs1460	0.457128	0.489114	1.15642	2.0228	2	flagellar hook-filament junction protein 1 FlgK	flagellar	Cell motility	cell motility	Flagellar assembly
ECs2664	0.389494	0.362286	1.44134	1.98269	2	flagellar protein FliS	flagellar	Cell motility	cell motility	Flagellar assembly
ECs1451	0.32461	0.434154	1.54283	1.9008	2	flagellar rod protein FlgB	flagellar	Cell motility	cell motility	Flagellar assembly
ECs1452	0.395543	0.476122	1.28652	1.99656	2	flagellar rod protein FlgC	flagellar	Cell motility	cell motility	Flagellar assembly
ECs1455	0.331667	0.443592	1.47466	1.94213	2	flagellar rod protein flgF	flagellar	Cell motility	cell motility	Flagellar assembly
ECs2599	0.363254	0.437255	1.18348	2.16335	2	chemotaxis protein MotB	chemotaxis	Stress response	chemotaxis	Bacterial chemotaxis
ECs2685	0.230413	0.87168	1.86221	1.30104	2	flagellar motor switch protein FliN	chemotaxis	Pathogenicity	chemotaxis	Bacterial chemotaxis
ECs2595	0.339037	0.482306	1.40347	1.95657	2	methyl-accepting chemotaxis protein IV	chemotaxis	Stress response	chemotaxis	Bacterial chemotaxis
ECs2600	0.452823	0.447238	1.18558	2.04431	2	proton conductor component of motor	chemotaxis	Stress response	chemotaxis	Bacterial chemotaxis
ECs2593	0.291092	0.577118	1.39402	1.92786	2	response regulator for chemotaxis CheA sensor	chemotaxis	Stress response	chemotaxis	Bacterial chemotaxis
ECs2598	0.382248	0.480123	1.26129	2.0304	2	sensory transducer kinase CheA	chemotaxis	Stress response	chemotaxis	Bacterial chemotaxis
ECs5095	0.60088	0.221486	0.604988	2.59558	2	2-component regulatory system regulatory protein BasR	CAMP resistance	Pathogenicity	two-component system	Cationic antimicrobial peptide (CAMP resistance
ECs1491	0.303148	0.471268	1.05045	2.31697	2	hypothetical protein	CAMP resistance	Stress response		Cationic antimicrobial peptide (CAMP resistance
ECs5096	0.618382	0.0986214	0.392994	2.88088	2	hypothetical protein	CAMP resistance	Stress response		Cationic antimicrobial peptide (CAMP resistance
ECs3147	0.712084	0.345418	0.839591	2.13542	2	polymyxin resistance protein B	CAMP resistance	Stress response	antibiotics resistance	Cationic antimicrobial peptide (CAMP resistance
ECs3674	0.566822	0.330552	1.01046	2.17588	2	putative amidase	CAMP resistance	Stress response		Cationic antimicrobial peptide (CAMP resistance
ECs3142	0.604003	0.186188	0.949177	2.3282	2	putative sugar transferase	CAMP resistance	Stress response		Cationic antimicrobial peptide (CAMP resistance
ECs3143	0.710799	0.225872	1.04088	2.0812	2	putative transformylase	CAMP resistance	Stress response		Cationic antimicrobial peptide (CAMP resistance
ECs5094	0.436131	0.26302	0.746477	2.62876	2	sensor protein BasS for basR	CAMP resistance	Stress response	two-component system	Cationic antimicrobial peptide (CAMP resistance
ECs4640	0.474049	0.272204	1.23197	2.15279	2	60 KD inner-membrane protein	quorum sensing	Pathogenicity	quorum sensing	Quorum sensing
ECs4305	0.390446	0.281992	1.53547	1.97974	2	periplasmic binding protein of high-affinity leucine-specific transport system	quorum sensing	Pathogenicity	quorum sensing	Quorum sensing
ECs2974	0.463373	0.618291	0.9844	2.0361	2	Shiga toxin I subunit A precursor	Shiga toxin	Pathogenicity	Shiga toxin	Pathogenic Escherichia coli infection
ECs3733	0.425273	0.682545	2.08646	1.06119	2	type III secretion protein EivG	T3SS	Pathogenicity	T3SS
ECs3729	0.385829	0.474311	2.09558	1.30772	2	type III secretion protein EivI	T3SS	Pathogenicity	T3SS
ECs3722	0.378389	0.87451	2.06762	0.942687	2	type III secretion protein EpaR2	T3SS	Pathogenicity	T3SS
ECs3719	0.36711	0.467891	2.36395	1.10357	2	type III secretion protein EprH	T3SS	Pathogenicity	T3SS
ECs2303	0.431177	0.302182	2.24442	1.29548	2	acid shock protein	acid shock protein	Stress response
ECs2539	0.720011	0.354974	0.73721	2.20529	2	heat shock protein HtpX	heat shock protein	Stress response	HSP
ECs0101	0.552282	0.334267	1.13525	2.08129	2	hypothetical protein	pathogenicity	Pathogenicity	secretion	Bacterial secretion system
ECs0459	0.505295	0.359708	1.09084	2.1508	2	protein-export membrane protein SecD	pathogenicity	Pathogenicity	secretion	Bacterial secretion system
ECs1447	0.504715	0.475462	1.15064	1.98441	2	putative virulence factor	pathogenicity	Pathogenicity	secretion
ECs1677	0.539691	0.866182	2.10044	0.729288	2	hemolysin E	pathogenicity	Pathogenicity
ECs0079	0.742878	0.371004	0.681563	2.21025	2	leu operon leader peptide	pathogenicity	Pathogenicity
ECs1990	0.410954	0.247336	1.41765	2.09193	2	putative host specificity protein	pathogenicity	Pathogenicity
ECs1352	0.271584	0.188329	2.04279	1.77495	2	putative tellurium resistance protein TerA	tellurium resistance	Stress response	tellurium resistance
ECs1353	0.498226	0.204784	1.91154	1.60104	2	putative tellurium resistance protein TerB	tellurium resistance	Stress response	tellurium resistance
ECs1354	0.534485	0.316468	1.86372	1.48798	2	putative tellurium resistance protein TerC	tellurium resistance	Stress response	tellurium resistance
ECs1351	0.514417	0.196811	1.91131	1.58977	2	putative tellurium resistance protein TerZ	tellurium resistance	Stress response	tellurium resistance
ECs1343	0.41065	0.325519	1.31986	2.09938	2	TerW protein	tellurium resistance	Stress response	tellurium resistance
ECs5040	0.740942	0.558554	1.98972	0.890449	2	excision nuclease subunit A	SOS response	Nucleotide metabolism and DNA recombination		Nucleotide excision repair
ECs2570	0.720646	0.617405	1.99232	0.853937	2	Holliday junction helicase subunit A	SOS response	Nucleotide metabolism and DNA recombination		Homologous recombination
ECs1619	0.350092	0.798466	2.03402	1.08141	2	putative crossover junction endodeoxyribonuclease	SOS response	Nucleotide metabolism and DNA recombination
ECs4834	0.300815	0.773914	2.00121	1.19334	2	superoxide dismutase SodA	SOS response	Stress response	SOS response
ECs3548	0.432813	0.496176	1.99074	1.32069	2	multidrug resistance membrane translocase	stress response	Stress response
ECs3547	0.40199	0.529532	2.09317	1.2355	2	multidrug resistance secretion protein	stress response	Stress response
ECs0587	0.664257	0.810239	0.779358	1.78248	2	peptidyl-prolyl cis-trans isomerase B	stress response	Stress response
ECs2878	0.459564	0.480123	0.969151	2.19138	2	putative heat shock protein	stress response	Stress response	HSP
ECs1623	0.363254	0.655883	2.00496	1.23275	2	putative endopeptidase	endopeptidase	Amino acid and protein metabolism
ECs0921	0.454038	0.191486	0.663094	2.75087	2	hypothetical protein	peptidoglycan	Carbohydrate metabolism		Peptidoglycan biosynthesis
ECs4884	0.581903	0.247463	0.877472	2.35594	2	membrane protein	lipopolysaccharide	Stress response	lipopolysaccharide	Lipopolysaccharide biosynthesis
ECs5001	0.301882	1.06219	1.98665	0.917854	2	sorbose-permease PTS system IIB component	carbohydrate metabolism	Carbohydrate metabolism		Fructose and mannose metabolism
ECs2847	0.702294	0.405119	0.893907	2.0406	2	putative UDP-galactose 4-epimerase	carbohydrate metabolism	Carbohydrate metabolism
ECs4399	0.404053	0.831243	2.14905	0.884315	2	cytoplasmic trehalase	carbohydrate metabolism	Carbohydrate metabolism		Starch and sucrose metabolism
ECs2858	0.272219	0.536196	1.77568	1.65989	2	GDP-D-mannose dehydratase	carbohydrate metabolism	Carbohydrate metabolism		Amino sugar and nucleotide sugar metabolism
ECs2856	0.215262	0.777342	1.26238	1.93372	2	GDP-mannose mannosyl hydrolase	carbohydrate metabolism	Carbohydrate metabolism
ECs2440	0.324296	0.81621	1.81028	1.28887	2	phospho-beta-glucosidase	carbohydrate metabolism	Carbohydrate metabolism		Starch and sucrose metabolism
ECs0955	0.38821	0.768442	2.107	1.00229	2	putative dTDP-glucose enzyme	carbohydrate metabolism	Carbohydrate metabolism
ECs4941	0.376708	0.806133	1.96371	1.10294	2	putative L-sorbose 1-phosphate dehydrogenase	carbohydrate metabolism	Carbohydrate metabolism		Fructose and mannose metabolism
ECs3267	0.279618	0.504872	2.99022	0.62796	2	putative PTS system enzyme IIB component	carbohydrate metabolism	Carbohydrate metabolism
ECs4870	0.510729	0.379328	2.36911	1.0152	2	5,10-methylenetetrahydrofolate reductase	carbon metabolism	Other category		Carbon metabolism
ECs0410	0.421414	0.270201	1.80877	1.71716	2	putative esterase	carbon metabolism	Other category		Carbon metabolism
ECs4330	0.387672	0.271504	1.1574	2.32167	2	hypothetical membrane protein	membrane	Other category
ECs4336	0.374518	0.379632	1.06077	2.31372	2	hypothetical membrane protein	membrane	Other category
ECs3635	0.3281	1.00929	1.91154	1.00429	2	hypothetical membrane protein	membrane	Other category
ECs4801	0.335311	0.986627	1.85073	1.07098	2	hypothetical membrane protein	membrane	Other category
ECs0772	0.521595	0.260111	1.00377	2.30596	2	inner membrane protein TolQ	membrane	Cell division
ECs4681	0.350524	0.38517	0.733374	2.62113	2	membrane-bound ATP synthase AtpI	membrane	Other category
ECs3673	0.595466	0.381174	0.959397	2.13553	2	membrane-bound lytic murein transglycosylase A	membrane	Other category
ECs2338	0.425108	0.328505	1.03559	2.32585	2	putative membrane protein	membrane	Other category
ECs1333	0.458587	0.134911	0.6199	2.83921	2	putative membrane protein	membrane	Other category
ECs4462	0.474178	0.742009	2.15919	0.880315	2	putative membrane protein	membrane	Other category
ECs0672	0.495489	0.408513	1.14263	2.06902	2	rod shape-determining membrane protein	membrane	Other category
ECs4680	0.499176	0.453817	1.07896	2.07479	2	membrane-bound ATP synthase subunit a AtpB	membrane	Other category		Oxidative phosphorylation
ECs2110	0.252616	0.576148	0.972341	2.34094	2	putative outer membrane protein	outer membrane protein	Pathogenicity	outer membrane protein
ECs0594	0.344783	0.899214	1.82372	1.17006	2	putative outer membrane protein	outer membrane protein	Pathogenicity	outer membrane protein
ECs1317	0.686293	0.351217	1.03205	1.99349	2	putative outer membrane protein	outer membrane protein	Pathogenicity	outer membrane protein	Cationic antimicrobial peptide (CAMP resistance
ECs2350	0.770256	0.883803	0.647994	1.69634	2	putative outer membrane protein	outer membrane protein	Pathogenicity	outer membrane protein
ECs1991	0.336346	0.145752	0.983917	2.65886	2	putative outer membrane protein	outer membrane protein	Pathogenicity	outer membrane protein
ECs3221	0.444639	0.669024	2.22408	0.931989	2	putative outer membrane protein	outer membrane protein	Pathogenicity	outer membrane protein
ECs0883	0.421768	0.585796	2.48462	0.816047	2	putative outer membrane receptor for iron transport	outer membrane protein	Pathogenicity	outer membrane protein
ECs0022	0.593644	0.571664	2.25721	0.821642	2	putative outer membrane usher protein precursor	outer membrane protein	Pathogenicity	outer membrane protein
ECs1693	0.454379	0.967671	1.95329	0.858212	2	putative TonB dependent outer membrane receptor	outer membrane protein	Pathogenicity	outer membrane protein
ECs4267	0.38831	0.447776	1.09864	2.19651	2	protein of glp regulon	regulon	Transcription and RNA processing	transcriptional regulation
ECs4268	0.622674	0.402318	0.796028	2.22371	2	protein of glp regulon	regulon	Transcription and RNA processing	transcriptional regulation	Sulfur metabolism
ECs0504	0.311271	0.605121	2.18587	1.18849	2	nitrogen regulatory protein P-II 2	TF	Transcription and RNA processing	transcriptional regulation
ECs0343	0.343779	0.742009	2.01197	1.16429	2	putative ARAC-type regulatory protein	TF	Transcription and RNA processing	transcriptional regulation
ECs4883	0.33763	0.643485	1.32	1.87033	2	putative ARAC-type regulatory protein	TF	Transcription and RNA processing	transcriptional regulation
ECs0501	0.371718	0.31231	1.05338	2.39047	2	putative LRP-like transcriptional regulator	TF	Transcription and RNA processing	transcriptional regulation
ECs4493	0.480427	0.143825	0.61827	2.80559	2	putative regulator	TF	Transcription and RNA processing	transcriptional regulation
ECs5325	0.581779	0.67615	1.9931	0.961138	2	putative regulator	TF	Transcription and RNA processing	transcriptional regulation
ECs0324	0.467637	0.281452	1.61319	1.82036	2	putative regulator	TF	Transcription and RNA processing	transcriptional regulation
ECs3026	0.321637	0.837789	1.93532	1.16204	2	putative regulator protein	TF	Transcription and RNA processing	transcriptional regulation
ECs1766	0.398867	0.617301	2.04428	1.19436	2	putative regulatory protein	TF	Transcription and RNA processing	transcriptional regulation
ECs2208	0.313923	0.705366	1.8482	1.37867	2	putative regulatory protein	TF	Transcription and RNA processing	transcriptional regulation
ECs5252	0.647301	0.459836	0.900507	2.04629	2	putative transcription regulator	TF	Transcription and RNA processing	transcriptional regulation
ECs5085	0.0997167	0.840216	0.963168	2.26927	2	putative transcriptional regulator	TF	Transcription and RNA processing	transcriptional regulation
ECs4136	0.303797	0.307176	0.779708	2.71448	2	putative transcriptional regulator	TF	Transcription and RNA processing	transcriptional regulation
ECs4615	0.748271	0.642807	0.69676	1.92015	2	putative transcriptional regulator	TF	Transcription and RNA processing	transcriptional regulation
ECs3534	0.621568	0.646166	2.1442	0.812162	2	putative transcriptional regulator	TF	Transcription and RNA processing	transcriptional regulation
ECs2143	0.470125	0.598833	1.07088	1.97231	2	putative transcriptional regulator	TF	Transcription and RNA processing	transcriptional regulation
ECs3720	0.594083	0.394542	2.06352	1.16549	2	putative transcriptional regulator	TF	Transcription and RNA processing	transcriptional regulation
ECs2508	0.661206	0.933971	0.800655	1.64453	2	putative transcriptional regulator LYSR-type	TF	Transcription and RNA processing	transcriptional regulation
ECs4401	0.272788	0.750538	1.85517	1.37694	2	putative transcriptional regulator LYSR-type	TF	Transcription and RNA processing	transcriptional regulation
ECs4758	0.5013	0.508146	1.98416	1.23246	2	regulator for metE and metH	TF	Transcription and RNA processing	transcriptional regulation
ECs4287	0.483636	0.463836	2.4239	0.916007	2	regulator of gluconate operon	TF	Transcription and RNA processing	transcriptional regulation
ECs3895	0.44998	0.728425	2.1839	0.901369	2	putative ARAC-type regulatory protein	TF	Transcription and RNA processing	transcriptional regulation
ECs2328	0.53959	0.32288	1.02861	2.20038	2	repressor of malX and Y genes	TF	Transcription and RNA processing	transcriptional regulation
ECs4458	0.339037	0.884227	1.91028	1.11672	2	putative permease	transport	Transport
ECs0502	0.582063	0.332262	0.935649	2.22087	2	ATP-binding component of a transport system	transport	Transport		ABC transporters
ECs0631	0.61223	0.750857	1.9765	0.864738	2	ferric enterobactin (enterochelin) binding protein periplasmic component	transport	Transport		ABC transporters
ECs3542	0.653365	0.503339	2.37027	0.719961	2	high-affinity glycine betaine / proline transport system protein	transport	Transport		ABC transporters
ECs3801	0.555319	0.844355	2.01649	0.80516	2	hypothetical lipoprotein	transport	Transport		ABC transporters
ECs1494	0.463494	0.433934	0.965258	2.23601	2	hypothetical protein	transport	Transport		ABC transporters
ECs4072	0.378427	0.734927	1.01524	1.99502	2	hypothetical protein	transport	Transport		ABC transporters
ECs4073	0.311834	0.451231	1.09403	2.28867	2	hypothetical protein	transport	Transport		ABC transporters
ECs5087	0.308215	0.9069	1.98471	1.06647	2	periplasmic binding protein component of Pn transporter	transport	Transport		ABC transporters
ECs1698	0.36763	0.786708	1.97275	1.12528	2	putative ABC transporter permease protein	transport	Transport		ABC transporters
ECs1016	0.505111	0.902805	1.95367	0.861661	2	putative ATP-binding component of a transport system	transport	Transport		ABC transporters
ECs2101	0.465345	0.800205	2.01807	0.955484	2	putative ATP-binding component of a transport system	transport	Transport		ABC transporters
ECs3100	0.349086	0.318334	0.890399	2.55305	2	putative ATP-binding component of a transport system	transport	Transport		ABC transporters
ECs4074	0.371547	0.383007	0.691306	2.63461	2	putative ATP-binding component of a transport system	transport	Transport		ABC transporters
ECs0503	0.543145	0.30281	0.812579	2.40361	2	putative ATP-binding component of a transport system	transport	Transport		ABC transporters
ECs0070	0.642849	0.477006	2.36343	0.764698	2	putative ATP-binding component of a transport system	transport	Transport		ABC transporters
ECs1017	0.470885	0.9069	2.00496	0.854059	2	putative transport system permease protein	transport	Transport		ABC transporters
ECs0071	0.31356	0.424618	2.94757	0.704186	2	putative transport system permease protein	transport	Transport		ABC transporters
ECs4143	0.335311	0.717547	1.74792	1.42798	2	putative transport system permease protein	transport	Transport		ABC transporters
ECs0072	0.318432	0.496039	2.22281	1.25638	2	thiamin-binding periplasmic protein	transport	Transport		ABC transporters
ECs5080	0.220154	0.318004	1.03286	2.58415	2	ATP-binding component of phosphonate transport	transport	Transport
ECs5079	0.237921	0.715973	1.39527	1.8523	2	ATP-binding component of phosphonate transport	transport	Transport		Phosphonate and phosphinate metabolism
ECs0201	0.498584	0.408105	2.02265	1.30185	2	ATP-binding component of a transporter	transport	Transport		ABC transporters
ECs5088	0.417276	0.502283	2.23116	1.12453	2	ATP-binding component of phosphonate transport	transport	Transport		ABC transporters
ECs0050	0.735538	0.617921	2.08803	0.752511	2	glutathione-regulated K+ efflux antiporter	transport	Transport
ECs4380	0.461771	0.819135	2.06245	0.902402	2	heme utilization/transport protein	transport	Transport
ECs4285	0.3816	0.671341	2.3695	0.878963	2	low-affinity gluconate transport permease protein	transport	Transport
ECs0774	0.689297	0.339555	1.01496	2.01633	2	membrane spanning protein TolA	transport	Transport
ECs5219	0.19163	0.408105	0.589866	2.91319	2	Mg2+ transport ATPase	transport	Transport
ECs1694	0.342846	0.82538	1.99745	1.09505	2	molybdenum transport protein	transport	Transport
ECs0505	0.51677	0.805423	2.08151	0.833628	2	probable ammonium transporter	transport	Transport
ECs0063	0.505432	0.287109	1.49673	1.87056	2	probable ATP-dependent RNA helicase	transport	Transport
ECs3656	0.277062	0.215023	0.601129	2.99321	2	probable serine transporter	transport	Transport
ECs0922	0.322892	0.368215	0.949719	2.4833	2	proton motive force efflux pump	transport	Transport
ECs1019	0.475402	0.602369	2.17513	1.00396	2	putative aliphatic sulfonates binding protein precursor	transport	Transport		ABC transporters
ECs2500	0.432813	0.590449	2.07037	1.15776	2	putative amino acid/amine transport protein	transport	Transport
ECs2816	0.42232	0.177746	0.745748	2.73079	2	putative amino acid/amine transport protein	transport	Transport
ECs3025	0.31457	0.757308	1.83271	1.33965	2	putative channel/filament proteins	transport	Transport
ECs3738	0.442607	0.546981	0.944607	2.16647	2	putative lipoprotein	transport	Transport
ECs0983	0.333511	0.147279	0.642646	2.95697	2	putative transport	transport	Transport
ECs0984	0.468792	0.45345	0.98763	2.19083	2	putative transport	transport	Transport
ECs3970	0.54873	0.314532	1.1628	2.08126	2	putative transport protein	transport	Transport
ECs3543	0.36763	0.491693	2.01033	1.38622	2	putative transport protein	transport	Transport
ECs2369	0.240706	0.283577	0.628948	2.94439	2	putative transport protein	transport	Transport
ECs4135	0.3487	0.101141	0.330434	3.25569	2	putative transport protein	transport	Transport
ECs1252	0.353911	0.864367	2.63992	0.485331	2	putative transport protein	transport	Transport
ECs5300	0.631539	0.746858	2.12509	0.716613	2	putative transport protein	transport	Transport
ECs3266	0.442222	0.851697	2.03402	0.918096	2	putative transport protein	transport	Transport
ECs4647	0.596188	0.778166	1.95257	0.877547	2	putative transport protein	transport	Transport
ECs3125	0.281773	0.144423	0.521756	3.12671	2	sn-glycerol-3-phosphate permease	transport	Transport
ECs1721	0.489509	0.34026	1.23675	2.0624	2	sodium-calcium/proton antiporter	transport	Transport
ECs3062	0.523346	0.328675	1.2873	1.98952	2	sugar efflux transport protein	transport	Transport
ECs4318	0.373688	0.343495	0.900023	2.49019	2	zinc-transporting ATPase	transport	Transport
ECs4388	0.466937	0.781997	2.18505	0.826751	2	putative transport ATPase	transport	Transport
ECs0961	0.392314	0.571347	1.99828	1.28786	2	transmembrane water channel AqpZ protein	transport	Transport
ECs3048	0.577345	0.539704	0.949209	2.00833	2	lysine-specific permease	transport	Transport
ECs0593	0.397492	0.788064	1.96809	1.09222	2	putative chaperone		Other category
ECs3220	0.410954	0.9069	2.12648	0.820365	2	putative chaperone		Other category
ECs0522	0.550935	0.374096	1.11498	2.06086	2	adenine phosphoribosyltransferase		Nucleotide metabolism and DNA recombination		Purine metabolism
ECs0265	0.714332	0.319188	0.937143	2.07416	2	guanine-hypoxanthine phosphoribosyltransferase		Nucleotide metabolism and DNA recombination		Purine metabolism
ECs2708	0.560255	0.479345	2.86114	0.429271	2	hypothetical protein		Nucleotide metabolism and DNA recombination		Purine metabolism
ECs3922	0.292244	0.687292	1.57573	1.65912	2	hypothetical protein		Nucleotide metabolism and DNA recombination		Purine metabolism
ECs0530	0.423415	0.374004	1.1601	2.17452	2	inosine-guanosine kinase		Nucleotide metabolism and DNA recombination		Purine metabolism
ECs3538	0.493743	0.660364	2.07417	1.01192	2	ribonucleoside-diphosphate reductase 2 alpha subunit		Nucleotide metabolism and DNA recombination		Purine metabolism
ECs0036	0.53231	0.125755	1.64408	1.87101	2	carbamoyl-phosphate synthase large subunit		Nucleotide metabolism and DNA recombination		Pyrimidine metabolism
ECs0035	0.371563	0.0947461	1.68187	2.0616	2	carbamoyl-phosphate synthetase small subunit		Nucleotide metabolism and DNA recombination		Pyrimidine metabolism
ECs0993	0.350871	0.464371	1.12343	2.20332	2	cytidylate kinase		Nucleotide metabolism and DNA recombination		Pyrimidine metabolism
ECs1029	0.74438	0.37648	0.923565	1.99294	2	dihydro-orotate dehydrogenase		Nucleotide metabolism and DNA recombination		Pyrimidine metabolism
ECs1253	0.360329	0.670317	2.96063	0.392349	2	hypothetical protein		Nucleotide metabolism and DNA recombination		Pyrimidine metabolism
ECs1256	0.482615	0.668072	2.49728	0.650307	2	hypothetical protein		Nucleotide metabolism and DNA recombination		Pyrimidine metabolism
ECs1258	0.389325	0.820115	2.35031	0.738329	2	hypothetical protein		Nucleotide metabolism and DNA recombination		Pyrimidine metabolism
ECs1255	0.290603	0.746249	2.72675	0.60332	2	putative acetyltransferase		Nucleotide metabolism and DNA recombination		Pyrimidine metabolism
ECs1254	0.278436	0.867469	2.62163	0.588523	2	putative enzyme		Nucleotide metabolism and DNA recombination		Pyrimidine metabolism
ECs1257	0.323921	0.779818	2.56261	0.67249	2	putative synthetase		Nucleotide metabolism and DNA recombination		Pyrimidine metabolism
ECs3360	0.312055	0.384099	1.16551	2.29316	2	uracil phosphoribosyltransferase		Nucleotide metabolism and DNA recombination		Pyrimidine metabolism
ECs3576	0.558414	0.720185	2.06393	0.883823	2	formate hydrogenlyase subunit-7 component F		Other category
ECs2866	0.264873	0.382598	1.60815	1.96695	2	probable protein-tyrosine-phosphatase		Amino acid and protein metabolism
ECs4759	0.689752	0.676514	2.21071	0.642561	2	tetrahydropteroyltriglutamate methyltransferase		Amino acid and protein metabolism		Biosynthesis of amino acids
ECs0342	0.21559	0.675435	2.07016	1.33356	2	putative oxidoreductase		Other category
ECs0647	0.277394	0.652968	1.83727	1.48404	2	putative oxidoreductase		Other category
ECs1275	0.333479	0.695785	2.0707	1.17164	2	putative oxidoreductase		Other category
ECs2381	0.542459	0.81621	2.1208	0.758017	2	putative oxidoreductase Fe-S subunit		Other category
ECs0078	0.348967	0.273208	1.46807	2.09667	2	2-isopropylmalate synthase		Amino acid and protein metabolism		Biosynthesis of amino acids
ECs5075	0.452049	0.427538	1.24753	2.01107	2	phosphonate metabolism		Other category		Phosphonate and phosphinate metabolism
ECs5082	0.232217	0.670857	0.961283	2.28073	2	phosphonate metabolism		Other category		Phosphonate and phosphinate metabolism
ECs0077	0.468314	0.317302	1.53233	1.85407	2	3-isopropylmalate dehydrogenase		Amino acid and protein metabolism		Biosynthesis of amino acids
ECs0076	0.309555	0.369069	1.70858	1.83972	2	3-isopropylmalate isomerase (dehydratase) subunit		Amino acid and protein metabolism		Biosynthesis of amino acids
ECs1018	0.651049	0.621029	2.28827	0.676801	2	alkanesulfonate monooxygenase		Other category		Sulfur metabolism
ECs3126	0.22362	0.191028	0.527547	3.14497	2	anaerobic sn-glycerol-3-phosphate dehydrogenase large subunit		Other category		Glycerophospholipid metabolism
ECs3127	0.353901	0.357837	0.976669	2.43309	2	anaerobic sn-glycerol-3-phosphate dehydrogenase membrane anchor subunit		Other category		Glycerophospholipid metabolism
ECs1836	0.522563	0.191733	1.38622	2.04086	2	anthranilate synthase component I		Amino acid and protein metabolism		Biosynthesis of amino acids
ECs2586	0.533942	0.370646	1.03057	2.15792	2	arginine tRNA synthetase		Nucleotide metabolism and DNA recombination		Aminoacyl-tRNA biosynthesis
ECs2820	0.737387	0.50918	2.02309	0.914869	2	ATP phosphoribosyltransferase		Amino acid and protein metabolism		Biosynthesis of amino acids
ECs1612	0.255189	0.877645	2.01215	1.13528	2	replication protein P		Nucleotide metabolism and DNA recombination
ECs3205	0.45491	0.475261	1.2199	1.98414	2	cell division protein		Cell division
ECs5022	0.346882	0.753624	1.36696	1.70889	2	chorismate lyase		Other category		Ubiquinone and other terpenoid-quinone biosynthesis
ECs0588	0.420762	0.409079	0.831812	2.42776	2	cysteine tRNA synthetase		Nucleotide metabolism and DNA recombination		Aminoacyl-tRNA biosynthesis
ECs0856	0.334634	0.742009	2.02927	1.16023	2	dethiobiotin synthetase		Other category		Biotin metabolism
ECs5330	0.264772	0.411992	1.47476	2.05361	2	DNA polymerase III psi subunit		Nucleotide metabolism and DNA recombination		DNA replication
ECs1777	0.288071	1.01359	1.86518	1.08819	2	endonuclease		Nucleotide metabolism and DNA recombination
ECs0624	0.335311	0.627854	1.57655	1.66597	2	enterochelin esterase		Other category
ECs0476	0.314253	0.623954	1.41487	1.83542	2	exonuclease VII small subunit		Nucleotide metabolism and DNA recombination		Mismatch repair
ECs1934	0.602732	0.108828	2.28714	1.24531	2	exonuclease VIII RecE		Nucleotide metabolism and DNA recombination
ECs0046	0.321193	0.859168	1.77281	1.28236	2	flavoprotein		Other category
ECs4683	0.559203	0.323099	1.63143	1.65341	2	glucose-inhibited division protein GidA		Cell division
ECs3536	0.390588	0.58627	1.98127	1.28984	2	glutaredoxin-like protein		Other category
ECs4852	0.166876	0.226316	0.59025	3.12339	2	glycerol facilitator protein		Other category
ECs4851	0.511779	0.404224	0.987918	2.18807	2	glycerol kinase		Other category		Glycerolipid metabolism
ECs3343	0.315383	0.759265	1.84954	1.32212	2	hydrogenase 4 Fe-S subunit		Other category
ECs4337	0.383582	0.44683	1.19517	2.11933	2	hypothetical lipoprotein		Other category
ECs0546	0.496152	0.398151	2.12993	1.22154	2	hypothetical lipoprotein		Other category
ECs2823	0.570241	0.51621	2.12901	1.01613	2	imidazoleglycerolphosphate dehydratase / histidinol-phosphate phosphatase		Amino acid and protein metabolism		Biosynthesis of amino acids
ECs1688	0.326381	0.673493	1.38785	1.79505	2	L, D-carboxyprptidase		Other category
ECs2821	0.534688	0.447011	2.36996	0.918418	2	L-histidinal:NAD+ oxidoreductase		Amino acid and protein metabolism		Biosynthesis of amino acids
ECs2825	0.649592	0.541333	1.95818	1.04438	2	N-(5'-phospho-L-ribosyl-formimino)-5-amino-1- (5'- phosphoribosyl)-4-imidazolecarboxamide isomerase		Amino acid and protein metabolism		Biosynthesis of amino acids
ECs2359	0.395234	0.837519	2.34054	0.722414	2	N-ethylmaleimide reductase		Other category		Nitrotoluene degradation
ECs2784	0.349896	1.06504	2.15321	0.712929	2	nitrogen assimilation control protein		Other category
ECs3763	0.374864	0.44418	1.38206	1.97019	2	peptide chain release factor RF-2		Amino acid and protein metabolism
ECs5319	0.529745	0.212555	0.74722	2.5662	2	phosphoglycerol transferase I		Other category
ECs5083	0.255877	0.616007	0.70615	2.52843	2	phosphonate metabolism		Other category		Phosphonate and phosphinate metabolism
ECs5084	0.116909	0.187634	0.806594	3.03394	2	phosphonate metabolism		Other category		Phosphonate and phosphinate metabolism
ECs1468	0.526314	0.540647	0.943294	2.07365	2	PlsX protein		Other category		Glycerolipid metabolism
ECs0147	0.400847	0.360959	1.05978	2.30161	2	poly(A) polymerase I		Nucleotide metabolism and DNA recombination		RNA degradation
ECs0112	0.312957	0.81621	1.79933	1.31195	2	prelipin peptidase dependent protein		Amino acid and protein metabolism
ECs2362	0.408385	0.85331	2.169	0.839849	2	probable ATP-dependent helicase Lhr		Nucleotide metabolism and DNA recombination
ECs4338	0.335505	0.425109	1.26702	2.13615	2	putative 3-oxoacyl-(acyl-carrier-protein) synthase II		Other category		Fatty acid metabolism
ECs4341	0.472668	0.421451	1.24002	1.99895	2	putative 3-oxoacyl-(acyl-carrier-protein) synthase II		Other category		Fatty acid metabolism
ECs4328	0.666243	0.254831	1.02243	2.12176	2	putative acyl carrier protein		Other category
ECs4329	0.731761	0.221315	1.06554	2.03921	2	putative acyl carrier protein		Other category
ECs1288	0.332389	0.853553	1.77345	1.27398	2	putative aminomethyltransferase		Other category
ECs1958	0.453091	0.16926	1.54145	2.01169	2	putative antitermination protein		Nucleotide metabolism and DNA recombination
ECs0875	0.428838	0.260656	1.57016	1.92488	2	putative ATP-dependent RNA helicase		Transcription and RNA processing	transcriptional regulation	RNA degradation
ECs4339	0.335206	0.415022	1.53298	1.91569	2	putative beta-hydroxydecanoyl-ACP dehydrase		Other category
ECs0742	0.488008	0.680175	1.98471	1.07673	2	putative chaperone		Other category
ECs2860	0.3281	0.526587	1.55942	1.79025	2	putative colanic acid biosynthesis glycosyl transferase		Other category
ECs2194	0.360149	0.53816	2.0221	1.33873	2	putative crossover junction endodeoxyribonuclease		Nucleotide metabolism and DNA recombination
ECs2712	0.784326	0.220364	0.911379	2.11102	2	putative cytochrome		Other category
ECs3986	0.569582	0.652968	2.05843	0.942107	2	putative cytochrome		Other category
ECs2583	0.594188	0.673163	2.07386	0.879144	2	putative cytochrome C-type protein		Other category
ECs4132	0.508073	0.173688	0.919805	2.48103	2	putative dehydrogenase		Other category
ECs3063	0.553781	0.399958	1.08678	2.0562	2	putative elongation factor		Nucleotide metabolism and DNA recombination
ECs2184		0.709747	2.23742	1.41245	2	putative endopeptidase		Amino acid and protein metabolism
ECs3441	0.456734	0.324228	1.26046	2.09703	2	putative enzyme		Other category
ECs3254	0.43841	0.844355	2.05681	0.910181	2	putative enzyme		Other category
ECs0426	0.405032	0.354577	0.734762	2.58508	2	putative enzyme		Other category
ECs0963	0.253885	0.113315	0.312933	3.37233	2	putative enzyme		Other category
ECs3966	0.40255	0.387646	1.30843	2.05719	2	putative enzyme		Other category
ECs2013	0.559325	0.590405	2.39255	0.726617	2	putative enzymes		Other category
ECs1725	0.419173	0.593607	2.00739	1.22563	2	putative factor		Other category
ECs3941	0.307587	0.499211	1.13499	2.21047	2	putative kinase		Other category		Folate biosynthesis
ECs1953	0.644483	0.0611217	0.781504	2.5497	2	putative methyltransferase		Amino acid and protein metabolism		Cysteine and methionine metabolism
ECs0049	0.647841	0.493885	1.98155	1.0734	2	putative NAD(P)H oxidoreductase		Other category
ECs2295	0.500218	0.758227	1.99401	0.976369	2	putative oxidoreductase Fe-S subunit		Other category
ECs3265	0.350728	0.562903	2.5811	0.840167	2	putative peptidase		Amino acid and protein metabolism
ECs2011	0.398867	0.812516	2.07452	0.973859	2	putative phosphatidate cytidiltransferase		Other category		Glycerophospholipid metabolism
ECs0488	0.442148	0.373993	0.987001	2.30235	2	putative polymerase/proteinase		Amino acid and protein metabolism
ECs2709	0.348155	0.658555	2.68799	0.655289	2	putative reductase		Other category
ECs2545	0.51079	0.553362	2.09684	1.07829	2	putative rRNA methylase		Transcription and RNA processing	transcriptional regulation
ECs3182	0.529745	0.637664	1.998	1.0575	2	putative S-transferase		Other category
ECs1830	0.242939	0.126898	2.42964	1.53459	2	putative structural proteins		Cell division
ECs3080	0.644116	0.428218	0.89623	2.08528	2	putative sulfatase		Other category
ECs4331	0.396277	0.424005	1.19488	2.12709	2	putative surfactin synthetase		Other category
ECs2859	0.114282	0.550254	1.83976	1.77946	2	putative transferase		Other category
ECs1929	0.401898	0.0992352	1.50728	2.17235	2	putative transposase		Nucleotide metabolism and DNA recombination
ECs2744	0.464215	0.477856	0.68252	2.43687	2	putative transposase OrfA protein of insertion sequence IS629		Nucleotide metabolism and DNA recombination
ECs2478	0.41976	0.466405	1.14569	2.09947	2	putative transposase OrfB protein of insertion sequence IS629		Nucleotide metabolism and DNA recombination
ECs2636	0.382697	0.35036	0.929699	2.44681	2	putative transposase OrfB protein of insertion sequence IS629		Nucleotide metabolism and DNA recombination
ECs3290	0.729112	0.757966	1.9527	0.738329	2	pyridoxal/pyridoxine/pyridoxamine kinase		Other category		Vitamin B6 metabolism
ECs0957	0.331398	0.630743	2.40222	0.951087	2	pyruvate oxidase		Other category		Pyruvate metabolism
ECs0778	0.333935	0.524786	1.36316	1.95541	2	quinolinate synthetase A protein		Other category		Nicotinate and nicotinamide metabolism
ECs1933	0.535321		2.15446	1.54952	2	recombinase recT protein		Nucleotide metabolism and DNA recombination
ECs4639	0.406397	0.284237	1.50911	1.98128	2	ribonuclease P protein component		Nucleotide metabolism and DNA recombination
ECs4518	0.492048	0.343909	1.27907	2.019	2	RNase PH		Nucleotide metabolism and DNA recombination
ECs2361	0.405024	0.493013	2.07852	1.28093	2	RNase T		Nucleotide metabolism and DNA recombination
ECs4133	0.56654	0.202887	1.31979	2.03475	2	site-specific DNA inversion stimulation factor		Nucleotide metabolism and DNA recombination
ECs4269	0.300907	0.520428	0.734489	2.545	2	sn-glycerol-3-phosphate dehydrogenase		Other category		Glycerophospholipid metabolism
ECs4915	0.419427	0.841453	1.9774	1.00474	2	thiamin biosynthesis protein ThiF		Other category		Thiamine metabolism
ECs0457	0.430267	0.437601	1.12868	2.1303	2	tRNA-guanine transglycosylase		Nucleotide metabolism and DNA recombination
ECs4717	0.685895	0.398328	0.944366	2.0232	2	UDP-GlcNAc:undecaprenylphosphate GlcNAc-1-phosphate transferase		Other category
ECs0176	0.627347	0.382392	0.905767	2.14269	2	undecaprenyl pyrophosphate synthetase		Other category		Terpenoid backbone biosynthesis
ECs1326	0.571271	0.597956	1.98783	1.05611	2	urease accessory protein UreF		Nucleotide metabolism and DNA recombination
ECs4219	0.477898	0.542693	1.13223	1.9656	2	uroporphyrinogen III methylase		Other category		Porphyrin and chlorophyll metabolism
ECs3942	0.442351	0.414537	0.786535	2.43577	2	hypothetical protein		Other category		Glycerolipid metabolism
ECs4319	0.707475	0.28018	0.663491	2.35872	2	hypothetical protein		Other category		Sulfur relay system
ECs1753	0.734659	0.366321	0.810327	2.11299	2	hypothetical protein		Other category		Biosynthesis of unsaturated fatty acids
ECs3557	0.384022	0.58112	1.07494	2.08954	2	hypothetical protein		Other category		Nicotinate and nicotinamide metabolism
ECs0085	0.416666	0.579388	0.945751	2.1643	2	hypothetical protein		Unknown
ECs0222	0.287862	0.693008	1.10336	2.06871	2	hypothetical protein		Unknown
ECs0915	0.417686	0.353013	0.999416	2.34175	2	hypothetical protein		Unknown
ECs1464	0.463885	0.441194	0.995708	2.20189	2	hypothetical protein		Unknown
ECs1674	0.451012	0.688585	0.859327	2.08953	2	hypothetical protein		Unknown
ECs2289	0.305697	0.476341	1.03066	2.32605	2	hypothetical protein		Unknown
ECs2337	0.448609	0.30584	1.04631	2.31095	2	hypothetical protein		Unknown
ECs2339	0.393951	0.273028	0.938944	2.50226	2	hypothetical protein		Unknown
ECs2340	0.447487	0.266155	0.893516	2.48441	2	hypothetical protein		Unknown
ECs2516	0.459568	0.441742	0.98954	2.21187	2	hypothetical protein		Unknown
ECs2748	0.306797	0.870039	0.96148	1.99303	2	hypothetical protein		Unknown
ECs2749	0.479708	0.546221	1.10024	1.9877	2	hypothetical protein		Unknown
ECs3068	0.392509	0.369759	1.09892	2.26887	2	hypothetical protein		Unknown
ECs3474	0.556848	0.391496	1.11516	2.03631	2	hypothetical protein		Unknown
ECs3838	0.453376	0.606966	1.06809	1.9867	2	hypothetical protein		Unknown
ECs3847	0.36053	0.684348	1.0715	2.01795	2	hypothetical protein		Unknown
ECs3925	0.4102	0.629257	1.0835	2.00286	2	hypothetical protein		Unknown
ECs0005	0.53847	0.249664	1.20534	2.12117	2	hypothetical protein		Unknown
ECs3938	0.448856	0.343216	1.08964	2.23585	2	hypothetical protein		Unknown
ECs4069	0.427216	0.417984	1.07446	2.20055	2	hypothetical protein		Unknown
ECs4326	0.549311	0.355492	1.19809	2.00918	2	hypothetical protein		Unknown
ECs4333	0.3689	0.380616	1.23622	2.16717	2	hypothetical protein		Unknown
ECs4335	0.248379	0.478365	1.23382	2.21634	2	hypothetical protein		Unknown
ECs4535	0.429863	0.492396	0.880161	2.29199	2	hypothetical protein		Unknown
ECs0243	0.496418	0.459651	2.00227	1.27084	2	hypothetical protein		Unknown
ECs0322	0.336449	0.623061	1.8213	1.45693	2	hypothetical protein		Unknown
ECs1336	0.398867	0.517056	1.96867	1.35973	2	hypothetical protein		Unknown
ECs1345	0.328916	0.441606	2.00746	1.48492	2	hypothetical protein		Unknown
ECs1346	0.323442	0.333714	2.14386	1.48043	2	hypothetical protein		Unknown
ECs1348	0.289422	0.341272	2.11092	1.54226	2	hypothetical protein		Unknown
ECs1349	0.198725	0.23196	2.22694	1.65894	2	hypothetical protein		Unknown
ECs1350	0.263089	0.262908	1.88363	1.84906	2	hypothetical protein		Unknown
ECs1604	0.334424	0.508974	1.95192	1.4595	2	hypothetical protein		Unknown
ECs1831	0.633568	0.157532	2.01674	1.39463	2	hypothetical protein		Unknown
ECs1930	0.406844	0.0466405	2.43269	1.41548	2	hypothetical protein		Unknown
ECs1948	0.339037	0.09069	2.18318	1.66944	2	hypothetical protein		Unknown
ECs1949	0.237921		2.29809	1.78106	2	hypothetical protein		Unknown
ECs1950	0.333479	0.133805	2.30078	1.53112	2	hypothetical protein		Unknown
ECs1951	0.27123		2.52625	1.54311	2	hypothetical protein		Unknown
ECs1957	0.470197	0.119155	1.84398	1.77846	2	hypothetical protein		Unknown
ECs1979	0.365628	0.320082	1.83461	1.71191	2	hypothetical protein		Unknown
ECs3255	0.452049	0.567798	1.97978	1.2359	2	hypothetical protein		Unknown
ECs3269	0.408955	0.539905	1.95989	1.33253	2	hypothetical protein		Unknown
ECs3449	0.512721	0.493737	1.95443	1.25893	2	hypothetical protein		Unknown
ECs3713	0.411548	0.424618	2.0011	1.40837	2	hypothetical protein		Unknown
ECs3714	0.454985	0.388671	1.96446	1.42392	2	hypothetical protein		Unknown
ECs4579	0.527391	0.3023	2.23516	1.18816	2	hypothetical protein		Unknown
ECs4658	0.325828	0.339204	2.12648	1.4872	2	hypothetical protein		Unknown
ECs0683	0.376708	0.78598	1.97526	1.11296	2	hypothetical protein		Unknown
ECs0865	0.459711	0.913048	2.02988	0.839692	2	hypothetical protein		Unknown
ECs0950	0.319094	0.768197	2.20153	1.00326	2	hypothetical protein		Unknown
ECs1314	0.280859	0.821039	2.26992	0.937109	2	hypothetical protein		Unknown
ECs1528	0.342846	0.917089	1.94489	1.04942	2	hypothetical protein		Unknown
ECs1579	0.371547	0.838572	2.0187	1.02911	2	hypothetical protein		Unknown
ECs2012	0.324296	0.709747	2.19674	1.05934	2	hypothetical protein		Unknown
ECs2105	0.459711	0.830044	2.0616	0.894754	2	hypothetical protein		Unknown
ECs2761	0.471508	0.810804	2.01381	0.941247	2	hypothetical protein		Unknown
ECs2931	0.406844	0.652968	1.96486	1.21824	2	hypothetical protein		Unknown
ECs3264	0.380552	0.832867	1.95723	1.07736	2	hypothetical protein		Unknown
ECs3503	0.299701	0.766606	2.22281	1.00959	2	hypothetical protein		Unknown
ECs3946	0.27564	0.796302	1.82566	1.3536	2	hypothetical protein		Unknown
ECs4463	0.327572	0.709747	2.10182	1.13781	2	hypothetical protein		Unknown
ECs4591	0.389325	0.702956	2.03694	1.12692	2	hypothetical protein		Unknown
ECs4593	0.185543	1.0964	1.97836	1.03035	2	hypothetical protein		Unknown
ECs4815	0.35151	0.818939	2.01837	1.07292	2	hypothetical protein		Unknown
ECs5161	0.322892	0.777342	1.89358	1.25692	2	hypothetical protein		Unknown
ECs5288	0.403615	0.9069	1.96783	0.966859	2	hypothetical protein		Unknown
ECs0674	0.392274	0.298731	0.880968	2.52902	2	hypothetical protein		Unknown
ECs1413	0.371853	0.179042	0.799163	2.74358	2	hypothetical protein		Unknown
ECs2341	0.406662	0.242003	0.888993	2.56126	2	hypothetical protein		Unknown
ECs0251	0.54427	0.295873	0.893827	2.33864	2	hypothetical protein		Unknown
ECs0304	0.462584	0.338934	0.800852	2.47434	2	hypothetical protein		Unknown
ECs0432	0.524151	0.86575	0.754328	1.91678	2	hypothetical protein		Unknown
ECs0549	0.61874	0.232364	0.635075	2.53724	2	hypothetical protein		Unknown
ECs0675	0.596311	0.287116	0.677912	2.47244	2	hypothetical protein		Unknown
ECs0771	0.698533	0.22047	0.884565	2.23694	2	hypothetical protein		Unknown
ECs0896	0.602847	0.272897	1.16601	2.05509	2	hypothetical protein		Unknown
ECs1137	0.681135	0.313218	1.10356	1.9754	2	hypothetical protein		Unknown
ECs1319	0.693163	0.391644	0.920684	2.0417	2	hypothetical protein		Unknown
ECs1848	0.52851	1.05475	0.625674	1.83517	2	hypothetical protein		Unknown
ECs1955	0.765158	0.0915946	1.04998	2.1418	2	hypothetical protein		Unknown
ECs1960	0.637879	0.294509	1.00076	2.13506	2	hypothetical protein		Unknown
ECs2040	0.665689	0.596318	0.801069	1.97478	2	hypothetical protein		Unknown
ECs2144	0.576078	0.416061	0.835072	2.23196	2	hypothetical protein		Unknown
ECs2335	0.574477	0.402262	0.949703	2.1481	2	hypothetical protein		Unknown
ECs2336	0.577651	0.299526	0.855328	2.32844	2	hypothetical protein		Unknown
ECs3066	0.752149	0.288074	0.864886	2.12254	2	hypothetical protein		Unknown
ECs3138	0.544655	0.3151	0.961283	2.2605	2	hypothetical protein		Unknown
ECs3379	0.591878	0.355074	0.940935	2.18182	2	hypothetical protein		Unknown
ECs3428	0.763911	0.276849	1.07109	1.94063	2	hypothetical protein		Unknown
ECs3816	0.71639	0.38026	0.802909	2.12744	2	hypothetical protein		Unknown
ECs3965	0.772934	0.329867	0.77082	2.13771	2	hypothetical protein		Unknown
ECs3977	0.515446	0.475569	0.867187	2.21749	2	hypothetical protein		Unknown
ECs3978	0.551675	0.505859	0.887736	2.12612	2	hypothetical protein		Unknown
ECs5032	0.596017	0.493864	0.806165	2.15575	2	hypothetical protein		Unknown
ECs5228	0.641887	0.331877	0.986771	2.10522	2	hypothetical protein		Unknown
ECs0261	0.319846	0.641674	2.70691	0.689571	2	hypothetical protein		Unknown
ECs0262	0.292502	0.608156	2.80695	0.668839	2	hypothetical protein		Unknown
ECs1580	0.357778	0.574218	2.4214	0.959085	2	hypothetical protein		Unknown
ECs1618	0.224363	0.600154	2.9583	0.627036	2	hypothetical protein		Unknown
ECs1931	0.446307	0.0565503	2.76589	1.06913	2	hypothetical protein		Unknown
ECs2059	0.470885	0.45345	2.46907	0.902402	2	hypothetical protein		Unknown
ECs2358	0.499474	0.674102	2.36784	0.736475	2	hypothetical protein		Unknown
ECs3504	0.295426	0.71122	2.36824	0.94359	2	hypothetical protein		Unknown
ECs3905	0.49802	0.755109	2.37877	0.648123	2	hypothetical protein		Unknown
ECs4479	0.479915	0.559048	2.54206	0.723158	2	hypothetical protein		Unknown
ECs5030	0.581104	0.29181	2.50884	0.896708	2	hypothetical protein		Unknown
ECs0231	0.523205	0.654983	1.96371	1.07787	2	hypothetical protein		Unknown
ECs0232	0.63417	0.587201	1.98573	0.993291	2	hypothetical protein		Unknown
ECs0442	0.495668	0.715973	2.0245	0.997391	2	hypothetical protein		Unknown
ECs0912	0.67247	0.674553	2.01049	0.83901	2	hypothetical protein		Unknown
ECs0928	0.572802	0.633587	2.12194	0.902402	2	hypothetical protein		Unknown
ECs1058	0.732192	0.383197	1.99869	1.06763	2	hypothetical protein		Unknown
ECs1281	0.738226	0.460763	2.07503	0.916957	2	hypothetical protein		Unknown
ECs1304	0.443977	0.680175	2.19989	0.942687	2	hypothetical protein		Unknown
ECs1313	0.550269	0.598269	2.08194	0.999256	2	hypothetical protein		Unknown
ECs1616	0.601129	0.578872	2.25618	0.806402	2	hypothetical protein		Unknown
ECs1829	0.826181	0.127977	2.04724	1.16686	2	hypothetical protein		Unknown
ECs2531	0.546226	0.57437	1.9666	1.128	2	hypothetical protein		Unknown
ECs2572	0.574639	0.636367	2.17261	0.853458	2	hypothetical protein		Unknown
ECs2669	0.600342	0.651631	1.9776	0.976755	2	hypothetical protein		Unknown
ECs2806	0.591969	0.475043	2.22774	0.945373	2	hypothetical protein		Unknown
ECs3444	0.664778	0.784201	1.96303	0.780312	2	hypothetical protein		Unknown
ECs3535	0.724091	0.700539	2.00763	0.753803	2	hypothetical protein		Unknown
ECs3537	0.499686	0.631555	2.18916	0.933657	2	hypothetical protein		Unknown
ECs3705	0.713762	0.406974	1.98275	1.07988	2	hypothetical protein		Unknown
ECs3706	0.527949	0.76952	2.017	0.911961	2	hypothetical protein		Unknown
ECs3990	0.579161	0.532651	2.29872	0.84178	2	hypothetical protein		Unknown
ECs4288	0.650949	0.567661	2.38585	0.645327	2	hypothetical protein		Unknown
ECs4291	0.616431	0.523771	1.97637	1.08578	2	hypothetical protein		Unknown
ECs4747	0.810892	0.302923	2.00634	1.0466	2	hypothetical protein		Unknown
ECs4812	0.552177	0.611493	2.14864	0.925917	2	hypothetical protein		Unknown
ECs5189	0.628579	0.405126	2.38351	0.835874	2	hypothetical protein		Unknown
ECs5284	0.574975	0.715973	2.07922	0.854907	2	hypothetical protein		Unknown
ECs5294	0.698778	0.456911	2.1189	0.929956	2	hypothetical protein		Unknown
ECs0340	0.249234	0.371437	1.70862	1.90957	2	hypothetical protein		Unknown
ECs1141	0.434525	0.322868	1.6285	1.80552	2	hypothetical protein		Unknown
ECs1344	0.310005	0.331696	1.31045	2.22195	2	hypothetical protein		Unknown
ECs1944	0.330768	0.0663585	1.82566	2.0139	2	hypothetical protein		Unknown
ECs1963	0.364255	0.404732	1.32744	2.06956	2	hypothetical protein		Unknown
ECs1975	0.464158	0.194336	1.42018	2.07875	2	hypothetical protein		Unknown
ECs1976	0.3281	0.19747	1.77321	1.93216	2	hypothetical protein		Unknown
ECs1993	0.463829	0.292453	1.52386	1.89152	2	hypothetical protein		Unknown
ECs2556	0.306304	0.590408	1.56218	1.75045	2	hypothetical protein		Unknown
ECs3651	0.324437	0.527217	1.52211	1.82639	2	hypothetical protein		Unknown
ECs3900	0.382187	0.326484	1.31558	2.13623	2	hypothetical protein		Unknown
ECs4334	0.27866	0.521778	1.32443	2.05822	2	hypothetical protein		Unknown
ECs4586	0.569987	0.274442	1.42153	1.87111	2	hypothetical protein		Unknown
ECs5715	0.27123	0.979452	2.10946	0.930294	2	#N/A		Unknown
ECs5771	0.371208	0.774505	1.98057	1.12636	2	#N/A		Unknown
ECs5774	0.352246	0.129557	0.816837	2.80096	2	#N/A		Unknown
ECs5725	0.723691	0.975357	0.588915	1.7123	2	#N/A		Unknown
ECs5729	0.567857	0.932424	0.31527	2.1792	2	#N/A		Unknown
ECs5744	0.515824	0.349965	0.867061	2.34213	2	#N/A		Unknown
ECs5755	0.785199	0.252321	1.0587	1.9503	2	#N/A		Unknown
ECs5749	0.652252	0.733026	2.18414	0.654306	2	#N/A		Unknown
ECs5766	0.632237	0.361491	2.05014	1.16429	2	#N/A		Unknown
ECs5773	0.728929	0.204052	2.26895	1.0152	2	#N/A		Unknown
ECs4210	0.583367	0.277416	1.65465	1.64977	3	acetylornithine delta-aminotransferase	antibiotics biosynthesis	Stress response	antibiotics biosynthesis	Biosynthesis of antibiotics
ECs1835	0.631863	0.249744	1.50411	1.74989	3	anthranilate synthase component II	antibiotics biosynthesis	Stress response	antibiotics biosynthesis	Biosynthesis of antibiotics
ECs4889	0.584424	0.219998	1.54931	1.79707	3	argininosuccinate lyase	antibiotics biosynthesis	Stress response	antibiotics biosynthesis	Biosynthesis of antibiotics
ECs4052	0.635754	0.184305	1.5137	1.80202	3	argininosuccinate synthetase	antibiotics biosynthesis	Stress response	antibiotics biosynthesis	Biosynthesis of antibiotics
ECs3695	1.05234	0.294781	1.34529	1.33931	3	diaminopimelate decarboxylase	antibiotics biosynthesis	Stress response	antibiotics biosynthesis	Biosynthesis of antibiotics
ECs4708	0.614045	0.265331	1.26371	1.9644	3	ketol-acid reductoisomerase	antibiotics biosynthesis	Stress response	antibiotics biosynthesis	Biosynthesis of antibiotics
ECs4887	0.636356	0.121617	1.47172	1.90012	3	N-acetyl-gamma-glutamylphosphate reductase	antibiotics biosynthesis	Stress response	antibiotics biosynthesis	Biosynthesis of antibiotics
ECs3675	0.644607	0.20668	1.38942	1.87703	3	N-acetylglutamate synthase	antibiotics biosynthesis	Stress response	antibiotics biosynthesis	Biosynthesis of antibiotics
ECs5231	0.609853	0.113111	1.67006	1.76816	3	ornithine carbamoyltransferase 1	antibiotics biosynthesis	Stress response	antibiotics biosynthesis	Biosynthesis of antibiotics
ECs1012	0.807697	0.608711	0.470468	2.07932	3	outer membrane protein 1a	antibiotics resistance	Pathogenicity	antibiotics resistance	beta-Lactam resistance
ECs3144	1.23955	0.19758	0.676875	1.792	3	hypothetical protein	CAMP resistance	Stress response		Cationic antimicrobial peptide (CAMP resistance
ECs3145	0.925206	0.160157	0.60178	2.27092	3	hypothetical protein	CAMP resistance	Stress response		Cationic antimicrobial peptide (CAMP resistance
ECs4425	0.929221	0.227546	0.956991	1.89073	3	hypothetical protein	CAMP resistance	Stress response		Cationic antimicrobial peptide (CAMP resistance
ECs4783	0.832787	0.432143	0.774112	1.96139	3	protein disulfide isomerase I	CAMP resistance	Stress response		Cationic antimicrobial peptide (CAMP resistance
ECs3146	0.931534	0.286138	0.797475	1.96812	3	putative transport/receptor protein	CAMP resistance	Stress response		Cationic antimicrobial peptide (CAMP resistance
ECs2689	0.697022	0.293249	1.22325	1.87235	3	flagellar biosynthetic protein FliR	flagellar	Cell motility	cell motility	Flagellar assembly
ECs0014	0.853757	0.249018	1.56383	1.433	3	heat shock protein DnaK	heat shock protein	Stress response	HSP	RNA degradation
ECs1837	0.859119	0.198542	0.974	1.98879	3	trp operon leader peptide	pathogenicity	Pathogenicity
ECs3141	0.938148	0.18545	0.514061	2.3064	3	putative enzyme	two-component system	Pathogenicity	two-component system	Two-component system
ECs4588	0.813773	0.274784	1.01206	1.9342	3	Ler protein	quorum sensing	Pathogenicity	quorum sensing	Quorum sensing
ECs4054	0.984407	0.247204	0.596598	2.1179	3	protein-export protein SecG	quorum sensing	Pathogenicity	quorum sensing	Quorum sensing
ECs4583	0.824264	0.262086	1.51292	1.49952	3	type III secretion system EscR protein	T3SS	Pathogenicity	T3SS	Bacterial secretion system
ECs4581	0.806861	0.242808	1.53087	1.52396	3	type III secretion system EscT protein	T3SS	Pathogenicity	T3SS	Bacterial secretion system
ECs3107	0.995155	0.391286	0.806594	1.77938	3	sensor for ctr capsule biosynthesis	biofilm formation	Pathogenicity	biofilm formation	Biofilm formation - Escherichia coli
ECs3140	1.31258	0.0538415	0.217884	2.24597	3	aluminum-inducible protein	stress response	Stress response
ECs0015	0.825411	0.265381	1.50438	1.50227	3	DnaJ protein	stress response	Stress response
ECs2828	1.06819	0.15531	0.495141	2.19705	3	regulator of length of O-antigen component of lipopolysaccharide chains	lipopolysaccharide	Transcription and RNA processing	lipopolysaccharide
ECs0892	0.906528	0.4661	0.689103	1.91307	3	outer membrane protein X	outer membrane protein	Pathogenicity	outer membrane protein
ECs3819	0.727014	0.213444	1.57083	1.61413	3	galactose-proton symport of transport system	carbohydrate metabolism	Transport
ECs2329	1.02036	0.283814	0.847021	1.82103	3	PTS system, maltose and glucose-specific II ABC	carbohydrate metabolism	Carbohydrate metabolism		Starch and sucrose metabolism
ECs2829	1.13043	0.15604	0.400278	2.20413	3	UDP-glucose 6-dehydrogenase	carbohydrate metabolism	Carbohydrate metabolism		Amino sugar and nucleotide sugar metabolism
ECs0649	0.862944	0.404603	0.636253	2.07234	3	regulator of nucleoside diphosphate kinase	TF	Transcription and RNA processing	transcriptional regulation
ECs0117	0.826627	0.322062	1.68064	1.29142	3	transcriptional regulator for pyruvate dehydrogenase complex	TF	Transcription and RNA processing	transcriptional regulation
ECs1942	0.966553	0.0357987	1.33371	1.70981	3	regulatory protein	TF	Transcription and RNA processing	transcriptional regulation
ECs1941	1.01585	0.0932811	1.02863	1.85839	3	putative transcriptional regulator	TF	Transcription and RNA processing	transcriptional regulation
ECs0513	0.898763	0.433947	0.806695	1.85229	3	haemolysin expression modulating protein	TF	Transcription and RNA processing	transcriptional regulation
ECs0943	0.962636	0.11332	1.15393	1.79342	3	arginine 3rd transport system periplasmic binding protein	transport	Transport		ABC transporters
ECs1054	0.802113	0.476086	0.796463	1.93501	3	putative carrier/transport protein	transport	Transport
ECs3840	0.993542	0.259348	0.910074	1.82277	3	transport of nucleosides, permease protein	transport	Transport
ECs5137	0.913615	0.326484	1.24097	1.56448	3	putative transport	transport	Transport
ECs3285	1.08574	0.403408	0.741171	1.7156	3	required for sulfate transport	transport	Transport
ECs0518	0.844382	0.448297	0.801858	1.90735	3	mechanosensitive channel protein	transport	Transport
ECs3272	0.95209	0.461214	0.751003	1.80963	3	permease of transport system for 3 nucleosides	transport	Transport
ECs0773	0.879654	0.323251	0.840873	1.95566	3	putative inner membrane protein TolR		Other category
ECs4239	0.875238	0.359091	0.748756	2.00525	3	hypothetical protein		Nucleotide metabolism and DNA recombination		Purine metabolism
ECs2873	0.841979	0.315313	1.00691	1.86457	3	uridine/cytidine kinase		Nucleotide metabolism and DNA recombination		Pyrimidine metabolism
ECs4240	0.976835	0.296672	0.763118	1.9332	3	putative dehydrogenase		Other category
ECs3067	0.965091	0.464348	0.660866	1.86918	3	putative lipoprotein		Transport
ECs5025	0.967968	0.239007	0.554814	2.18202	3	diacylglycerol kinase		Other category		Glycerolipid metabolism
ECs3124	0.850859	0.283139	0.697229	2.15475	3	glycerophosphodiester phosphodiesterase		Other category		Glycerophospholipid metabolism
ECs4043	0.829765	0.242418	1.4479	1.56894	3	inducible ATP-independent RNA helicase		Transcription and RNA processing	transcriptional regulation	RNA degradation
ECs3620	0.835066	0.294854	0.70673	2.15376	3	putative 6-pyruvoyl tetrahydrobiopterin synthase		Other category		Folate biosynthesis
ECs0893	0.901776	0.242254	1.07343	1.80789	3	putative enzyme		Other category
ECs4325	0.869634	0.328027	0.945603	1.872	3	putative O-methyltransferase		Other category
ECs5226	1.05691	0.130887	1.30235	1.5342	3	putative oxidoreductase		Other category
ECs5318	0.760356	0.22298	1.19483	1.89109	3	putative oxidoreductase		Other category
ECs1996	0.966357	0.156399	0.991676	1.88694	3	hypothetical protein		Unknown
ECs2396	0.870255	0.611066	0.775538	1.73724	3	hypothetical protein		Unknown
ECs0285	0.937249	0.451636	0.691341	1.88873	3	hypothetical protein		Unknown
ECs2495	0.891895	0.295354	0.94586	1.87763	3	hypothetical protein		Unknown
ECs2587	1.03646	0.321604	0.800895	1.80419	3	hypothetical protein		Unknown
ECs2630	0.826224	0.320082	0.655216	2.18396	3	hypothetical protein		Unknown
ECs2653	0.904098	0.223008	0.705571	2.14357	3	hypothetical protein		Unknown
ECs3270	1.10445	0.164841	0.64956	2.01011	3	hypothetical protein		Unknown
ECs3531	1.23884	0.162186	0.472915	2.00511	3	hypothetical protein		Unknown
ECs4207	0.99355	0.420947	0.673725	1.86712	3	hypothetical protein		Unknown
ECs4839	1.0065	0.378775	0.748256	1.82888	3	hypothetical protein		Unknown
ECs0062	0.692832	0.305955	1.53867	1.59093	3	hypothetical protein		Unknown
ECs0356	1.01524	0.244413	1.12071	1.6288	3	hypothetical protein		Unknown
ECs1433	0.839614	0.283693	1.17549	1.75253	3	hypothetical protein		Unknown
ECs1443	0.877694	0.320381	1.25045	1.60535	3	hypothetical protein		Unknown
ECs1946	0.744854	0.185502	1.45309	1.72277	3	hypothetical protein		Unknown
ECs1954	0.854483	0.0844563	1.09263	2.00489	3	hypothetical protein		Unknown
ECs1956	0.782393	0.0523211	1.55942	1.71803	3	hypothetical protein		Unknown
ECs1959	0.710145	0.165448	1.67532	1.5914	3	hypothetical protein		Unknown
ECs1995	0.828545	0.137563	1.1389	1.94295	3	hypothetical protein		Unknown
ECs2085	0.749062	0.327372	1.17036	1.82198	3	hypothetical protein		Unknown
ECs4584	0.646278	0.241285	1.55465	1.69718	3	hypothetical protein		Unknown
ECs4585	0.614491	0.231148	1.44852	1.83746	3	hypothetical protein		Unknown
ECs4587	0.69211	0.291295	1.36908	1.7536	3	hypothetical protein		Unknown
ECs5230	0.854755	0.264406	1.45289	1.51279	3	hypothetical protein		Unknown
ECs5728	0.878784	0.274246	0.669925	2.15385	3	#N/A		Unknown
ECs5463	0.90993	0.242003	0.958347	1.89828	3	#N/A		Unknown
ECs5486	1.09493	0.288702	0.872337	1.70488	3	#N/A		Unknown
ECs5750	1.03724	0.335429	0.736984	1.84498	3	#N/A		Unknown
ECs2533	1.72723	0.877142	0.509205	0.677225	4	cold shock protein	cold shock protein	Stress response
ECs0662	1.97919	0.488556	0.366883	0.885646	4	cold shock protein	cold shock protein	Stress response
ECs4441	2.15082	0.090924	0.32487	1.1122	4	cold shock protein 7.4	cold shock protein	Stress response
ECs1145	1.87148	0.0976561	0.436164	1.34348	4	cold shock-like protein CspG	cold shock protein	Stress response
ECs3455	1.12233	0.354509	1.34821	1.19351	4	heat shock protein	heat shock protein	Stress response	HSP
ECs4912	1.10521	0.621562	1.00003	1.25052	4	heat shock protein htrC	heat shock protein	Stress response	HSP
ECs4626	1.20651	0.0865431	0.992073	1.66846	4	heat shock protein IbpB	heat shock protein	Stress response	HSP
ECs3258	1.35103	0.166573	1.15233	1.27661	4	putative heat shock protein	heat shock protein	Stress response	HSP
ECs3476	1.43482	0.268589	0.747149	1.42646	4	heat shock protein GrpE	heat shock protein	Stress response	HSP
ECs4627	1.53866	0.0821921	0.744176	1.49014	4	heat shock protein IbpA	heat shock protein	Stress response	HSP
ECs1134	1.03444	0.778232	2.04829	0.269482	4	probable third cytochrome oxidase subunit I	two-component system	Pathogenicity	two-component system	Two-component system
ECs1135	0.950678	0.896176	1.92029	0.363552	4	probable third cytochrome oxidase subunit II	two-component system	Stress response	two-component system	Two-component system
ECs5135	0.902427	0.837331	1.80947	0.576094	4	flavoprotein subunit of fumarate reductase FrdA	two-component system	Stress response	two-component system	Two-component system
ECs5133	1.0294	0.99528	1.69077	0.369887	4	fumarate reductase FrdC	two-component system	Stress response	two-component system	Two-component system
ECs5132	1.40343	0.82825	1.36353	0.372135	4	fumarate reductase FrdD	two-component system	Stress response	two-component system	Two-component system
ECs4603	1.3569	0.755916	0.912954	0.89096	4	hexose phosphate transport protein	two-component system	Pathogenicity	two-component system	Two-component system
ECs5134	0.925711	0.918393	1.90436	0.385184	4	iron-sulfur protein subunit of fumarate reductase FrdB	two-component system	Stress response	two-component system	Two-component system
ECs1732	1.26922	0.648782	1.10958	0.931903	4	nitrate reductase 1 gamma subunit	two-component system	Stress response	two-component system	Two-component system
ECs3082	1.17425	0.699021	0.866124	1.20699	4	nitrate/nitrite response regulator NarP	two-component system	Stress response	two-component system	Two-component system
ECs1130	0.928572	1.32198	1.62398	0.223548	4	probable Ni/Fe-hydrogenase 1 b-type cytochrome subunit	two-component system	Stress response	two-component system	Two-component system
ECs3565	1.20667	0.201037	0.818117	1.70534	4	putative 2-component transcriptional regulator	two-component system	Pathogenicity	two-component system
ECs3248	1.26691	0.746942	1.08311	0.859964	4	putative positive transcription regulator	two-component system	Stress response	two-component system	Two-component system
ECs3286	1.21437	0.584619	1.39945	0.809832	4	cysteine synthase A	antibiotics biosynthesis	Stress response	antibiotics biosynthesis	Biosynthesis of antibiotics
ECs4147	1.15948	0.82083	1.2494	0.770783	4	dehydroshikimate reductase	antibiotics biosynthesis	Stress response	antibiotics biosynthesis	Biosynthesis of antibiotics
ECs2488	0.878449	1.01449	1.72424	0.502515	4	glyceraldehyde-3-phosphate dehydrogenase A	antibiotics biosynthesis	Stress response	antibiotics biosynthesis	Biosynthesis of antibiotics
ECs2482	0.806338	1.19181	1.57839	0.539045	4	putative aldolase	antibiotics biosynthesis	Stress response	antibiotics biosynthesis
ECs0118	0.874817	0.471898	2.03659	0.77564	4	pyruvate dehydrogenase decarboxylase component	antibiotics biosynthesis	Stress response	antibiotics biosynthesis	Biosynthesis of antibiotics
ECs0746	1.20355	0.533569	1.26893	0.986888	4	succinate dehydrogenase	antibiotics biosynthesis	Stress response	antibiotics biosynthesis	Biosynthesis of antibiotics
ECs0747	1.33284	0.489222	1.14276	0.985672	4	succinate dehydrogenase hydrophobic subunit	antibiotics biosynthesis	Stress response	antibiotics biosynthesis	Biosynthesis of antibiotics
ECs2333	1.6931	0.486317	1.11065	0.584926	4	beta-lactam resistance protein	antibiotics resistance	Stress response	antibiotics resistance
ECs3036	1.16933	0.216545	0.878364	1.68233	4	vancomycin sensitivity	antibiotics resistance	Stress response	antibiotics resistance
ECs1937	1.83181	0.043856	1.08088	0.884892	4	phage superinfection exclusion protein	prophage	Stress response	prophage
ECs1080	1.0653	0.732054	0.77548	1.38329	4	prophage maintenance protein	prophage	Other category	prophage
ECs1520	0.839739	0.97648	0.798845	1.38996	4	prophage maintenance protein	prophage	Other category	prophage
ECs3013	1.28701	0.672268	0.81881	1.13962	4	putative integrase	prophage	Nucleotide metabolism and DNA recombination	prophage
ECs5121	1.64661	0.173917	0.575021	1.4164	4	suppressor of F exclusion of bacteriophage T7	prophage	Transcription and RNA processing	prophage
ECs2617	1.23341	0.497332	1.0438	1.18258	4	putative integrase	prophage	Nucleotide metabolism and DNA recombination	prophage
ECs1506	0.972715	0.742485	0.769123	1.48932	4	putative phage repressor	prophage	Transcription and RNA processing	prophage
ECs1439	1.23231	0.603604	0.805387	1.28511	4	damage-inducible protein DinI	SOS response	Stress response	SOS response
ECs0929	1.56504	0.658884	1.47977	0.246191	4	glutaredoxin1 redox coenzyme for glutathione-dependent ribonucleotide reductase	SOS response	Nucleotide metabolism and DNA recombination
ECs3483	1.29742	0.443452	1.1714	1.04878	4	putative DNA damage-inducible protein	SOS response	Nucleotide metabolism and DNA recombination	SOS response
ECs5045	1.39574	0.357464	1.50933	0.723239	4	redox-sensing activator of soxS	SOS response	Stress response
ECs4552	1.12249	0.799665	1.32761	0.768261	4	EscF protein	T3SS	Pathogenicity	T3SS	Bacterial secretion system
ECs2715	1.46967	0.451416	0.933551	1.041	4	EspF-like protein	T3SS	Pathogenicity	T3SS	Pathogenic Escherichia coli infection
ECs3549	1.10488	0.936765	0.998341	0.938739	4	autoinducer production protein LuxSE.c.	biofilm formation	Pathogenicity	biofilm formation	Biofilm formation - Escherichia coli
ECs2690	1.14389	0.443675	0.872513	1.49188	4	transcriptional regulator for ctr capsule biosynthesis	biofilm formation	Pathogenicity	biofilm formation	Biofilm formation - Escherichia coli
ECs3306	1.13209	0.447141	1.20007	1.21824	4	N-acetylmuramoyl-l-alanine amidase I	CAMP resistance	Stress response		Cationic antimicrobial peptide (CAMP resistance
ECs4431	1.29347	0.425252	1.65901	0.648364	4	putative fimbrial major protein precursor	fimbrial	Cell motility	cell motility
ECs4020	1.38297	0.645704	1.0062	0.888459	4	putative fimbrial-like protein	fimbrial	Cell motility	cell motility
ECs1812	0.990476	1.1622	1.37055	0.52837	4	hypothetical protein	pathogenicity	Pathogenicity		Pathogenic Escherichia coli infection
ECs4701	1.18252	0.847108	1.11832	0.830816	4	ilvGEDA operon leader peptide	pathogenicity	Pathogenicity
ECs1177	1.29632	0.480123	1.37595	0.836049	4	Kil protein	pathogenicity	Pathogenicity
ECs3461	1.40773	0.882793	1.11274	0.530399	4	leader peptide of chorismate mutase-P-prephenate dehydratase	pathogenicity	Pathogenicity
ECs2198	1.50256	1.18625	0.975905	0.233648	4	MokW	pathogenicity	Other category
ECs1245	1.86354	0.951313	0.77175	0.212264	4	MokW protein	pathogenicity	Other category
ECs1756	0.876044	1.35079	1.50463	0.361383	4	putative outer membrane protein	pathogenicity	Pathogenicity	outer membrane protein
ECs3460	1.33731	0.987772	0.695257	0.872675	4	putative yhbH sigma 54 modulator	pathogenicity	Pathogenicity	sigma-related
ECs5224	2.5046	0.165448	0.32839	0.611255	4	pyrBI operon leader peptide	pathogenicity	Pathogenicity
ECs2422	1.26278	0.68171	1.16164	0.861661	4	phenylalanyl-tRNA synthetase operon leader peptide	pathogenicity	Pathogenicity
ECs4714	1.20791	0.943503	0.956848	0.844652	4	thioredoxin 1	stress response	Other category	thiol stress response
ECs4432	2.14431	0.159628	1.35169	0.160334	4	putative resistance protein	stress response	Stress response
ECs4796	1.27306	0.559195	1.13412	0.995139	4	putative resistance protein	stress response	Stress response
ECs5313	0.937517	0.783045	1.87975	0.52708	4	putative carbon starvation protein	stress response	Stress response
ECs0933	1.15623	0.591456	0.925903	1.28372	4	putative sensory transduction regulator	stress response	Stress response
ECs1856	1.27932	0.789542	0.841048	1.01284	4	osmotically inducible lipoprotein	stress response	Stress response
ECs1001	1.18912	0.666171	1.173	0.955484	4	CTP:CMP-3-deoxy-D-manno-octulosonate transferase	lipopolysaccharide	Carbohydrate metabolism	lipopolysaccharide	Lipopolysaccharide biosynthesis
ECs0202	1.46066	0.619828	0.906337	0.90783	4	putative phosphatase	lipopolysaccharide	Carbohydrate metabolism	lipopolysaccharide	Lipopolysaccharide biosynthesis
ECs2910	1.2426	0.826911	1.10404	0.791349	4	putative outer membrane protein	outer membrane protein	Pathogenicity	outer membrane protein
ECs0396	0.992728	1.1181	1.40187	0.542368	4	galactoside permease	membrane	Transport
ECs4393	0.801741	0.775841	2.3102	0.323233	4	putative membrane protein	membrane	Other category
ECs2619	1.5662	0.419396	0.806674	1.06737	4	putative membrane protein	membrane	Other category
ECs2992	1.14756	0.935054	0.909531	0.966414	4	putative membrane protein	membrane	Other category
ECs4394	0.810362	0.884654	2.06825	0.414652	4	putative transport system permease protein	membrane	Transport
ECs4448	1.09523	0.839474	1.7524	0.392577	4	D-xylose isomerase	xylose	Carbohydrate metabolism		Fructose and mannose metabolism
ECs4450	1.01789	0.885955	1.62604	0.548631	4	putative ATP-binding protein of xylose transport system	xylose	Transport		ABC transporters
ECs4449	1.09583	0.988856	1.42466	0.527691	4	xylose binding protein transport system	xylose	Transport		ABC transporters
ECs5014	1.3102	0.650294	1.82532	0.260037	4	xylose-proton symport	xylose	Transport
ECs4447	0.872676	0.994281	1.77406	0.486291	4	xylulokinase	xylose	Carbohydrate metabolism		Pentose and glucuronate interconversions
ECs3060	0.752348	0.348758	2.77978	0.399754	4	fructose-1-phosphate kinase	fructose	Carbohydrate metabolism		Fructose and mannose metabolism
ECs3061	0.779767	0.269682	2.94534	0.301888	4	fructose-specific PTS system IIA component	fructose	Carbohydrate metabolism		Fructose and mannose metabolism
ECs3059	0.951436	0.450974	2.3049	0.471795	4	fructose-specific PTS transport system protein	fructose	Carbohydrate metabolism		Fructose and mannose metabolism
ECs0397	1.02992	1.01859	1.59782	0.426752	4	beta-D-galactosidase	carbohydrate metabolism	Carbohydrate metabolism		Galactose metabolism
ECs4694	1.20303	0.413168	1.36517	1.02377	4	ribokinase	carbohydrate metabolism	Carbohydrate metabolism		Pentose phosphate pathway
ECs5282	0.834417	0.63436	1.97553	0.715375	4	D-mannonate oxidoreductase	carbohydrate metabolism	Carbohydrate metabolism		Pentose and glucuronate interconversions
ECs5281	0.86479	0.615114	1.95266	0.717998	4	mannonate hydrolase	carbohydrate metabolism	Carbohydrate metabolism		Pentose and glucuronate interconversions
ECs2444	1.12055	0.91114	0.611098	1.28161	4	PEP-dependent phosphotransferase enzyme IV for cellobiose	carbohydrate metabolism	Carbohydrate metabolism		Starch and sucrose metabolism
ECs5171	1.28732	0.429584	1.15197	1.09153	4	putative PTS system enzyme IIA component	carbohydrate metabolism	Carbohydrate metabolism		Ascorbate and aldarate metabolism
ECs3181	0.818187	0.93041	1.80673	0.58675	4	phosphotransacetylase	carbon metabolism	Other category		Carbon metabolism
ECs4193	1.13231	0.361791	1.06182	1.42291	4	30S ribosomal subunit protein S12	30S ribosome	Transcription and RNA processing	ribosome	Ribosome
ECs4046	1.37049	0.469046	0.811452	1.24823	4	30S ribosomal subunit protein S15	30S ribosome	Transcription and RNA processing	ribosome	Ribosome
ECs0026	1.54848	0.277471	0.430467	1.55637	4	30S ribosomal subunit protein S20	30S ribosome	Transcription and RNA processing	ribosome	Ribosome
ECs3948	1.74262	0.267341	0.510339	1.26459	4	30S ribosomal subunit protein S21	30S ribosome	Transcription and RNA processing	ribosome	Ribosome
ECs4512	1.26182	0.298604	0.863367	1.50293	4	50S ribosomal subunit protein L28	50S ribosome	Transcription and RNA processing	ribosome	Ribosome
ECs4638	1.17278	0.390943	0.798697	1.57382	4	50S ribosomal subunit protein L34	50S ribosome	Transcription and RNA processing	ribosome	Ribosome
ECs2423	1.38344	0.607583	1.05146	0.886537	4	50S ribosomal subunit protein L20	50S ribosome	Transcription and RNA processing	ribosome	Ribosome
ECs4164	1.16707	0.506398	1.24549	1.07795	4	50S ribosomal subunit protein L36	50S ribosome	Transcription and RNA processing	ribosome	Ribosome
ECs0327	1.48806	0.279275	0.825501	1.28404	4	putative ribosomal protein	ribosome	Transcription and RNA processing	ribosome	Ribosome
ECs1330	1.15665	1.07676	0.966925	0.764704	4	ribosomal protein L31-like protein	ribosome	Transcription and RNA processing	ribosome	Ribosome
ECs5351	1.25838	0.827599	0.870371	0.974594	4	regulator for trp operon and aroH	operon	Transcription and RNA processing	transcriptional regulation
ECs3877	1.22833	0.512859	1.38846	0.874051	4	hydrogenase-2 operon protein HybE	operon	Transcription and RNA processing	transcriptional regulation
ECs3876	1.40589	0.390531	1.28335	0.874337	4	hydrogenase-2 operon protein HybF	operon	Transcription and RNA processing	transcriptional regulation
ECs3875	1.35105	0.429584	1.06027	1.0948	4	hydrogenase-2 operon protein HybG	operon	Transcription and RNA processing	transcriptional regulation
ECs2326	1.24364	0.601654	1.08481	1.03093	4	repressor for uid operon	operon	Transcription and RNA processing	transcriptional regulation
ECs0001	1.33655	0.793094	0.61384	1.13797	4	thr operon leader peptide	operon	Pathogenicity
ECs3043	1.17567	0.523836	0.986854	1.27481	4	mgl repressor	repressor	Transcription and RNA processing	transcriptional regulation
ECs0567	1.16223	1.05305	0.884661	0.853015	4	repressor of allantoin regulon	repressor	Transcription and RNA processing	transcriptional regulation
ECs4396	1.22697	1.04749	0.992935	0.687016	4	putative ARAC-type regulatory protein	TF	Transcription and RNA processing	transcriptional regulation
ECs2603	1.33232	0.825768	1.08358	0.702781	4	putative regulator	TF	Transcription and RNA processing	transcriptional regulation
ECs3122	1.37198	0.328178	0.849487	1.3536	4	putative transcriptional regulator	TF	Transcription and RNA processing	transcriptional regulation
ECs3742	1.0236	0.914094	0.617799	1.38897	4	putative transcriptional regulator	TF	Transcription and RNA processing	transcriptional regulation
ECs4918	1.07476	0.884423	0.700389	1.28553	4	putative transcriptional regulator	TF	Transcription and RNA processing	transcriptional regulation
ECs4695	1.34335	0.427005	0.92281	1.2259	4	regulator for rbs operon	TF	Transcription and RNA processing	transcriptional regulation
ECs2988	1.17428	0.758703	1.30736	0.764557	4	regulatory protein CII	TF	Transcription and RNA processing	transcriptional regulation
ECs2783	1.18733	0.64527	1.29122	0.875805	4	transcriptional regulator cys regulon	TF	Transcription and RNA processing	transcriptional regulation
ECs4157	1.20963	0.415454	1.01315	1.31915	4	Zinc (II) responcive transcriptional activator	TF	Transcription and RNA processing	transcriptional regulation
ECs2620	1.10053	0.653246	0.743859	1.44695	4	putative transcriptional regulator	TF	Transcription and RNA processing	transcriptional regulation
ECs4691	1.13132	0.268035	0.916817	1.64325	4	ATP-binding component of D-ribose high-affinity transport system	transport	Transport		ABC transporters
ECs3540	0.961709	0.909241	1.98623	0.280107	4	ATP-binding component of glycine betaine / proline transport system	transport	Transport		ABC transporters
ECs3041	1.21644	0.636215	1.15628	0.967086	4	ATP-binding component of methyl-galactoside transport system	transport	Transport		ABC transporters
ECs3087	1.2025	0.683525	1.22141	0.880175	4	heme exporter protein C	transport	Transport		ABC transporters
ECs3541	0.814353	0.506797	2.40792	0.491013	4	high-affinity glycine betaine / proline transport system protein	transport	Transport		ABC transporters
ECs3040	1.42345	0.54684	1.13532	0.826269	4	methyl-galactoside transport system permease protein	transport	Transport		ABC transporters
ECs0420	0.798925	0.539891	2.44764	0.442081	4	taurine ATP-binding component of a transport system	transport	Transport		ABC transporters
ECs0419	0.925527	0.548288	2.32909	0.384993	4	taurine transport system periplasmic protein	transport	Transport		ABC transporters
ECs0421	1.0441	0.587078	2.14964	0.360141	4	taurine transport system permease protein	transport	Transport		ABC transporters
ECs2569	1.32861	0.281737	1.5325	0.858885	4	hypothetical protein	transport	Other category		ABC transporters
ECs2568	1.27167	0.333035	1.49579	0.90791	4	putative ATP-binding component of a transport system	transport	Transport		ABC transporters
ECs3702	1.28683	0.426808	0.87133	1.33849	4	putative transporter protein	transport	Transport
ECs0916	1.32036	1.21238	0.822947	0.558652	4	putative receptor	transport	Transport
ECs0360	1.05444	1.07742	1.31642	0.583104	4	high-affinity choline transport	transport	Transport
ECs3698	1.63363	0.552879	1.16956	0.538794	4	low-affinity L-arabinose transport system proton symport protein	transport	Transport
ECs5097	0.925101	0.457463	2.61858	0.224602	4	putative amino acid/amine transport protein	transport	Transport
ECs2302	0.779214	0.556041	2.29803	0.579491	4	putative transport protein	transport	Transport
ECs4368	1.18032	0.893988	1.17844	0.734615	4	putative transport protein	transport	Transport
ECs4042	1.33208	0.240518	0.786378	1.54339	4	tryptophan-specific transport protein	transport	Amino acid and protein metabolism
ECs1129	0.90576	1.13362	1.89576	0.202377	4	hydrogenase-1 large subunit		Other category		Nitrotoluene degradation
ECs1128	0.780477	1.20599	1.98205	0.205527	4	hydrogenase-1 small subunit		Other category		Nitrotoluene degradation
ECs1131	1.00593	1.24703	1.57047	0.251911	4	processing of HyaA and HyaB proteins		Other category
ECs1132	1.08604	1.07908	1.54116	0.348522	4	hydrogenase 1 formation factor HyaE		Other category
ECs1133	1.04254	0.965848	1.76019	0.323173	4	hydrogenase-1 cofactor biosynthesis protein hyaF		Other category
ECs0969	1.75391	0.181065	0.682815	1.18721	4	protein chain initiation factor IF-1		Amino acid and protein metabolism
ECs3567	1.17432	0.182393	2.11697	0.63521	4	putative oxidoreductase		Other category
ECs5099	0.93709	0.409795	2.68539	0.199677	4	biodegradative arginine decarboxylase		Amino acid and protein metabolism		Arginine and proline metabolism
ECs5168	1.28967	0.341421	1.40042	0.960792	4	hypothetical protein		Other category		Ascorbate and aldarate metabolism
ECs1772	0.6996	0.459339	2.45051	0.638713	4	putative colonization factor		Other category
ECs5061	0.885096	0.914925	1.73192	0.58696	4	selenopolypeptide subunit of formate dehydrogenase H		Other category
ECs5128	1.3178	0.547637	0.868302	1.18379	4	elongation factor P		Nucleotide metabolism and DNA recombination
ECs2014	1.36532	0.63247	1.32932	0.642292	4	acyl carrier protein phosphodiesterase		Other category
ECs3931	1.29366	1.20775	0.681245	0.718234	4	glycogen biosynthesis protein GlgS		Other category
ECs0986	0.831232	1.13969	1.56575	0.572061	4	formate acetyltransferase 1		Other category		Pyruvate metabolism
ECs5054	1.16312	0.953237	1.22932	0.6521	4	formate-dependent nitrite reductase NrfC		Other category
ECs1136	0.903639	0.830325	1.85607	0.541166	4	phosphoanhydride phosphorylase		Other category		Riboflavin metabolism
ECs3932	1.33332	0.466702	1.28994	0.879756	4	putative oxidoreductase		Other category
ECs3984	0.656661	1.32956	1.63615	0.531111	4	putative transferase		Other category
ECs3418	1.02681	0.276124	1.72396	1.05977	4	dihydropteridine reductase		Other category
ECs3530	1.1201	0.65152	1.3485	0.900401	4	DNA-binding protein		Nucleotide metabolism and DNA recombination
ECs4686	1.28609	0.286307	1.03662	1.3357	4	asparagine synthetase A		Amino acid and protein metabolism		Biosynthesis of amino acids
ECs0135	1.10145	0.49351	0.779708	1.57369	4	aspartate 1-decarboxylase		Amino acid and protein metabolism		beta-Alanine metabolism
ECs5120	1.22357	0.994134	1.06816	0.6789	4	aspartate ammonia-lyase		Amino acid and protein metabolism		Alanine, aspartate and glutamate metabolism
ECs0052	1.16275	0.726268	0.879411	1.18211	4	CcdA-like protein		Other category
ECs1668	1.22805	0.92305	0.959354	0.838702	4	cell division topological specificity factor MinE		Cell division
ECs4682	1.13012	0.51221	1.10189	1.24108	4	glucose-inhibited division protein GidB		Cell division
ECs4898	1.41789	0.55739	1.20857	0.758849	4	glutamate racemase		Amino acid and protein metabolism		D-Glutamine and D-glutamate metabolism
ECs5111	0.943389	0.942552	1.80463	0.426534	4	lysine tRNA synthetase		Nucleotide metabolism and DNA recombination		Aminoacyl-tRNA biosynthesis
ECs3818	0.939904	0.421381	2.16377	0.637553	4	methionine adenosyltransferase 1		Amino acid and protein metabolism		Biosynthesis of amino acids
ECs2384	1.90674	0.993947	0.572669	0.290911	4	murein lipoprotein		Other category
ECs0958	0.850283	0.595963	2.05694	0.66391	4	NADH oxidoreductase for the HCP		Other category
ECs4217	1.33598	0.667532	1.32173	0.649125	4	nitrite reductase (NAD(P)H) subunit		Other category		Nitrogen metabolism
ECs2435	1.28098	0.296931	1.05465	1.3156	4	part of a kinase		Other category
ECs2650	1.27531	0.395442	0.771643	1.47003	4	phosphatidylglycerophosphate synthetase		Other category		Glycerophospholipid metabolism
ECs0263	0.879346	0.564525	1.95489	0.748967	4	probable peptide chain release factor		Amino acid and protein metabolism
ECs1680	1.19726	0.493856	1.06534	1.21065	4	protein-disulfide oxidoreductase		Other category
ECs2330	1.24303	0.371335	0.959854	1.3693	4	putative aminotrasferase		Amino acid and protein metabolism		Biosynthesis of amino acids
ECs1040	1.23341	0.887624	0.765622	1.0357	4	putative dehydrogenase		Other category
ECs3566	1.30729	0.15895	2.08631	0.525888	4	putative flavodoxin		Other category
ECs3445	2.49259	0.214017	0.772817	0.191532	4	putative formate acetyltransferase		Other category
ECs1370	1.48477	0.706437	0.92983	0.772385	4	putative glucosyl-transferase		Other category
ECs2297	1.1181	0.553546	1.00781	1.296	4	putative oxidoreductase component		Other category
ECs0959	0.742702	0.633645	2.38767	0.468195	4	putative prismane HCP protein		Other category		Nitrogen metabolism
ECs4631	1.15461	0.353775	0.999378	1.45837	4	putative replicase		Nucleotide metabolism and DNA recombination
ECs2995	1.13647	0.641448	0.930397	1.25374	4	putative superinfection exclusion protein		Other category
ECs1935	1.27863	0.0529069	1.0393	1.57455	4	racC protein		Nucleotide metabolism and DNA recombination
ECs0422	0.997818	0.68338	2.16363	0.307615	4	taurine dioxygenase		Other category		Sulfur metabolism
ECs0395	1.17625	1.01458	1.29324	0.519844	4	thiogalactoside acetyltransferase		Other category
ECs3506	1.24908	0.611832	1.0222	1.06863	4	hypothetical lipoprotein		Other category
ECs1779	1.51707	0.547097	0.669532	1.11819	4	hypothetical lipoprotein		Other category
ECs1563	1.18315	0.478715	1.50911	0.857414	4	hypothetical membrane protein		Other category
ECs5169	1.53697	0.290208	1.03441	1.03325	4	hypothetical protein		Other category		Ascorbate and aldarate metabolism
ECs5170	1.43649	0.384813	1.03316	1.06055	4	hypothetical protein		Other category		Ascorbate and aldarate metabolism
ECs0334	1.30372	0.606137	0.95183	1.06994	4	hypothetical protein		Unknown
ECs0669	1.29287	0.355976	1.03964	1.25563	4	hypothetical protein		Unknown
ECs0817	1.31202	0.451229	0.815174	1.33276	4	hypothetical protein		Unknown
ECs1030	1.19895	0.548416	0.843739	1.34669	4	hypothetical protein		Unknown
ECs1067	1.22158	0.664664	0.75901	1.27746	4	hypothetical protein		Unknown
ECs1077	1.25614	0.201954	0.966617	1.51628	4	hypothetical protein		Unknown
ECs1086	1.42674	0.442812	0.919186	1.11345	4	hypothetical protein		Unknown
ECs1244	1.25569	0.6046	1.03961	1.0528	4	hypothetical protein		Unknown
ECs1441	1.2496	0.494744	0.856088	1.32872	4	hypothetical protein		Unknown
ECs1735	1.19016	0.69713	0.76282	1.27948	4	hypothetical protein		Unknown
ECs1852	1.2478	0.633089	0.793769	1.2473	4	hypothetical protein		Unknown
ECs2042	1.30237	0.303424	0.817389	1.48947	4	hypothetical protein		Unknown
ECs2049	1.02879	0.593993	0.74171	1.59372	4	hypothetical protein		Unknown
ECs2149	1.29967	0.484232	0.915367	1.22774	4	hypothetical protein		Unknown
ECs2348	1.11149	0.467084	0.95743	1.43369	4	hypothetical protein		Unknown
ECs2363	1.20903	0.474725	1.01501	1.25928	4	hypothetical protein		Unknown
ECs2507	1.14371	0.521754	0.983024	1.31848	4	hypothetical protein		Unknown
[truncated: 242 more rows]
